# Supplementary material for: Vaginal Lactobacillus iners abundance is associated with outcome in antibiotic treatment of bacterial vaginosis and capable of inhibiting Gardnerella
Source: PubMed Central journal article supplement (PMC9723143; doi:10.3389/fcimb.2022.1033431), 2022-11-22
Supplement: DataSheet_1.pdf [file DataSheet_1.pdf]

A

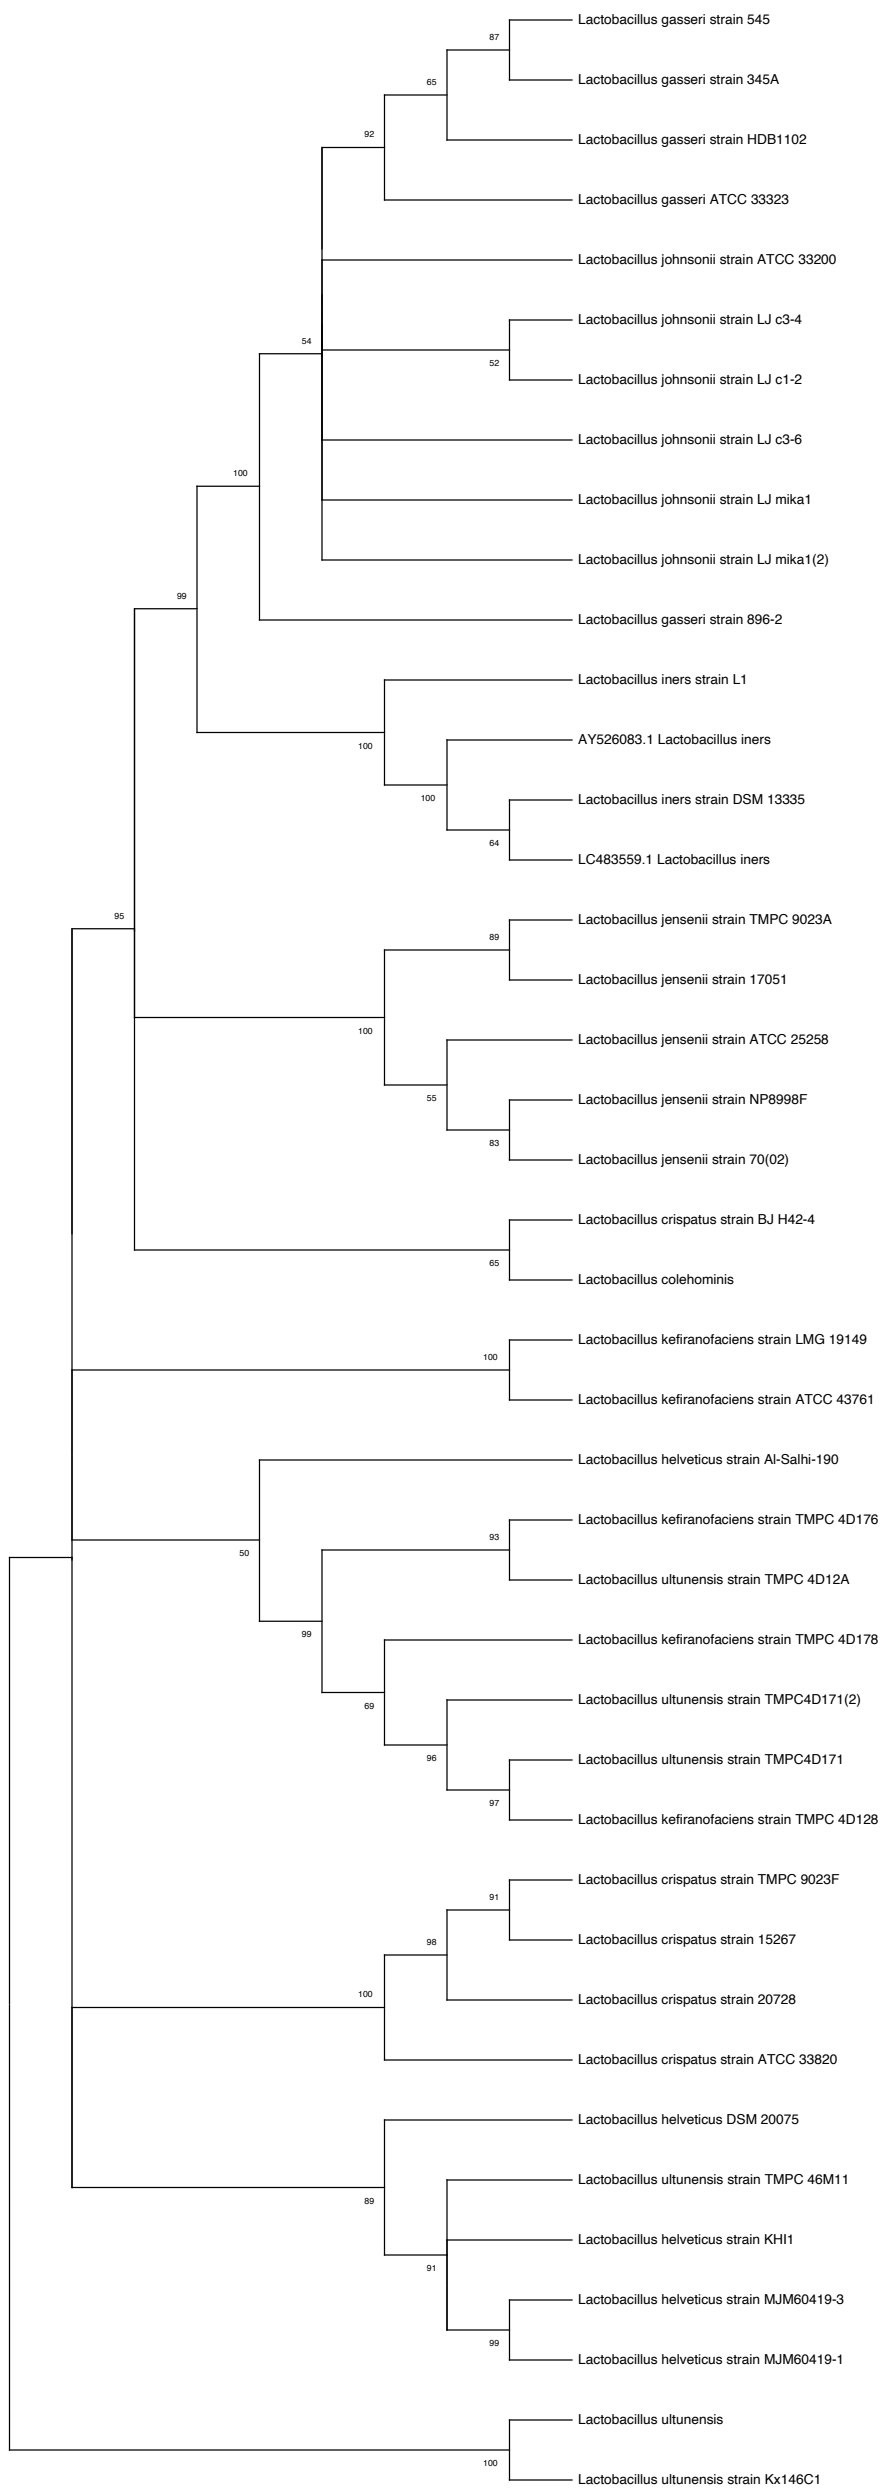

B

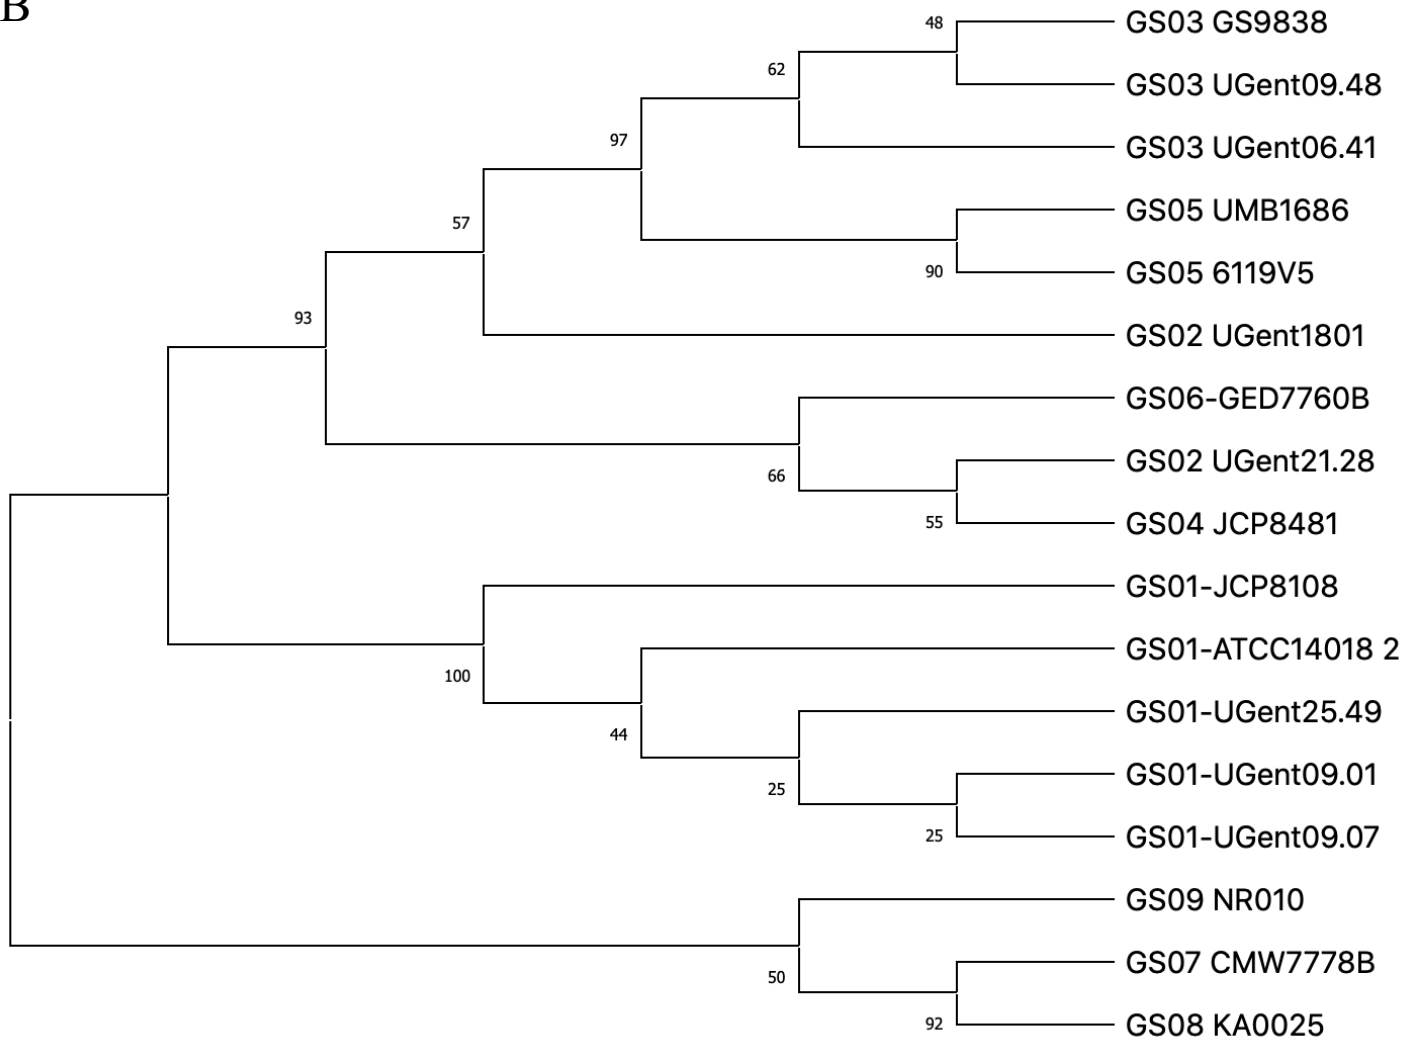

**[Supplementary Figure 2] Intergroup comparison of Nugent score and vaginal pH**

This figure shows the intergroup comparison of Nugent score (Supplementary Figure-2A) and vaginal pH (Supplementary Figure-2B) among Group cured, Group intermediate and Group failed with Kruskal-Wallis test used for statistical analysis. Only statistically significant differences are marked in the figure.

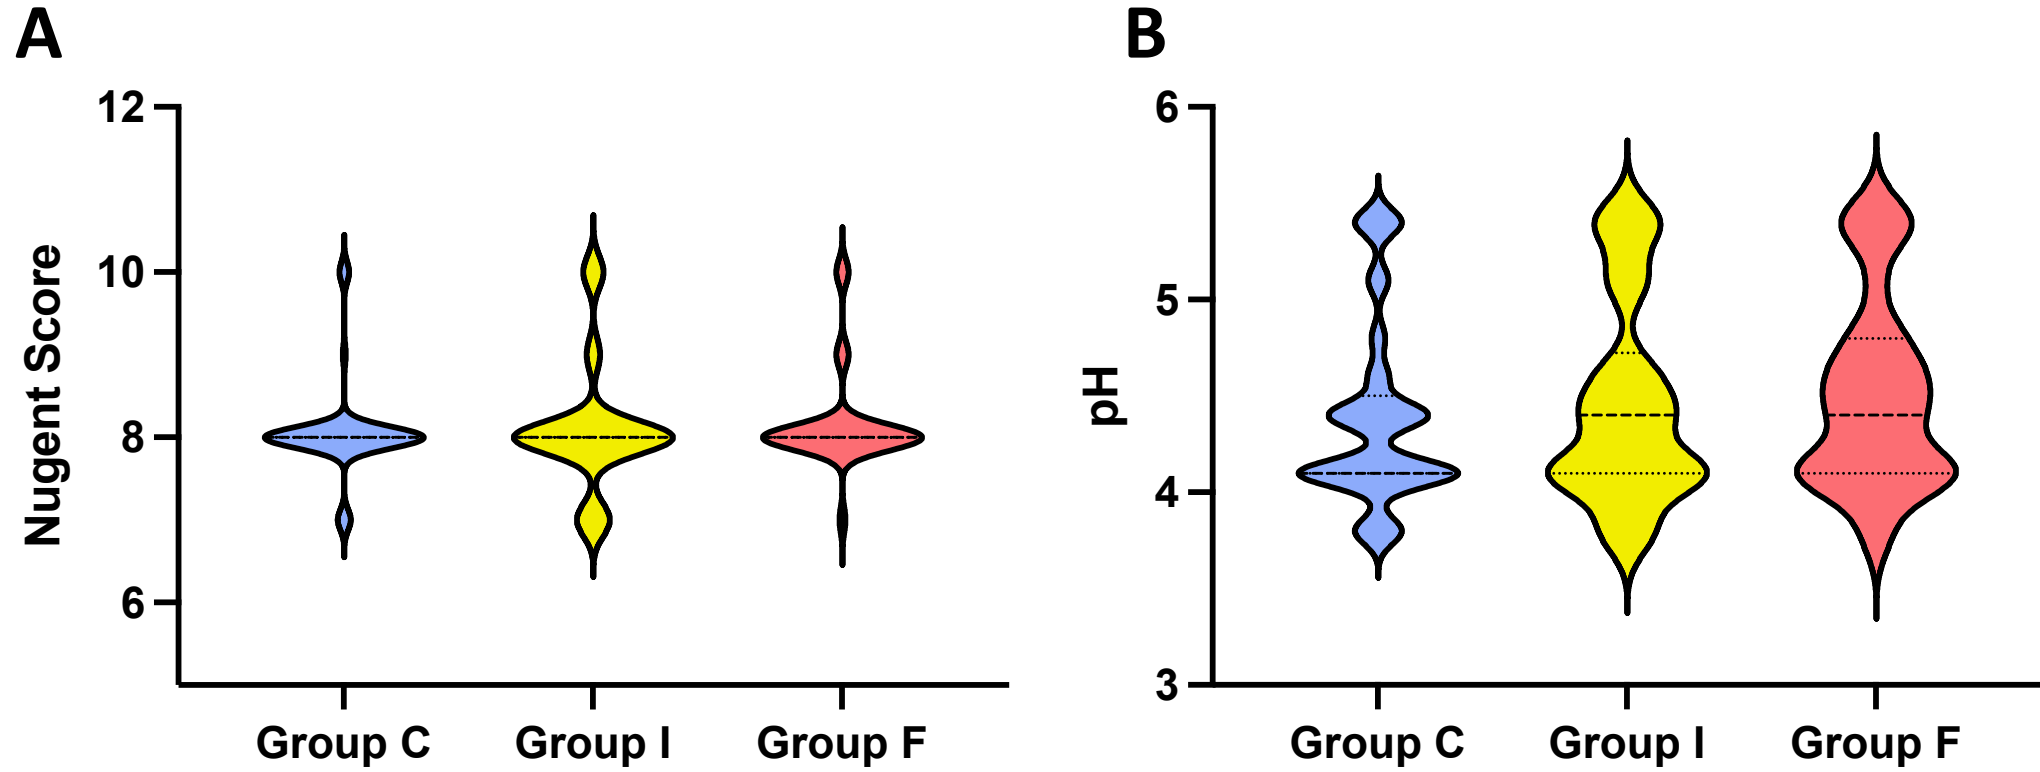

**[Supplementary Figure 3]  $\alpha$ -diversity analysis of all participants**

This figure shows the  $\alpha$ -diversity analysis of healthy women and BV patients in each group. Significance is exhibited as: \*:  $p < 0.05$ ; \*\*:  $p < 0.01$ ; \*\*\*:  $p < 0.001$ ; \*\*\*\*:  $p < 0.0001$ ; Wilcoxon test for pairwise comparison between pre- and posttreatment and Kruskal-Wallis test for comparisons among different groups.

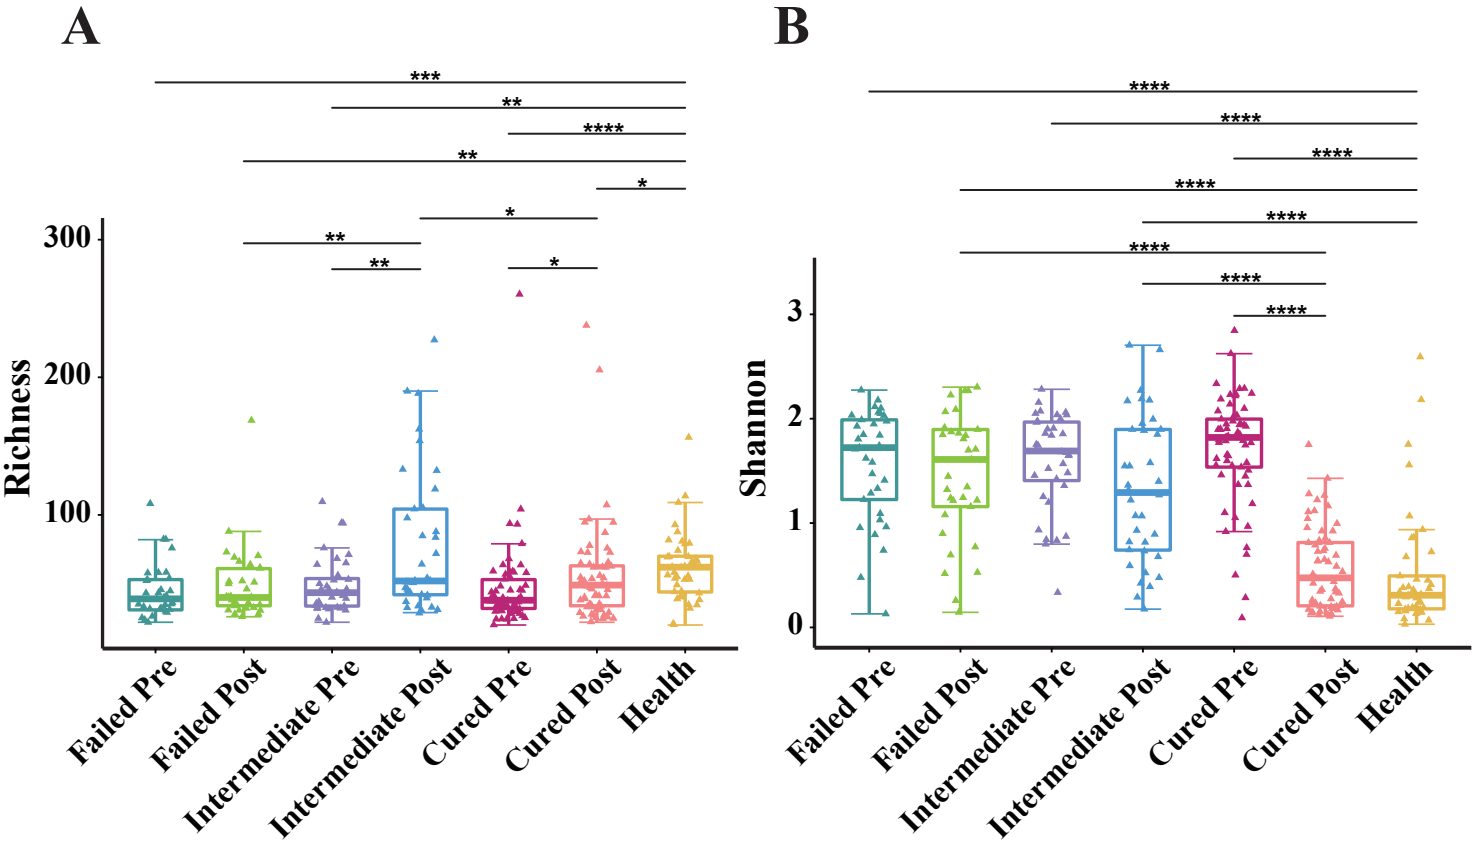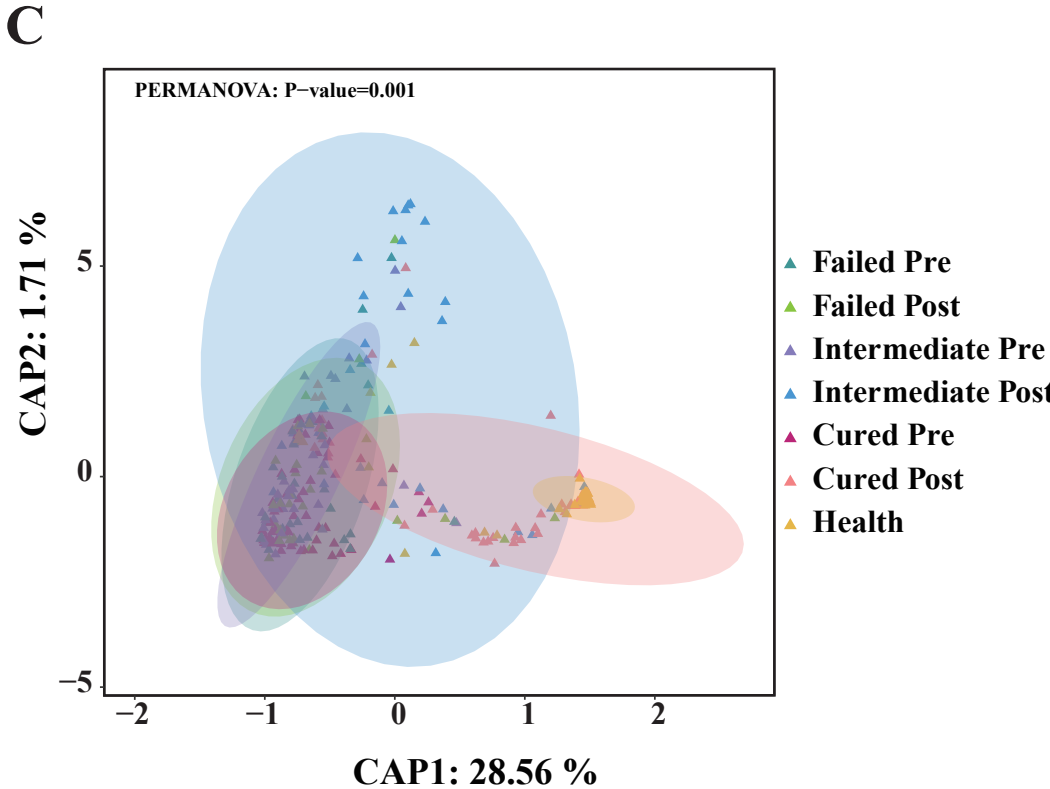

[Supplementary Figure 4] Antimicrobial activity test of *L. johnsonii* or *L. iners* against *G. vaginalis* or *F. vaginae*

A. Shows broths we used for antimicrobial activity tests. The clarity, brightness and contrast ratio were adjusted to better show the inhibition zone. The black dashed line marked the estimated edge of inhibition zone in each broth.

B. Shows the radius of inhibition zone in each broth.

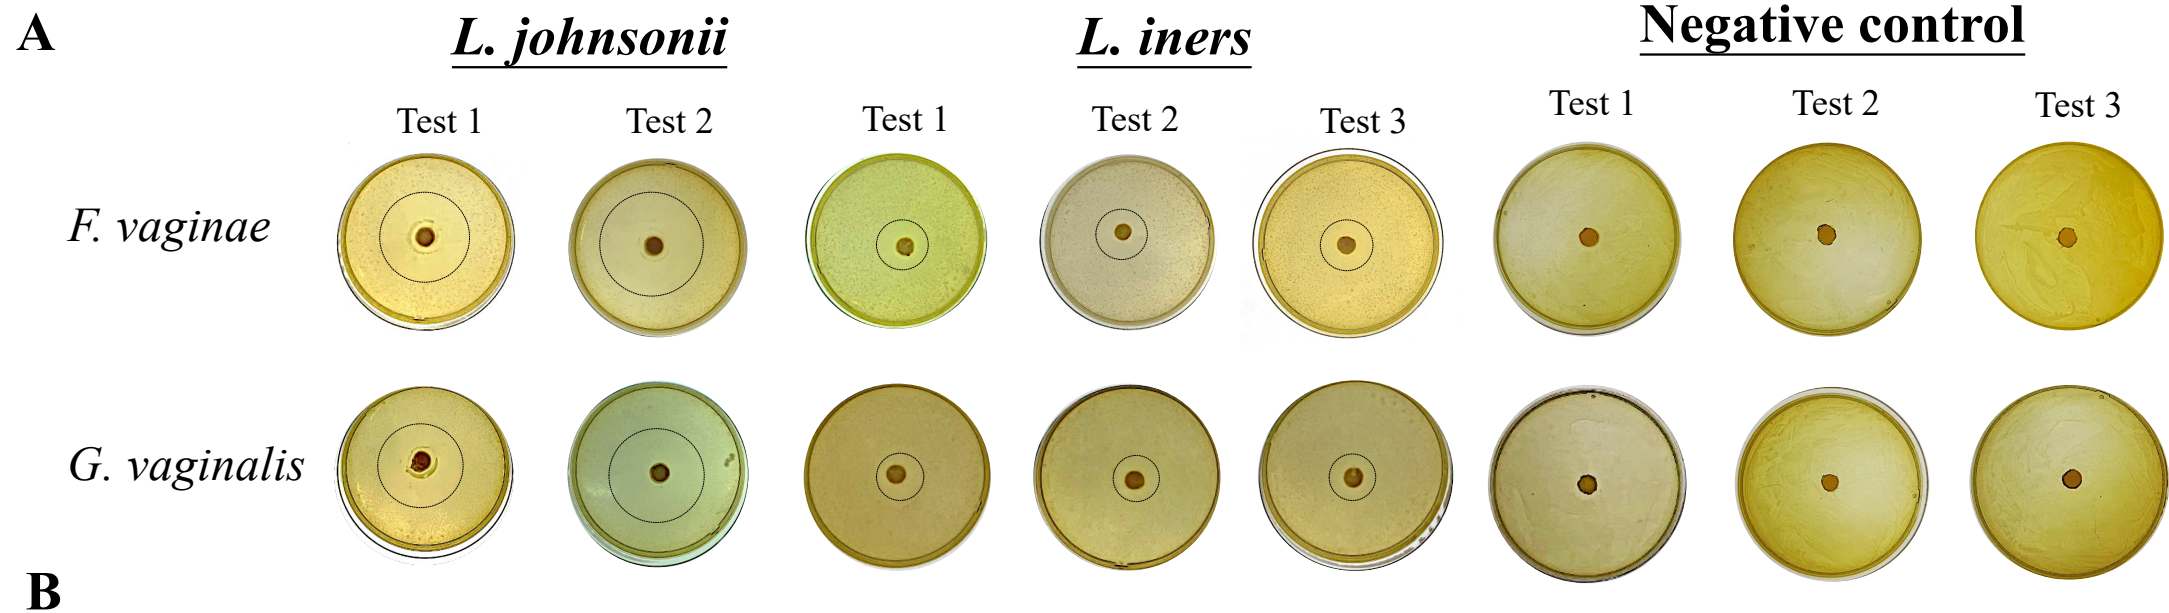

|                     | <i>L. johnsonii</i> <sup>a</sup> |        | <i>L. iners</i> <sup>a</sup> |        |        | Negative Control <sup>a</sup> |        |        |
|---------------------|----------------------------------|--------|------------------------------|--------|--------|-------------------------------|--------|--------|
|                     | Test 1                           | Test 2 | Test 1                       | Test 2 | Test 3 | Test 1                        | Test 2 | Test 3 |
| <i>F. vaginae</i>   | 4.6cm                            | 5.5cm  | 2.5cm                        | 2.7cm  | 3.5cm  | 0cm                           | 0cm    | 0cm    |
| <i>G. vaginalis</i> | 4.2cm                            | 4.5cm  | 1.9cm                        | 2.0cm  | 2.0cm  | 0cm                           | 0cm    | 0cm    |

<sup>a</sup> This table shows the radius of inhibition zone in each broth.

[Supplementary Table 1] 16S rDNA sequence of *Gardnerella* genomospecies and *Lactobacillus* spp involved in this study

| Species                        | Strain     | Sequence                                                                                                                                                                                                                                                                                                                                                                                                                                                                                                                                                                                                                                                                                                                                                                                                                                                                                                                                                                                                                                                                                                                                                                                                                                                                                                                                                                                                                                                                                                                                                                                                                                                                     |
|--------------------------------|------------|------------------------------------------------------------------------------------------------------------------------------------------------------------------------------------------------------------------------------------------------------------------------------------------------------------------------------------------------------------------------------------------------------------------------------------------------------------------------------------------------------------------------------------------------------------------------------------------------------------------------------------------------------------------------------------------------------------------------------------------------------------------------------------------------------------------------------------------------------------------------------------------------------------------------------------------------------------------------------------------------------------------------------------------------------------------------------------------------------------------------------------------------------------------------------------------------------------------------------------------------------------------------------------------------------------------------------------------------------------------------------------------------------------------------------------------------------------------------------------------------------------------------------------------------------------------------------------------------------------------------------------------------------------------------------|
| <i>Lactobacillus Crispatus</i> | TMPC 9023F | <p>TAAGCATAGACGGCTATACATGCAAGTCGAGCGAGCGGAACCTAACAGATTTACTTCGGTAATGACGTTAGGAAAGCG<br/> AGCGGCGGATGGGTGAGTAACACGTGGGGAACCTGCCCATAGTCTGGGATACCACTTGGAAAAGGTGCTAATACCG<br/> GATAAGAAAGCAGATCGCATGATCAGCTTTTAAAAGGCGGCGTAAGCTGTCGCTATGGGATGGCCCCGCGGTGCATT<br/> AGCTAGTTGGTAAGGTAAAGGCTTACCAAGGCGATGATGCATAGCCGAGTTGAGAGACTGATCGGCCACATTGGGAC<br/> TGAGACACGGCCAAACTCCTACGGGAGGCAGCAGTAGGGAATCTTCCACAATGGACGCAAGTCTGATGGAGCAACG<br/> CCGCGTGAGTGAAGAAGGTTTTTCGGATCGTAAAGCTCTGTTGTTGGTGAAGAAGGATAGAGGTAGTAAGTGGCCTTTA<br/> TTTGACGGTAATCAACCAGAAAAGTCACGGGTAACACTACGTGCCAGCAGCCGCGTAATACGTAGGTGGCAAGCGTTGTC<br/> CGGATTTATTGGGCGTAAAGCGAGCGCAGGCGGAAGAATAAGTCTGATGTGAAAGCCCTCGGCTTAACCGAGGAACT<br/> GCATCGGAAACTGTTTTTCTTGTAGTGCAGAAGAGGAGAGTGGAACTCCATGTGTAGCGGTGGAATGCGTAGATATATG<br/> GAAGAACACCAGTGGCGAAGGCGGCTCTCTGGTCTGCAACTGACGCTGAGGCTCGAAAGCATGGGTAGCGAACAGGA<br/> TTAGATAACCCTGGTAGTCCATGCCGTAACGATGAGTGCTAAGTGTGGGAGGTTTCCGCCTCTCAGTGCTGCAGCTA<br/> ACGCATTAAGCACTCCGCCTGGGAGTACGACCGCAAGGTTGAACTCAAAGGAATTGACGGGGGCCGCACAAGCG<br/> GTGGAGCATGTGGTTTAATTTCGAAGCAACGCGAAGAACCTTACCAGGTCTTGACATCTAGTGCCATTTGTAGAGATAC<br/> AAAGTTCCTTCGGGGACGCTAAGACAGGTGGTGCATGGCTGTCGTGAGTCTCGTGTGAGATGTTGGGTTAAGTCC<br/> CGAACGAGCGCAACCCTTGTATTAGTTGCCAGCATTAAAGTTGGGCACTCTAATGAGACTGCCGGTGACAAACCGGA<br/> GGAAGGTGGGATGACGTCAAGTCATCATGCCCTTATGACCTGGGCTACACACGTGCTACAATGGGCAGTACAACG<br/> AGAAGCGAGCCTGCGAAGGCAAGCGAATCTCTGAAAGCTGTTCTCAGTTCGGACTGCAGTCTGCAACTCGACTGCACG<br/> AAGCTGGAATCGCTAGTAATCGCGGATCAGCACGCCGCGGTGAATACGTTCCCGGGCCTTGTACACACCGCCCGTAC<br/> ACCATGGGAGTCTGCAATGCCCAAAGCCGGTGGCCTAACCTTCGGGAAGGAGCCGTCTAAGGCAGGGCAGATGACTG<br/> GGGTGAAGTCGTAACAAGAGCATTAC</p> |
|                                | 15267      | <p>TCGAGCGAGCGGAACCTAACAGATTTACTTCGGTAATGACGTTAGGAAAGCGAGCGGCGGATGGGTGAGTAACACGTG<br/> GGGAACCTGCCCATAGTCTGGGATACCACTTGGAAACAGGTGCTAATACCGGATAAGAAAGCAGATCGCATGATCA<br/> GCTTTTAAAAGGCGGCGTAAGCTGTCGCTATGGGATGGCCCCGCGGTGCATTAGCTAGTTGGTAAGGTAAAGGCTTAC<br/> CAAGGCGATGATGCATAGCCGAGTTGAGAGACTGATCGGCCACATTGGGACTGAGACACGGCCAAACTCCTACGGG<br/> AGGCAGCAGTAGGGAATCTTCCACAATGGACGCAAGTCTGATGGAGCAACGCCGCGTGAGTGAAGAAGGTTTTTCGGA<br/> TCGTAAAGCTCTGTTGTTGGTGAAGAAGGATAGAGGTAGTAAGTGGCCTTTATTTGACGGTAATCAACCAGAAAAGTCA<br/> CGGCTAACTACGTGCCAGCAGCCGCGTAATACGTAGGTGGCAAGCGTTGTCCGGATTTATTGGGCGTAAAGCGAGC<br/> GCAGGCGGAAGAATAAGTCTGATGTGAAAGCCCTCGGCTTAACCGAGGAACTGCATCGGAAACTGTTTTTCTTGTAGTG<br/> CAGAAGAGGAGAGTGGAACTCCATGTGTAGCGGTGGAATGCGTAGATATATGGAAGAACCAGTGGCGAAGGCGG<br/> CTCTCTGGTCTGCAACTGACGCTGAGGCTCGAAAGCATGGGTAGCGAACAGGATTAGATAACCCTGGTAGTCCATGCCG<br/> TAAACGATGAGTGCTAAGTGTGGGAGGTTTTCCGCCTCTCAGTGTGACGCTAACGCATTAAGCACTCCGCCTGGGGA<br/> GTACGACCGCAAGGTTGAACTCAAAGGAATTGACGGGGGCCGCACAAGCGGTGGAGCATGTGGTTTAATTCTGAAG</p>                                                                                                                                                                                                                                                                                                                                                                                                                                                                                                                                                                                                                                      |

|  |            |                                                                                                                                                                                                                                                                                                                                                                                                                                                                                                                                                                                                                                                                                                                                                                                                                                                                                                                                                                                                                                                                                                                                                                                                                                                                                                                                                                                                                                                                                                                                                                                                       |
|--|------------|-------------------------------------------------------------------------------------------------------------------------------------------------------------------------------------------------------------------------------------------------------------------------------------------------------------------------------------------------------------------------------------------------------------------------------------------------------------------------------------------------------------------------------------------------------------------------------------------------------------------------------------------------------------------------------------------------------------------------------------------------------------------------------------------------------------------------------------------------------------------------------------------------------------------------------------------------------------------------------------------------------------------------------------------------------------------------------------------------------------------------------------------------------------------------------------------------------------------------------------------------------------------------------------------------------------------------------------------------------------------------------------------------------------------------------------------------------------------------------------------------------------------------------------------------------------------------------------------------------|
|  |            | <p>CAACGCGAAGAACCTTACCAGGTCTTGACATCTAGTGCCATTTGTAGAGATACAAAGTTCCCTTCGGGGACGCTAAGA<br/> CAGGTGGTGCATGGCTGTCGTCAGCTCGTGTGCTGAGATGTTGGGTTAAGTCCCAGCAACGAGCGCAACCCTTGTTATT<br/> AGTTGCCAGCATTAAAGTTGGGCACTCTAATGAGACTGCCGGTGACAAACCGGAGGAAGGTGGGGATGACGTCAAGTC<br/> ATCATGCCCCCTTATGACCTGGGCTACACACGTGCTACAATGGGCAGTACAACGAGAAGCGAGCCTGCGAAGGCAAGC<br/> GAATCTCTGAAAGCTGTTCTCAGTTCGGACTGCAGTCTGCAACTCGACTGCACGAAGCTGGAATCGCTAGTAATCGCG<br/> GATCAGCACGCCGCGGTGAATACGTTCCCAGGGCCTTGTACACACCGCCCGTCACACCATGGGAGTCTGCAATGCCCAA<br/> AGCCGGTGGCCTAACCTTCGGGAAGGAGCC</p>                                                                                                                                                                                                                                                                                                                                                                                                                                                                                                                                                                                                                                                                                                                                                                                                                                                                                                                                                                                                                                       |
|  | 20278      | <p>AAGTCGAGCGAGCGGAACCTAACAGATTTACTTCGGTAATGACGTTAGGAAAGCGAGCGGCGGATGGGTGAGTAACAC<br/> GTGGGGAACCTGCCCATAGTCTGGGATACCACTTGGAAACAGGTGCTAATACCGGATAAGAAAGCAGATCGCATGA<br/> TCAGCTTTTAAAAGGCGGGCGTAAGCTGTCGCTATGGGATGGCCCCGCGGTGCATTAGCTAGTTGGTAAGGTAAGGCT<br/> TACCAAGGCGATGATGCATAGCCGAGTTGAGAGACTGATCGGCCACATTGGGACTGAGACACGGCCCAAACCTCCTAC<br/> GGGAGGCAGCAGTAGGGAATCTCCACAATGGACGCAAGTCTGATGGAGCAACGCCGCGTGAGTGAAGAAGGTTTTTC<br/> GGATCGTAAAGCTCTGTTGTTGGTGAAGAAGGATAGAGGTAGTAACTGGCCTTTATTTGACGGTAATCAACCAGAAAG<br/> TCACGGCTAACTACGTGCCAGCAGCCGCGGTAATACGTAGGTGGCAAGCGTTGTCCGATTTATTGGGCGTAAAGCGA<br/> GCGCAGGCGGAAGAATAAGTCTGATGTGAAAGCCCTCGGCTTAACCGAGGAACTGCATCGGAAACTGTTTTTCTTGAG<br/> TGCAGAAGAGGAGAGTGGAACTCCATGTGTAGCGGTGGAATGCGTAGATATATGGAAGAACACCAGTGGCGAAGGC<br/> GGCTCTCTGGTCTGCAACTGACGCTGAGGCTCGAAAGCATGGGTAGCGAACAGGATTAGATACCCTGGTAGTCCATGC<br/> CGTAAACGATGAGTGCTAAGTGTGGGAGGTTTTCCGCCTCTCAGTGTCTGCAGCTAACGCATTAAGCACTCCGCCTGGG<br/> GAGTACGACCGCAAGGTTGAAACTCAAAGGAATTGACGGGGGCCCGCACAAAGCGGTGGAGCATGTGGTTTAATTCGA<br/> AGCAACGCGAAGAACCTTACCAGGTCTTGACATCTAGTGCCATTTGTAGAGATACAAAGTTCCCTTCGGGGACGCTAA<br/> GACAGGTGGTGCATGGCTGTCGTCAGCTCGTGTGCTGAGATGTTGGGTTAAGTCCCAGCAACGAGCGCAACCCTTGTTA<br/> TTAGTTGCCAGCATTAAAGTTGGGCACTCTAATGAGACTGCCGGTGACAAACCGGAGGAAGGTGGGGATGACGTCAAG<br/> TCATCATGCCCCCTTATGACCTGGGCTACACACGTGCTACAATGGGCAGTACAACGAGAAGCGAGCCTGCGAAGGCAA<br/> GCGAATCTCTGAAAGCTGTTCTCAGTTCGGACTGCAGTCTGCAACTCGACTGCACGAAGCTGGAATCGCTAGTAATCG<br/> CGGATCAGCACGCCGCGGTGAATACGTTCCCAGGGCCTTGTACACACCGCCCGTCACACCATGGGAGTCTGCAATGCC<br/> AAAGCCGGTGGCCTAACCTTAGGGAA</p> |
|  | ATCC 33820 | <p>GACGAACGCTGGCGGCGTGCCTAATACATGCAAGTTCGAGCGAGCGGAACTAACAGATTTACTTCGGTAATGACGTTA<br/> GGAAAGCGAGCGGCGGATGGGTGAGTAACACGTGGGGAACCTGCCCATAGTCTGGGATACCACTTGGAAACAGGTG<br/> CTAATACCGGATAAGAAAGCAGATCGCATGATCAGCTTTTAAAAGGCGGGCGTAAGCTGTCGCTATGGGATGGCCCCG<br/> CGGTGCATTAGCTAGTTGGTAAGGTAAGGCTTACCAAGGCGATGATGCATAGCCGAGTTGAGAGACTGATCGGCCA<br/> CATTGGGACTGAGACACGGCCCAAACCTCCTACGGGAGGCAGCAGTAGGGAATCTCCACAATGGACGCAAGTCTGAT<br/> GGAGCAACGCCGCGTGAGTGAAGAAGGTTTTCGGATCGTAAAGCTCTGTTGTTGGTGAAGAAGGATAGAGGTAGTAA<br/> CTGGCCTTTATTTGACGGTAATCAACCAGAAAGTCACGGCTAACTACGTGCCAGCAGCCGCGGTAATACGTAGGTGGC<br/> AAGCGTTGTCCGATTTATTGGGCGTAAAGCGAGCGCAGGCGGAAGAATAAGTCTGATGTGAAAGCCCTCGGCTTAA</p>                                                                                                                                                                                                                                                                                                                                                                                                                                                                                                                                                                                                                                                                                                                                                                                                                                                                                                             |

|  |            |                                                                                                                                                                                                                                                                                                                                                                                                                                                                                                                                                                                                                                                                                                                                                                                                                                                                                                                                                                                                                                                                                                                           |
|--|------------|---------------------------------------------------------------------------------------------------------------------------------------------------------------------------------------------------------------------------------------------------------------------------------------------------------------------------------------------------------------------------------------------------------------------------------------------------------------------------------------------------------------------------------------------------------------------------------------------------------------------------------------------------------------------------------------------------------------------------------------------------------------------------------------------------------------------------------------------------------------------------------------------------------------------------------------------------------------------------------------------------------------------------------------------------------------------------------------------------------------------------|
|  |            | <p>CCGAGGAACTGCATCGGAAACTGTTTTCTTGAGTGCAGAAGAGGAGAGTGGAACCTCCATGTGTAGCGGTGGAATGC<br/> GTAGATATATGGAAGAACACCAGTGGCGAAGGCGGCTCTCTGGTCTGCAACTGACGCTGAGGCTCGAAAGCATGGGT<br/> AGCGAACAGGATTAGATACCCTGGTAGTCCATGCCGTAACGATGAGTGCTAAGTGTGGGAGGTTCCGCCTCTCAG<br/> TGCTGCAGCTAACGCATTAAGCACTCCGCCTGGGGAGTACGACCGCAAGGTTGAAACTCAAAGGAATTGACGGGGGC<br/> CCGCACAAGCGGTGGAGCATGTGGTTTAATTCGAAGCAACGCGAAGAACCTTACCAGGTCTTGACATCTAGTGCCATT<br/> TGTAGAGATACAAAGTTCCCTTCGGGGACGCTAAGACAGGTGGTGCATGGCTGTCGTCAGCTCGTGTGCTGAGATGTT<br/> GGGTTAAGTCCCGCAACGAGCGCAACCCTTGTTATTAGTTGCCAGCATTAAAGTTGGGCACTCTAATGAGACTGCCGGT<br/> GACAAACCGGAGGAAGGTGGGGATGACGTCAAGTCATCATGCCCTTATGACCTGGGCTACACACGTGCTACAATGG<br/> GCAGTACAACGAGAAGCGAGCCTGCGAAGGCAAGCGAATCTCTGAAAGCTGTTCTCAGTTCCGACTGCAGTCTGCAA<br/> CTCGACTGCACGAAGCTGGAATCGCTAGTAATCGCGGATCAGCACGCCGCGGTGAATACGTTCCCGGGCCTTGACAC<br/> ACCGCCCGTCACACCATGGGAGTCTGCAATGCCCAAAGCCGGTGGCCTAACCTTCGGGAAGGAGCCGTCTAAGGCAG<br/> GGCAGATGACTGGGGTGAAGTCGTAACAAGGTAGCCGTAGGAGAACTGC</p>                                                                                                                |
|  | BJ H42-4   | <p>TCTGCACTCAAGAAAAACAGTTTCCGATGCAGTTCCTCGGTTAAGCCGAGGGCTTTCACATCAGACTTATTCTTCCGCG<br/> TGCGCTCGCTTACGCCAATAAATCCGGACAACGCTTGCCACCTACGTATTACCGCGGCTGCTGGCACGTAGTTAGC<br/> CGTGACTTTCTGGTTGATTACCGTCAAATAAAGGCCAGTTACTACCTCTATCCTTCTTACCAACAACAGAGCTTTACG<br/> ATCCGAAAACCTTCTTCACTCACGCGGCGTTGCTCCATCAGACTTGCCTCATTGTGGAAGATTCCCTACTGCTGCCTC<br/> CCGTAGGAGTTTGGGCCGTGTCTCAGTCCCAATGTGGCCGATCAGTCTCTCAACTCGGCTATGCATCATCGCCTTGGA<br/> AGCCTTTACCTTACCAACTAGCTAATGCACCGCGGGGCCATCCCATAGCGACAGCTTACGCCGCTTTTAAAAGCTGA<br/> TCATGCGATCTGCTTTCTTATCCGGTATTAGCACCTGTTTCCAAGTGGTATCCAGACTATGGGGCAGGTTCCCCACGT<br/> GTTACTCACCCATCCGCCGCTCGCTTTCCTAACGTCATTACCGAAGTAAATCTGTTAGTTCCGCTCGCTCGACTTGCAT<br/> GTATTAGGCACGCCGCCAGCGTTCGTCTGAGCCAT</p>                                                                                                                                                                                                                                                                                                                                                                                 |
|  | TMPC 9023F | <p>TAAGCATAGACGGCTATACATGCAAGTCGAGCGAGCGGAACTAACAGATTTACTTCCGGTAATGACGTTAGGAAAGCG<br/> AGCGGCGGATGGGTGAGTAACACGTGGGGAACCTGCCCCATAGTCTGGGATACCACTTGAAACAGGTGCTAATACC<br/> GGATAAGAAAGCAGATCGCATGATCAGTTTTAAAAGGCGGCGTAAGCTGTCGCTATGGGATGGCCCCGCGGTGCAT<br/> TAGCTAGTTGGTAAGGTAAAGGCTTACCAAGGCGATGATGCATAGCCGAGTTGAGAGACTGATCGGCCACATTGGGA<br/> CTGAGACACGGCCAACTCCTACGGGAGGCAGCAGTAGGGAATCTTCCACAATGGACGCAAGTCTGATGGAGCAAC<br/> GCCGCGTGAGTGAAGAAGGTTTTTCGGATCGTAAAGCTCTGTTGTTGGTGAAGAAGGATAGAGGTAGTAACTGGCCTTT<br/> ATTTGACGGTAATCAACCAGAAAGTCACGGCTAACTACGTGCCAGCAGCCGCGTAATACGTAGGTGGCAAGCGTTG<br/> TCCGGATTTATTGGGCGTAAAGCGAGCGCAGGCGGAAGAATAAGTCTGATGTGAAAGCCCTCGGCTTAAACCGAGGAA<br/> CTGCATCGGAAACTGTTTTCTTGAGTGCAGAAGAGGAGAGTGGAACCTCCATGTGTAGCGGTGGAATGCGTAGATATA<br/> TGGAAGAACACCAGTGGCGAAGGCGGCTCTCTGGTCTGCAACTGACGCTGAGGCTCGAAAGCATGGGTAGCGAACAG<br/> GATTAGATACCCTGGTAGTCCATGCCGTAACGATGAGTGCTAAGTGTGGGAGGTTTCCGCCTCTCAGTGTGCTGACG<br/> TAACGCATTAAGCACTCCGCCTGGGGAGTACGACCGCAAGGTTGAAACTCAAAGGAATTGACGGGGGCCCGCACAAG<br/> CGGTGGAGCATGTGGTTTAATTCGAAGCAACGCGAAGAACCTTACCAGGTCTTGACATCTAGTGCCATTTGTAGAGAT</p> |



|                              |            |                                                                                                                                                                                                                                                                                                                                                                                                                                                                                                                                                                                                                                                                                                                                                                                                                                                                                                                                                                                                                                                                                                                                                                                                                                                                                                                                                                                                                                                                                                                                                                                                                                                                                |
|------------------------------|------------|--------------------------------------------------------------------------------------------------------------------------------------------------------------------------------------------------------------------------------------------------------------------------------------------------------------------------------------------------------------------------------------------------------------------------------------------------------------------------------------------------------------------------------------------------------------------------------------------------------------------------------------------------------------------------------------------------------------------------------------------------------------------------------------------------------------------------------------------------------------------------------------------------------------------------------------------------------------------------------------------------------------------------------------------------------------------------------------------------------------------------------------------------------------------------------------------------------------------------------------------------------------------------------------------------------------------------------------------------------------------------------------------------------------------------------------------------------------------------------------------------------------------------------------------------------------------------------------------------------------------------------------------------------------------------------|
|                              |            | <p>ACAAAGTTCCTTCGGGGACGCTAAGACAGGTGGTGCATGGCTGTCGTCAGCTCGTGTGAGATGTTGGGTAAAGT<br/> CCCACAACGAGCGCAACCCTTGTTATTAGTTGCCAGCATTAAAGTTGGGCACCTAATGAGACTGCCGGTGACAAACCG<br/> GAGGAAGGTGGGGATGACGTCAAGTCATCATGCCCCTTATGACCTGGGCTACACACGTGCTACAATGGGCAGTACAA<br/> CGAGAAGCGAGCCTGCGAAGGCAAGCGAATCTCTGAAAGCTGTTCTCAGTTCGGACTGCAGTCTGCAACTCGACTGCA<br/> CGAAGCTGGAATCGCTAGTAATCGCGGATCAGCACGCCGCGGTGAATACGTTCCCGGGCCTTGACACACCGCCCGTC<br/> ACACCATGGGAGTCTGCAATGCCCAAAGCCGGTGGCCTAACCTTCGGGAAGGAGCCGTCTAAGGCAGGGCAGATGAC<br/> TGGGGTGAAGTCGTAACAAGAGCATTAC</p>                                                                                                                                                                                                                                                                                                                                                                                                                                                                                                                                                                                                                                                                                                                                                                                                                                                                                                                                                                                                                                                                                                                           |
| <i>Lactobacillus gasseri</i> | HDB1102    | <p>CGAACGCTGGCGGCGTGCCTAATACATGCAAGTCGAGCGAGCTTGCCTAGATGAATTTGGTGTTCACCAAATGAAA<br/> CTAGATAACAAGCGAGCGGCGGACGGGTGAGTAACACGTGGGTAACCTGCCCAAGAGACTGGGATAACACCTGGAAAC<br/> AGATGCTAATACCGGATAACAACACTAGACGCATGTCTAGAGTTTAAAAGATGGTTCTGCTATCACTCTTGGATGGAC<br/> CTGCGGTGCATTAGCTAGTTGGTAAGGTAACGGCTTACCAAGGCAATGATGCATAGCCGAGTTGAGAGACTGATCGGC<br/> CACATTGGGACTGAGACACGGCCAAACTCCTACGGGAGGCAGCAGTAGGGAATCTTCCACAATGGACGCAAGTCTG<br/> ATGGAGCAACGCCGCGTGAGTGAAGAAGGGTTTCGGCTCGTAAAGCTCTGTTGGTAGTGAAGAAAGATAGAGGTAGT<br/> AACTGGCCTTTATTTGACGGTAATTACTTAGAAAAGTCACGGCTAACTACGTGCCAGCAGCCGCGGTAATACGTAGGTG<br/> GCAAGCGTTGTCCGATTTATTGGGCGTAAAGCGAGTGCAGGCGGTTCAATAAGTCTGATGTGAAAGCCTTCGGCTCA<br/> ACCGGAGAATTGCATCAGAACTGTTGAACTTGAGTGCAGAAGAGGAGAGTGGAACTCCATGTGTAGCGGTGGAATG<br/> CGTAGATATATGGAAGAACCAGTGGCGAAGGCGGCTCTCTGGTCTGCAACTGACGCTGAGGCTCGAAAGCATGGG<br/> TAGCGAACAGGATTAGATACCCTGGTAGTCCATGCCGTAAACGATGAGTGCTAAGTGTGGGAGGTTTCCGCCTCTCA<br/> GTGCTGCAGCTAACGCATTAAGCACTCCGCCTGGGGAGTACGACCGCAAGGTTGAACTCAAAGGAATTGACGGGGG<br/> CCCGCACAAGCGGTGGAGCATGTGGTTTAATTCGAAGCAACGCGAAGAACCTTACCAGGTCTTGACATCCAGTGCAA<br/> ACCTAAGAGATTAGGAGTTCCTTCGGGGACGCTGAGACAGGTGGTGCATGGCTGTCGTCAGCTCGTGTGAGATG<br/> TTGGGTTAAGTCCCGCAACGAGCGCAACCCTTGTCAATTAGTTGCCATCATTAAAGTTGGGCACTCTAATGAGACTGCCG<br/> GTGACAAACCGGAGGAAGGTGGGGATGACGTCAAGTCATCATGCCCCTTATGACCTGGGCTACACACGTGCTACAAT<br/> GGACGGTACAACGAGAAGCGAACCTGCGAAGGCAAGCGGATCTCTGAAAGCCGTTCTCAGTTCGGACTGTAGGCTGC<br/> AACTCGCCTACACGAAGCTGGAATCGCTAGTAATCGCGGATCAGCACGCCGCGGTGAATACGTTCCCGGGCCTTGAC<br/> ACACCGCCCGTCACACCATGAGAGTCTGTAACACCCAAAGCCGGTGGGATAACCTTTATAGGAGTCAGCCGTCTAAGG<br/> TAGGACAGATGATTAGGGTGAATCTAAAAG</p> |
|                              | ATCC 33323 | <p>GAAAATGAGAGTTTGATCCTGGCTCAGGACGAACGCTGGCGGCGTGCCTAATACATGCAAGTCGAGCGAGCTTGCCT<br/> AGATGAATTTGGTGTTCACCAGATGAAACTAGATAACAAGCGAGCGGCGGACGGGTGAGTAACACGTGGGTAACCT<br/> GCCCAAGAGACTGGGATAACACCTGGAAACAGATGCTAATACCGGATAACAACACTAGACGCATGTCTAGAGTTTAA<br/> AAGATGGTTCTGCTATCACTCTTGGATGGACCTGCGGTGCATTAGCTAGTTGGTAAGGTAACGGCTTACCAAGGCAAT<br/> GATGCATAGCCGAGTTGAGAGACTGATCGGCCACATTGGGACTGAGACACGGCCAAACTCCTACGGGAGGCAGCAG<br/> TAGGGAATCTTCCACAATGGACGCAAGTCTGATGGAGCAACGCCGCGTGAGTGAAGAAGGGTTTCGGCTCGTAAAGC<br/> TCTGTTGGTAGTGAAGAAAGATAGAGGTAGTAACTGGCCTTTATTTGACGGTAATTACTTAGAAAAGTCACGGCTAACT</p>                                                                                                                                                                                                                                                                                                                                                                                                                                                                                                                                                                                                                                                                                                                                                                                                                                                                                                                                                                                                                                                                        |

|       |  |                                                                                                                                                                                                                                                                                                                                                                                                                                                                                                                                                                                                                                                                                                                                                                                                                                                                                                                                                                                                                                                                                                                                                                                                                                                                                                                                                                                                                                                                                            |
|-------|--|--------------------------------------------------------------------------------------------------------------------------------------------------------------------------------------------------------------------------------------------------------------------------------------------------------------------------------------------------------------------------------------------------------------------------------------------------------------------------------------------------------------------------------------------------------------------------------------------------------------------------------------------------------------------------------------------------------------------------------------------------------------------------------------------------------------------------------------------------------------------------------------------------------------------------------------------------------------------------------------------------------------------------------------------------------------------------------------------------------------------------------------------------------------------------------------------------------------------------------------------------------------------------------------------------------------------------------------------------------------------------------------------------------------------------------------------------------------------------------------------|
|       |  | <p>ACGTGCCAGCAGCCGCGGTAATACGTAGGTGGCAAGCGTTGTCCGGATTTATTGGGCGTAAAGCGAGTGCAGGCGGT<br/> TCAATAAGTCTGATGTGAAAGCCTTCGGCTCAACCGGAGAATTGCATCAGAACTGTTGAACTTGAGTGCAGAAGAG<br/> GAGAGTGGAATCCATGTGTAGCGGTGGAATGCGTAGATATATGGAAGAACACCAAGTGGCGAAGGCGGCTCTCTGGT<br/> CTGCAACTGACGCTGAGGCTCGAAAGCATGGGTAGCGAACAGGATTAGATACCCTGGTAGTCCATGCCGTAAACGAT<br/> GAGTGCTAAGTGTGGGAGGTTTCCGCCTCTCAGTGCTGCAGCTAACGCATTAAGCACTCCGCTGGGGAGTACGACC<br/> GCAAGGTTGAACTCAAAGGAATTGACGGGGGCCCGCACAAAGCGGTGGAGCATGTGGTTTAATTCGAAGCAACGCGA<br/> AGAACCTTACCAGGTCTTGACATCCAGTGCAAACCTAAGAGATTAGGTGTTCCCTTCGGGGACGCTGAGACAGGTGGT<br/> GCATGGCTGTCGTCAGCTCGTGTGAGATGTTGGGTTAAGTCCCGCAACGAGCGCAACCCCTGTCATTAGTTGCCAT<br/> CATTAAAGTTGGGCACTCTAATGAGACTGCCGGTGACAAACCGGAGGAAGGTGGGGATGACGTCAAGTCATCATGCC<br/> CTTATGACCTGGGCTACACACGTGCTACAATGGACGGTACAACGAGAAGCGAACCTGCGAAGGCAAGCGGATCTCTG<br/> AAAGCCGTTCTCAGTTCGGACTGTAGGCTGCAACTCGCCTACACGAAGCTGGAATCGCTAGTAATCGCGGATCAGCAC<br/> GCCGCGGTGAATACGTTCCCGGGCCTGTACACACCGCCCGTCACACCATGAGAGTCTGTAACACCCAAAGCCGGTGG<br/> GATAACCTTTATAGGAGTCAGCCGTCTAAGGTAGGACAGATGATTAGGGTGAAGTTCGTAACAAGGTAGCCGTAGGAG<br/> AACCTGCGGCTGGATCACCTCCTT</p>                                                                                                                                                                                                                                                                                                                                     |
| 896-2 |  | <p>AAACTGCAGTCGAGCGAGCTTGCCTAGATGAATTTGGTGTCTGCACCAGATGAACTAGATACAAGCGAGCGGCGGA<br/> CGGGTGAGTAACACGTGGGTAACCTGCCAAGAGACTGGGATAACACCTGGAAACAGATGCTAATACCGGATAACAA<br/> CACTAGACGCATGTCTAGAGTTTAAAAGATGGTTCTGCTATCACTCTTGGATGGACCTGCGGTGCATTAGCTAGTTGGT<br/> AAGGTAACGGCTTACCAAGGCAATGATGCATAGCCGAGTTGAGAGACTGATCGGCCACATTGGGACTGAGACACGGC<br/> CCAACTCCTACGGGAGGCAGCAGTAGGGAATCTTCCACAATGGACGCAAGTCTGATGGAGCAACGCCGCGTGAGTG<br/> AAGAAGGGTTTTCGGCTCGTAAAGCTCTGTTGGTAGTGAAGAAAGATAGAGGTAGTAACTGGCCTTTATTTGACGGTAA<br/> TACTTAGAAAAGTCACGGCTAACTACGTGCCAGCAGCCGCGTAATACGTAGGTGGCAAGCGTTGTCCGGATTTATTG<br/> GGCGTAAAGCGAGTGCAGGCGGTTCAATAAGTCTGATGTGAAAGCCTTCGGCTCAACCGGAGAATTGCATCAGAAAC<br/> TGTTGAACTTGAGTGCAGAAGAGGAGAGTGGAACTCCATGTGTAGCGGTGGAATGCGTAGATATATGGAAGAACACC<br/> AGTGCGAAGGCGGCTCTCTGGTCTGCAACTGACGCTGAGGCTCGAAAGCATGGGTAGCGAACAGGATTAGATACCC<br/> TGGTAGTCCATGCCGTAAACGATGAGTGCTAAGTGGTGGGAGGTTTCCGCCTCTCAGTGCTGCAGCTAACGCATTAAG<br/> CACTCCGCCTGGGAGTACGACCGCAAGGTTGAACTCAAAGGAATTGACGGGGGCCCGCACAAAGCGGTGGAGCATG<br/> TGGTTTAATTCGAAGCAACGCGAAGAACCTTACCAGGTCTTGACATCCAGTGCAAACCTAAGAGATTAGGTGTTCCCT<br/> TCGGGGACGCTGAGACAGGTGGTGCATGGCTGTCGTCAGCTCGTGTGAGATGTTGGGTTAAGTCCCGCAACGAGC<br/> GCAACCCTTGCATTAGTTGCCATCATTAAAGTTGGGCACTCTAATGAGACTGCCGGTGACAAACCGGAGGAAGGTGGG<br/> GATGACGTCAAGTCATCATGCCCTTATGACCTGGGCTACACACGTGCTACAATGGACGGTACAACGAGAAGCGAAC<br/> CTGCGAAGGCAAGCGGATCTCTGAAAGCCGTTCTCAGTTCGGACTGTAGGCTGCAACTCGCCTACACGAAGCTGGAAT<br/> CGCTAGTAATCGCCGA</p> |
| 545   |  | <p>CGCTGGCGGCGTGCCTAATACATGCAAGTCGAGCGAGCTTGCCTAGATGAATTTGGTGTCTGCACCAAATGAACTAG<br/> ATACAAGCGAGCGGCGGACGGGTGAGTAACACGTGGGTAACCTGCCAAGAGACTGGGATAACACCTGGAAACAGA</p>                                                                                                                                                                                                                                                                                                                                                                                                                                                                                                                                                                                                                                                                                                                                                                                                                                                                                                                                                                                                                                                                                                                                                                                                                                                                                                                      |

|                            |            |                                                                                                                                                                                                                                                                                                                                                                                                                                                                                                                                                                                                                                                                                                                                                                                                                                                                                                                                                                                                                                                                                                                                                                                                                                                                                                                                                                                                                                                                                                                                                                                                                                                                                                                                                      |
|----------------------------|------------|------------------------------------------------------------------------------------------------------------------------------------------------------------------------------------------------------------------------------------------------------------------------------------------------------------------------------------------------------------------------------------------------------------------------------------------------------------------------------------------------------------------------------------------------------------------------------------------------------------------------------------------------------------------------------------------------------------------------------------------------------------------------------------------------------------------------------------------------------------------------------------------------------------------------------------------------------------------------------------------------------------------------------------------------------------------------------------------------------------------------------------------------------------------------------------------------------------------------------------------------------------------------------------------------------------------------------------------------------------------------------------------------------------------------------------------------------------------------------------------------------------------------------------------------------------------------------------------------------------------------------------------------------------------------------------------------------------------------------------------------------|
|                            |            | <p>TGCTAATACCGGATAACAACACTAGACGCATGTCTAGAGTTTAAAAGATGGTTCTGCTATCACTCTTGGATGGACCTG<br/> CGGTGCATTAGCTAGTTGGTAAGGTAACGGCTTACCAAGGCAATGATGCATAGCCGAGTTGAGAGACTGATCGGCCA<br/> CATTGGGACTGAGACACGGCCAACTCCTACGGGAGGCAGCAGTAGGGAATCTTCCACAATGGACGCAAGTCTGAT<br/> GGAGCAACGCCGCGTGAGTGAAGAAGGGTTTCGGCTCGTAAAGCTCTGTTGGTAGTGAAGAAAGATAGAGGTAGTAA<br/> CTGGCCTTTATTTGACGGTAATTACTTAGAAAAGT</p>                                                                                                                                                                                                                                                                                                                                                                                                                                                                                                                                                                                                                                                                                                                                                                                                                                                                                                                                                                                                                                                                                                                                                                                                                                                                                                                                                                |
|                            | 345A       | <p>AGAGTTTGATCCTGGCTCAGGACGAACGCTGGCGGCGTGCCTAATACATGCAAGTCGAGCGAGCTTGCCTAGATGAAT<br/> TTGGTGCTTGCACCAAATGAAACTAGATACAAGCGAGCGGCGGACGGGTGAGTAACACGTGGGTAACCTGCCCAAGA<br/> GACTGGGATAACACCTGGAAACAGATGCTAATACCGGATAACAACACTAGACGCATGTCTAGAGTTTAAAAGATGGT<br/> TCTGCTATCACTCTTGGATGGACCTGCGGTGCATTAGCTAGTTGGTAAGGTAACGGCTTACCAAGGCAATGATGCATA<br/> GCCGAGTTGAGAGACTGATCGGCCACATTGGGACTGAGACACGGCCAACTCCTACGGGAGGCAGCAGTAGGGAAT<br/> CTTCCACAATGGACGCAAGTCTGATGGAGCAACGCCGCGTGAGTGAAGAAGGGTTTCGGCTCGTAAAGCTCTGTTGGT<br/> AGTGAAGAAAGATAGAGGTAGTAACTGGCCTTTATTTGACGGTAATTACTTAGAAAAGTCACGGCTAACTACGTGCCAG<br/> CAGCCGCGGTAATACGTAGGTGGCAAGCGTTGTCCGGATTTATTGGGCGTAAAGCGAGTGCAGGCGGTTCAATAAGTC<br/> TGATGTGAAAGCCTTCGGCTCAACCGGAGAATTGCATCAGAACTGTTGAACTTGAGTGCAGAAGAGGAGAGTGGAA<br/> CTCCATGTGTAGCGGTGGAATGCGTAGATATATGGAAGAACCAGTGGCGAAGGCGGCTCTCTGGTCTGCAACTGAC<br/> GCTGAGGCTCGAAAGCATGGGTAGCGAACAGGATTAGATACCCTGGTAGTCCATGCCGTAACGATGAGTGTCTAAGT<br/> GTTGGGAGGTTTCCGCCTCTCAGTGCTGCAGCTAACGCATTAAGCACTCCGCCTGGGGAGTACGACCGCAAGGTTGAA<br/> ACTCAAAGGAATTGACGGGGGCCCCGACAAAGCGGTGGAGCATGTGGTTTAAATTCGAAGCAACGCGAAGAACCTTACC<br/> AGGTCTTGACATCCAGTGCAAACCTAAGAGATTAGGTGTTCCCTTCGGGGACGCTGAGACAGGTGGTGCATGGCTGTC<br/> GTCAGCTCGTGTCTGAGATGTTGGGTTAAGTCCCAGCAACGAGCGCAACCCTTGTATTAGTTGCCATCATTAGTTGG<br/> GCACTCTAATGAGACTGCCGGTGACAAACCGGAGGAAGGTGGGGATGACGTCAAGTCATCATGCCCTTATGACCTG<br/> GGCTACACACGTGCTACAATGGACGGTACAACGAGAAGCGAACCTGCGAAGGTAAGCGGATCTCTGAAAGCCGTTCT<br/> CAGTTCGGACTGTAGGCTGCAACTCGCCTACACGAAGCTGGAATCGCTAGTAATCGCGGATCAGCACGCCGCGGTGA<br/> ATACGTTCCCGGGCCTTGTACACACCGCCCGTCACACCATGAGAGTCTGTAACACCCAAAGCCGGTGGGATAACCTTT<br/> ATAGGAGTCAGCCGTCTAAGGTAGGACAGATGATTAGGTTGAAGTCGTAACAAGGTAGCCGTAGGAGAACCCTGCGGC<br/> TGGATCACCT</p> |
| <i>Lactobacillus iners</i> | LC483559.1 | <p>GGCTCAGGACGAACGCTGGCGGCGTGCCTAATACATGCAAGTCGAGCGAGTCTGCCTTGAAGATCGGAGTGCTTGCA<br/> CTCTGTGAAACAAGATACAGGCTAGCGGCGGACGGGTGAGTAACACGTGGGTAACCTGCCCAAGAGATCGGGATAAC<br/> ACCTGGAACAGATGCTAATACCGGATAACAACAGATGATGCCTATCAACTGTTTAAAAGATGGTTCTGCTATCACTC<br/> TTGGATGGACCTGCGGTGCATTAGCTAGTTGGTAGGGTAACGGCCTACCAAGGCGATGATGCATAGCCGAGTTGAGA<br/> GACTGATCGGCCACATTGGGACTGAGACACGGCCAACTCCTACGGGAGGCAGCAGTAGGGAATCTTCCACAATGG<br/> ACGCAAGTCTGATGGAGCAACGCCGCGTGAGTGAAGAAGGGTTTCGGCTCGTAAAGCTCTGTTGTTGGTGAAGAAGG<br/> ACAGGGGTAGTAACTGACCTTTGTTTACGGTAATCAATTAGAAAAGTCACGGCTAACTACGTGCCAGCAGCCGCGGTA<br/> ATACGTAGGTGGCAAGCGTTGTCCGGATTTATTGGGCGTAAAGCGAGTGCAGGCGGCTCGATAAGTCTGATGTGAAA</p>                                                                                                                                                                                                                                                                                                                                                                                                                                                                                                                                                                                                                                                                                                                                                                                                                                                                                                                                                                                                                                                             |

|  |            |                                                                                                                                                                                                                                                                                                                                                                                                                                                                                                                                                                                                                                                                                                                                                                                                                                                                                                                                                                                                                                                                                                                                                                                                                                                                                                                                                                                                                                                                                                                                                                                                                                                                  |
|--|------------|------------------------------------------------------------------------------------------------------------------------------------------------------------------------------------------------------------------------------------------------------------------------------------------------------------------------------------------------------------------------------------------------------------------------------------------------------------------------------------------------------------------------------------------------------------------------------------------------------------------------------------------------------------------------------------------------------------------------------------------------------------------------------------------------------------------------------------------------------------------------------------------------------------------------------------------------------------------------------------------------------------------------------------------------------------------------------------------------------------------------------------------------------------------------------------------------------------------------------------------------------------------------------------------------------------------------------------------------------------------------------------------------------------------------------------------------------------------------------------------------------------------------------------------------------------------------------------------------------------------------------------------------------------------|
|  |            | <p>GCCTTCGGCTCAACCGGAGAATTGCATCAGAACTGTCGAGCTTGAGTACAGAAGAGGAGAGTGGAACCTCCATGTGT<br/> AGCGGTGAAATGCGTAGATATATGGAAGAACACCGGTGGCGAAGGCGGCTCTCTGGTCTGTTACTGACGCTGAGGCT<br/> CGAAAGCATGGGTAGCGAACAGGATTAGATACCCTGGTAGTCCATGCCGTAAACGATGAGTGCTAAGTGTGGGAGG<br/> TTTCCGCCTCTCAGTGCTGCAGCTAACGCATTAAGCACTCCGCCTGGGGAGTACGACCGCAAGGTTGAAACTCAAAGG<br/> AATTGACGGGGGCCCCGCACAAGCGGTGGAGCATGTGGTTTAATTCGAAGCAACGCGAAGAACCTTACCAGGTCTTGA<br/> CATCCATAGCCAGTCTAAGAGATTAGATGTTCCCTTCGGGGACTATGAGACAGGTGGTGCATGGCTGTCGTCAGCTCG<br/> TGTCGTGAGATGTTGGGTTAAGTCCCGCAACGAGCGCAACCCTTGTCAATTAGTTGCCAGCATTAAAGTTGGGCACTCTA<br/> ATGAGACTGCCGGTGACAAACCGGAGGAAGGTGGGGATGACGTCAAGTCATCATGCCCTTATGACCTGGGCTACAC<br/> ACGTGCTACAATGGACGGTACAACGAGAAGCGACCCTGTGAAGGCAAGCGGATCTCTGAAAGCCGTTCTCAGTTCGG<br/> ATTGCAGGCTGCAACTCGCCTGCATGAAGCTGGAATCGCTAGTAATCGCAAATCAGCACGTTGCGGTGAATACGTTCC<br/> CGGGCCTTGTACACACCGCCCGTCACACCATGAGAGTCTGTAACGCCCGAAGCCGGCGGGATAACCGAAAGGAGTCA<br/> GCCGTCTAAGGCGGGACAGATGATTAGGGTGAAGTCC</p>                                                                                                                                                                                                                                                                                                                                                                                                                                                                                                                                                                                                                                                               |
|  | AY526083.1 | <p>GACGAACGCTGGCGGCGTGCCTAATACATGCAAGTCGAGCGAGTCTGCCTTGAAGATCGGAGTGCTTGCCTCTGTGA<br/> AACAAAGATACAGGCTAGCGGCGGACGGGTGAGTAACACGTGGGTAACCTGCCAAGAGATCGGGATAACACCTGGA<br/> AACAGATGCTAATACCGGATAACAACAGATGATGCCTATCAACTGTTTAAAAGATGGTTCTGCTATCACTCTTGATG<br/> GACCTGCGGTGCATTAGCTAGTTGGTAGGGTAACGGCCTACCAAGGCGATGATGCATAGCCGAGTTGAGAGACTGAT<br/> CGGCCACATTGGGACTGAGACACGGCCCAAACCTCCTACGGGAGGCAGCAGTAGGGAATCTTCCACAATGGACGCAAG<br/> TCTGATGGAGCAACGCCGCGTGAGTGAAGAAGGGTTTCGGCTCGTAAAGCTCTGTTGTTGGTGAAGAAGGACAGGGG<br/> TAGTAACTGACCTTTGTTGACGGTAATCAATTAGAAAGTCACGGCTAACTACGTGCCAGCAGCCGCGGTAATACGTA<br/> GGTGGCAAGCGTTGTCCGGATTTATTGGGCGTAAAGCGAGTGCAGGCGGCTCGATAAGTCTGATGTGAAAGCCTTCGG<br/> CTCAACCGGAGAATTGCATCAGAACTGTCGAGCTTGAGTACAGAAGAGGAGAGTGGAACCTCCATGTGTAGCGGTGA<br/> AATGCGTAGATATATGGAAGAACACCGGTGGCGAAGGCGGCTCTCTGGTCTGTTACTGACGCTGAGGCTCGAAAGCA<br/> TGGGTAGCGAACAGGATTAGATACCCTGGTAGTCCATGCCGTAAACGATGAGTGCTAAGTGTGGGAGGTTTCCGCCT<br/> CTCAGTGCTGCAGCTAACGCATTAAGCACTCCGCCTGGGGAGTACGACCGCAAGGTTGAAACTCAAAGGAATTGACG<br/> GGGGCCCCGCACAAGCGGTGGAGCATGTGGTTTAATTCGAAGCAACGCGAAGAACCTTACCAGGTCTTGACATCCATA<br/> GCCAGTCTAAGAGATTAGATGTTCCCTTCGGGGACTATGAGACAGGTGGTGCATGGCTGTCGTCAGCTCGTGTCTGTA<br/> GATGTTGGGTTAAGTCCCCGCAACGAGCGCAACCCTTGTCAATTAGTTGCCAGCATTAAAGTTGGGCACTCTAATGAGACT<br/> GCCGGTGACAAACCGGAGGAAGGTGGGGATGACGTCAAGTCATCATGCCCTTATGACCTGGGCTACACACGTGCTA<br/> CAATGGACGGTACAACGAGAAGCGACCCTGTGAAGGCAAGCGGATCTCTGAAAGCCGTTCTCAGTTCGGATTGCAGG<br/> CTGCAACTCGCCTGCATGAAGCTGGAATCGCTAGTAATCGCAAATCAGCACGTTGCGGTGAATACGTTCCCGGGCCTT<br/> GTACACACCGCCCGTCACACCATGAGAGTCTGTAACGCCCGAAGCCGGCGGGATAACCGAAAGGAGTCAGCCGTCTA<br/> AGGCGGGAC</p> |
|  | DSM 13335  | <p>TGGCTCAGGACGAACGCTGGCGGCGTGCCTAATACATGCAAGTCGAGCGAGTCTGCCTTGAAGATCGGAGTGCTTGCA<br/> CTCTGTGAAACAAGATACAGGCTAGCGGCGGACGGGTGAGTAACACGTGGGTAACCTGCCAAGAGATCGGGATAAC</p>                                                                                                                                                                                                                                                                                                                                                                                                                                                                                                                                                                                                                                                                                                                                                                                                                                                                                                                                                                                                                                                                                                                                                                                                                                                                                                                                                                                                                                                                                          |

|    |  |                                                                                                                                                                                                                                                                                                                                                                                                                                                                                                                                                                                                                                                                                                                                                                                                                                                                                                                                                                                                                                                                                                                                                                                                                                                                                                                                                                                                                                                                                                                                                    |
|----|--|----------------------------------------------------------------------------------------------------------------------------------------------------------------------------------------------------------------------------------------------------------------------------------------------------------------------------------------------------------------------------------------------------------------------------------------------------------------------------------------------------------------------------------------------------------------------------------------------------------------------------------------------------------------------------------------------------------------------------------------------------------------------------------------------------------------------------------------------------------------------------------------------------------------------------------------------------------------------------------------------------------------------------------------------------------------------------------------------------------------------------------------------------------------------------------------------------------------------------------------------------------------------------------------------------------------------------------------------------------------------------------------------------------------------------------------------------------------------------------------------------------------------------------------------------|
|    |  | <p>ACCTGGAACAGATGCTAATACCGGATAACAACAGATGATGCCTATCAACTGTTTAAAAGATGGTTCTGCTATCACTC<br/> TTGGATGGACCTGCGGTGCATTAGCTAGTTGGTAGGGTAACGGCCTACCAACGCGATGATGCATAGCCGAGTTGAGAG<br/> ACTGATCGGCCACATTGGGACTGAGACACGGCCAACTCCTACGGGAGGCAGCAGTAGGGAATCTTCCACAATGGA<br/> CGCAAGTCTGATGGAGCAACGCCGCGTGAGTGAAGAAGGGTTTCGGCTCGTAAAGCTCTGTTGTTGGTGAAGAAGGA<br/> CAGGGGTAGTAACTGACCTTTGTTTGACGGTAATCAATTAGAAAGTCACGGCTAACTACGTGCCAGCAGCCGCGGTAA<br/> TACGTAGGTGGCAAGCGTTGTCCGGATTTATTGGGCGTAAAGCGAGTGCAGGCGGCTCGATAAGTCTGATGTGAAAGC<br/> CTTCGGCTCAACCGGAGAATTGCATCAGAACTGTGCGAGCTTGAGTACAGAAGAGGAGAGTGGAACTCCATGTGTAG<br/> CGGTGAAATGCGTAGATATATGGAAGAACACCGGTGGCGAAGGCGGCTCTCTGGTCTGTTACTGACGCTGAGGCTCG<br/> AAAGCATGGGTAGCGAACAGGATTAGATACCCTGGTAGTCCATGCCGTAAACGATGAGTGCTAAGTGTGGGAGGTT<br/> TCCGCCTCTCAGTGCTGCAGCTAACGCATTAAGCACTCCGCCTGGGGAGTACGACCGCAAGGTTGAAACTCAAAGGAA<br/> TTGACGGGGGCCCGCACAAGCGGTGGAGCATGTGGTTTAATTGGAAGCAACGCGAAGAACCTTACCAGGTCTTGACA<br/> TCCATAGCCAGTCTAAGAGATTAGATGTTCCCTTCGGGGACTATGAGACAGGTGGTGCATGGCTGTCGTCAGCTCGTG<br/> TCGTGAGATGTTGGGTTAAGTCCCGCAACGAGCGCAACCCTTGTCATTAGTTGCCAGCATTAAAGTTGGGCACTCTAAT<br/> GAGACTGCCGGTGACAAACCGGAGGAAGGTGGGGATGACGTCAAGTCATCATGCCCTTATGACCTGGGCTACACAC<br/> GTGCTACAATGGACGGTACAACGAGAAGCGACCCTGTGAAGGCAAGCGGATCTCTGAAAGCCGTTCTCAGTTTCGGAT<br/> TGCAGGCTGCAACTCGCCTGCATGAAGCTGGAATCGCTAGTAATCGAAATCAGCACGTTGCGGTGAATACGTTCCCG<br/> GGCCTTGTACACACCGCCCGTCACACCATGAGAGTCTGTAACGCCCGAAGCCGGCGGGATAACCGAAAGGAGTCAAGC<br/> CGTCTAAGGCGGGACAGATGATTAGGGTGAAGTCGTAACAAGGTAGCCGTAGGAGAACCTGCGGCTG</p> |
| L1 |  | <p>CTATACTGCAGTCGAGCGAGTCTGCCTTGAAGATCGGAGTGCTTGCCTCTGTGAAACAAGATACAGGCTAGCGGCGG<br/> ACGGGTGAGTAACACGTGGGTAACCTGCCAAGAGATCGGGATAACACCTGGAACAGATGCTAATACCGGATAACA<br/> ACAGATGATGCCTATCAACTGTTTAAAAGATGGTTCTGCTATCACTCTTGGATGGACCTGCGGTGCATTAGCTAGTTGG<br/> TAGGGTAACGGCCTACCAAGGCGATGATGCATAGCCGAGTTGAGAGACTGATCGGCCACATTGGGACTGAGACACGG<br/> CCCAAACCTCCTACGGGAGGCAGCAGTAGGGAATCTTCCACAATGGACGCAAGTCTGATGGAGCAACGCCGCGTGAGT<br/> GAAGAAGGGTTTCGGCTCGTAAAGCTCTGTTGTTGGTGAAGAAGGACAGGGGTAGTAACTGACCTTTGTTGACGGTA<br/> ATCAATTAGAAAGTCACGGCTAACTACGTGCCAGCAGCCGCGGTAATACGTAGGTGGCAAGCGTTGTCCGGATTTATT<br/> GGGCGTAAAGCGAGTGCAGGCGGCTCGATAAGTCTGATGTGAAAGCCTTCGGCTCAACCGGAGAATTGCATCAGAAA<br/> CTGTGCGAGCTTGAAGTACAGAAGAGGAGAGTGGAACTCCATGTGTAGCGGTGAAATGCGTAGATATATGGAAGAACAC<br/> CGGTGGCGAAGGCGGCTCTCTGGTCTGTTACTGACGCTGAGGCTCGAAAGCATGGGTAGCGAACAGGATTAGATACC<br/> CTGGTAGTCCATGCCGTAAACGATGAGTGCTAAGTGTGGGAGGTTTCGGCTCTCAGTGCTGCAGCTAACGCATTAA<br/> GCACTCCGCCTGGGGAGTACGACCGCAAGGTTGAAACTCAAAGGAATTGACGGGGGCCCGCACAAGCGGTGGAGCAT<br/> GTGGTTTAATTGGAAGCAACGCGAAGAACCTTACCAGGTCTTGACATCCATAGCCAGTCTAAGAGATTAGATGTTCCC<br/> TTCGGGGACTATGAGACAGGTGGTGCATGGCTGTCGTCAGCTCGTGTGTCGTGAGATGTTGGGTTAAGTCCCGCAACGAG<br/> CGCAACCCTTGTATTAGTTGCCAGCATTAAAGTTGGGCACTCTAATGAGACTGCCGGTGACAAACCGGAGGAAGGTGG<br/> GGATGACGTCAAGTCATCATGCCCTTATGACCTGGGCTACACACGTGCTACAATGGACGGTACAACGAGAAGCGAC</p>                                                                                                                                                           |

|                                   |        |                                                                                                                                                                                                                                                                                                                                                                                                                                                                                                                                                                                                                                                                                                                                                                                                                                                                                                                                                                                                                                                                                                                                                                                                                                                                                                                                                  |
|-----------------------------------|--------|--------------------------------------------------------------------------------------------------------------------------------------------------------------------------------------------------------------------------------------------------------------------------------------------------------------------------------------------------------------------------------------------------------------------------------------------------------------------------------------------------------------------------------------------------------------------------------------------------------------------------------------------------------------------------------------------------------------------------------------------------------------------------------------------------------------------------------------------------------------------------------------------------------------------------------------------------------------------------------------------------------------------------------------------------------------------------------------------------------------------------------------------------------------------------------------------------------------------------------------------------------------------------------------------------------------------------------------------------|
|                                   |        | CCTGTGAAGGCAAGCGGATCTCTGAAAGCCGTTCTCAGTTCGGATTGCAGGCTGCAACTCGCCTGCATGAAGCTGGAA<br>TCGCTAGTAATCGCAAATCAGCACGTTGCGGTGAATACGTTCCCGGGCCTTGTACACACCGCCCGTCACACCATGAGA<br>GTCTGTAAACGCCCGAAGCCGGCGGGATAACCGAAAGGAGTCAGCCGTCTAGTC                                                                                                                                                                                                                                                                                                                                                                                                                                                                                                                                                                                                                                                                                                                                                                                                                                                                                                                                                                                                                                                                                                                       |
| <i>Lactobacillus<br/>jensenii</i> | 70(02) | AGAGTTTGATCCTGGCTCAGGACGAACGCTGGCGGCGTGCCTAATACATGCAAGTCGAGCGAGCTTGCCTATAGAAAT<br>TCTTCGGAATGGACATAGATAACAAGCTAGCGGCGGATGGGTGAGTAACGCGTGGGTAACCTGCCCTTAAGTCTGGGAT<br>ACCATTTGGAAACAGATGCTAATACCGGATAAAAGCTACTTTTCGCATGAAAGAAGTTTAAAAGGCGGCGTAAGCTGT<br>CGCTAAAGGATGGACCTGCGATGCATTAGCTAGTTGGTAAGGTAACGGCTTACCAAGGCGATGATGCATAGCCGAGTT<br>GAGAGACTGATCGGCCACATTGGGACTGAGACACGGCCCAAACCTCTACGGGAGGCAGCAGTAGGGAATCTTCCACA<br>ATGGACGAAAGTCTGATGGAGCAACGCCGCGTGAGTGAAGAAGGTTTTTCGGATCGTAAAGCTCTGTTGTTGGTGAAG<br>AAGGATAGAGGTAGTAACCTGGCCTTTATTTGACGGTAATCAACCAGAAAGTCACGGCTAACTACGTGCCAGCAGCCG<br>CGGTAATACGTAGGTGGCAAGCGTTGTCCGGATTTATTGGGCGTAAAGCGAGCGCAGGCGGATTGATAAGTCTGATGT<br>GAAAGCCTTCGGCTCAACCGAAGAACTGCATCAGAAACTGTCAATCTTGAGTGCAGAAGAGGAGAGTGGAACCTCCAT<br>GTGTAGCGGTGGAATGCGTAGATATATGGAAGAACACCAGTGGCGAAGGCGGCTCTCTGGTCTGTAACCTGACGCTGA<br>GGCTCGAAAGCATGGGTAGCGAACAGGATTAGATACCCTGGTAGTCCATGCCGTAACGATGAGTGCTAAGTGTGG<br>GAGGTTTCCGCCTCTCAGTGCTGCAGCTAACGCATTAAGCACTCCGCCTGGGGAGTACGACCGCAAGGTTGAAACTCA<br>AAGGAATTGACGGGGGCCCCGACAAAGCGGTGGAGCATGTGGTTTAATTCGAAGCAACGCGAAGAACCTTACCAGGTC<br>TTGACATCCTTTGACCACCTAAGAGATTAGGTTTTCCCTTCGGGGACAAAGAGACAGGTGGTGCATGGCTGTCGTCAG<br>CTCGTGTCTGAGA                                                                                                                                           |
|                                   | 17051  | TGCAAGTCGAGCGAGCTTGCCTATTGAAATTCTTCGGAATGGACATAGATAACAAGCTAGCGGCGGATGGGTGAGTAA<br>CGCGTGGGTAACCTGCCCTTAAGTCTGGGATACCATTTGGAAACAGATGCTAATACCGGATAAAAGCTACTTTCGCAT<br>GAAAGAAGTTTAAAAGGCGGCGTAAGCTGTCGCTAAAGGATGGACCTGCGATGCATTAGCTAGTTGGTAAGGTAACG<br>GCTTACCAAGGCGATGATGCATAGCCGAGTTGAGAGACTGATCGGCCACATTGGGACTGAGACACGGCCCAAACCTCC<br>TACGGGAGGCAGCAGTAGGGAATCTTCCACAATGGACGCAAGTCTGATGGAGCAACGCCGCGTGAGTGAAGAAGGTT<br>TTCGGATCGTAAAGCTCTGTTGTTGGTGAAGAAGGATAGAGGTAGTAACTGGCCTTTATTTGACGGTAATCAACCAGA<br>AAGTCACGGCTAACTACGTGCCAGCAGCCGCGGTAATACGTAGGTGGCAAGCGTTGTCCGGATTTATTGGGCGTAAAG<br>CGAGCGCAGGCGGATTGATAAGTCTGATGTGAAAGCCTTCGGCTCAACCGAAGAACTGCATCAGAAACTGTCAATCTT<br>GAGTGCAGAAGAGGAGAGTGGAACCTCATGTGTAGCGGTGGAATGCGTAGATATATGGAAGAACACCAGTGGCGAA<br>GGCGGCTCTCTGGTCTGTAACCTGACGCTGAGGCTCGAAAGCATGGGTAGCGAACAGGATTAGATACCCTGGTAGTCCA<br>TGCCGTAACGATGAGTGCTAAGTGTGGGAGGTTCCGCCTCTCAGTGCTGCAGCTAACGCATTAAGCACTCCGCCT<br>GGGGAGTACGACCGCAAGGTTGAAACTCAAAGGAATTGACGGGGGCCCCGACAAAGCGGTGGAGCATGTGGTTTAATT<br>CGAAGCAACGCGAAGAACCTTACCAGGTTGACATCCTTTGACCACCTAAGAGATTAGGTTTTCCCTTCGGGGACAA<br>AGAGACAGGTGGTGCATGGCTGTCGTCAGCTCGTGTGAGATGTTGGGTTAAGTCCCGCAACGAGCGCAACCCCTTG<br>TTAATAGTTGCCAGCATTAAAGTTGGGCACTCTATTGAGACTGCCGGTGACAAACCGGAGGAAGGTGGGGATGACGTC<br>AAGTCATCATGCCCTTATGACCTGGGCTACACACGTGCTACAATGGGCAGTACAACGAGAAGCGAACCTGTGAAGG |

|  |            |                                                                                                                                                                                                                                                                                                                                                                                                                                                                                                                                                                                                                                                                                                                                                                                                                                                                                                                                                                                                                                                                                                                                                                                                                                                                                                                                                                                                                                                                                                                                                                                                                         |
|--|------------|-------------------------------------------------------------------------------------------------------------------------------------------------------------------------------------------------------------------------------------------------------------------------------------------------------------------------------------------------------------------------------------------------------------------------------------------------------------------------------------------------------------------------------------------------------------------------------------------------------------------------------------------------------------------------------------------------------------------------------------------------------------------------------------------------------------------------------------------------------------------------------------------------------------------------------------------------------------------------------------------------------------------------------------------------------------------------------------------------------------------------------------------------------------------------------------------------------------------------------------------------------------------------------------------------------------------------------------------------------------------------------------------------------------------------------------------------------------------------------------------------------------------------------------------------------------------------------------------------------------------------|
|  |            | CAAGCGGATCTCTTAAAGCTGTTCTCAGTTCGGACTGTAGGCTGCAACTCGCCTACACGAAGCTGGAATCGCTAGTAA<br>TCGCGGATCAGCACGCCGCGGTGAATACGTTCCCGGGCCTTGTACACACCGCCCGTCACACCATGAGAGTTTGTAAACA<br>CCCAAAGTCGGTGAGGTAACCTTTGGAGCCAGCCGCCTAAG                                                                                                                                                                                                                                                                                                                                                                                                                                                                                                                                                                                                                                                                                                                                                                                                                                                                                                                                                                                                                                                                                                                                                                                                                                                                                                                                                                                                          |
|  | ATCC 25258 | TGCCTAATACATGCAAGTCGAGCGAGCTTGCCTATAGAAGTTCTTCGGAATGGAAATAGATACAAGCTAGCGGCGGAT<br>GGGTGAGTAACGCGTGGGTAACCTGCCCTTAAGTCTGGGATACCATTTGGAAACAGATGCTAATACCGGATAAAAGCT<br>ACTTTCGCATGAAAGAAGTTTAAAAGGCGGCGTAAGCTGTTCGTAAAGGATGGACTTGCATGCATTAGCTAGTTGGTA<br>AGGTAACGGCTTACCAAGGCTGATGATGCATAGCCGAGTTGAGAGACTGATCGGCCACATTGGGACTGAGACACGGC<br>CCAAACTCCTACGGGAGGCAGCAGTAGGGAATCTCCACAATGGACGAAAGTCTGATGGAGCAACGCCGCGTGAGTG<br>AAGAAGTTTTTCGGATCGTAAAGCTCTGTTGTTGGTGAAGAAGGATAGAGGTAGTAAGTGGCCTTTATTTGACGGTAA<br>TCAACCAGAAAGTCACGGCTAACTACGTGCCAGCAGCCGCGGTAATACGTAGGTGGCAAGCGTTGTCCGATTTATTG<br>GGCGTAAAGCGAGCGCAGGCGGATTGATAAGTCTGATGTGAAAGCCTTCGGCTCAACCGAAGAAGTGCATCAGAAAC<br>TGTCATCTTGAGTGCAGAAGAGGAGAGTGGAACTCCATGTGTAGCGGTGGAATGCGTAGATATATGGAAGAACC<br>AGTGGCGAAGGCGGCTCTCTGGTCTGTAAGTACGCTGAGGCTCGAAAGCATGGGTAGCGAACAGGATTAGATACCC<br>TGGTAGTCCATGCCGTAACGATGAGTGCTAAGTGTGGGAGGTTCCGCCTCTCAGTGCTGCAGCTAACGCATTAAG<br>CACTCCGCCTGGGGAGTACGACCGCAAGGTTGAAACTCAAAGGAATTGACGGGGGCCCGCACAAAGCGGTGGAGCATG<br>TGGTTAATTGAAGCAACGCGAAGAACCCTTACCAGGCTTACATCCTTTGACCACCTAAGAGATTAGGTTTTCCCTT<br>CGGGGACAAAGAGACAGGTGGTGCATGGCTGTCGTCAGCTCGTGTGAGATGTTGGGTTAAGTCCCGCAACGAGC<br>GCAACCCTTGTTAATAGTTGCCAGCATTAAAGTTGGGCACTCTATTGAGACTGCCGGTGACAAACCGGAGGAAGGTGGG<br>GATGACGTCAAGTCATCATGCCCTTATGACCTGGGCTACACACGTGCTACAATGGGCAGTACAACGAGAAGCGAAC<br>CTGTGAAGGCAAGCGGATCTCTTAAAGCTGTTCTCAGTTCGGACTGTAGGCTGCAACTCGCCTACACGAAGCTGGAAT<br>CGCTAGTAATCGCGGATCAGCACGCCGCGGTGAATACGTTCCCGGGCCTTGTACACACCGCCCGTCACACCATGAGAG<br>TTTGTAACACCCAAAGTCGGTGAGGTAACCTTTGGAGCCAGCCGCCTAAGGTGGGACAGATGATTAGGGTGAAGTCGT<br>AACAAAGGTAGCCGTAGGAGAA |
|  | NP8998F    | CAAGTCGAGCGAGCTTTGCCTATAGAATTCTTYGGAATGGACATAKATACWAGCTWKYGGCGGATGGGTGAGTAAC<br>GCGTGGGTAACCTGCCCTTAAGTCTGGGATACCATTTGGAAACAGATGCTAATACCGGATAAAAGCTACTTTCGCATG<br>AAAGAAGTTTAAAAGGCGGCGTAAGCTGTCKCTAAAGGATGGACCTGCGATGCATTAGCTAGTTGGTAAGGTAACGG<br>CTTACCAAGGCGATGATGCATAGCCGAGTTGAGAGACTGATCGGCCACATTGGGACTGAGACACGGCCCAAACCTCT<br>ACGGGAGGCAGCAGTAKGGAATCTCCACAATGGACGAAAGTCTGATGGAGCAACGCCGCGTGAGTGAAGAAGGTTT<br>TCGGATCGTAAAGCTCTGTTGTTGGTGAAGAAGGATAGAGGTAGTAAGTGGCCTTTATTTGACGGTAATCAACCAGAA<br>AGTCACGGCTAACTACGTGCCAGCAGCCGCGGTAATACGTAGGTGGCAWGCCTTGTCCGATTTATTGGGCGTAAAG<br>CGAGCGCAGGCGGATTGATAAGTCTGATGTGAAAGCCTTCGGCTCAACCGAAGAAGTGCATCAGAAACTGTCAATCTT<br>GAGTGCAGAAGAGGAGAGTGGAACTCCATGTGTAGCGGTGGAATGCGTAGATATATGGAAGAACCAGTGGCGAA<br>KGCAGCTCTCTGKTCTGTAAGTACGCTGAGGCTCGAAAGCATGGGTAGCGAACAGGATTAGATACCCTGGTAKTCCA<br>TGCCGTAACGATGAGTGCTAAGTGTGGGAGKTTYCCGCCTCTCAGTGCTGCWCTAACGCATTAAWCACTCCGCCTG                                                                                                                                                                                                                                                                                                                                                                                                                                                                                                                                                                                                                                                                                                     |

|                                            |                       |                                                                                                                                                                                                                                                                                                                                                                                                                                                                                                                                                                                                                                                                                                                                                                                                                                                                                                                                                                                                                                                                                                                                                                                                                                                                                                                                                                                                                                                                                                                                                                                                                                                                               |
|--------------------------------------------|-----------------------|-------------------------------------------------------------------------------------------------------------------------------------------------------------------------------------------------------------------------------------------------------------------------------------------------------------------------------------------------------------------------------------------------------------------------------------------------------------------------------------------------------------------------------------------------------------------------------------------------------------------------------------------------------------------------------------------------------------------------------------------------------------------------------------------------------------------------------------------------------------------------------------------------------------------------------------------------------------------------------------------------------------------------------------------------------------------------------------------------------------------------------------------------------------------------------------------------------------------------------------------------------------------------------------------------------------------------------------------------------------------------------------------------------------------------------------------------------------------------------------------------------------------------------------------------------------------------------------------------------------------------------------------------------------------------------|
|                                            |                       | <p>GGGAGTACGACCGCAAGGTTGAAACTMAAGGAATTGACGSGGGCCCGCMCAGCGGTGGAGCATGTGGTTTAATTCSA<br/> AGCACGCKAAKACCTTACMGGYCTTGACATCCTTTGACCACCTAGAGATAGGTTTTCCCTTCSGGACAAGARACAGGT<br/> GGKGCAGCTGYSTCAKCTCGTYCSTGARATGTTTGGGTAAKTCCCGCATCGAGCGCACCCCTTGTTATMGT</p>                                                                                                                                                                                                                                                                                                                                                                                                                                                                                                                                                                                                                                                                                                                                                                                                                                                                                                                                                                                                                                                                                                                                                                                                                                                                                                                                                                                                                         |
|                                            | <p>TMPC<br/>9023A</p> | <p>TGGCAGGTGGCGGGTGTCTATACATGCAGTCGAGCGAGCTTGCCATTGAAATTCTTCGGAATGGACATAGATAACAAGC<br/> TAGCGGCGGATGGGTGAGTAACGCGTGGGTAACCTGCCCTTAAGTCTGGGATACCATTTGAAACAGATGCTAATACC<br/> GGATAAAAGCTACTTTCGCATGAAAGAAGTTTAAAAGGCGGGCGTAAGCTGTCGCTAAAGGATGGACCTGCGATGCAT<br/> TAGCTAGTTGGTAAGGTAACGGCTTACCAAGGCGATGATGCATAGCCGAGTTGAGAGACTGATCGGCCACATTGGGA<br/> CTGAGACACGGCCAAACTCCTACGGGAGGCAGCAGTAGGGAATCTTCCACAATGGACGCAAGTCTGATGGAGCAAC<br/> GCCGCGTGAGTGAAGAAGGTTTTTCGGATCGTAAAGCTCTGTTGTTGGTGAAGAAGGATAGAGGTAGTAACTGGCCTTT<br/> ATTTGACGGTAATCAACCAGAAAGTCACGGCTAACTACGTGCCAGCAGCCGCGTAATACGTAGGTGGCAAGCGTTG<br/> TCCGGATTTATTGGGCGTAAAGCGAGCGCAGGCGGATTGATAAGTCTGATGTGAAAGCCTTCGGCTCAACCGAAGAA<br/> CTGCATCAGAAACTGTCAATCTTGAGTGCAGAAGAGGAGAGTGGAATCCATGTGTAGCGGTGGAATGCGTAGATAT<br/> ATGGAAGAACACCAGTGGCGAAGGCGGCTCTCTGGTCTGTAAGTCTGAGGCTCGAAAGCATGGGTAGCGAACA<br/> GGATTAGATACCCTGGTAGTCCATGCCGTAACGATGAGTGCTAAGTGTGGGAGGTTTTCCGCCTCTCAGTGCTGCAG<br/> CTAACGCATTAAGCACTCCGCCTGGGGAGTACGACCGCAAGGTTGAAACTCAAAGGAATTGACGGGGGCCCGCACAA<br/> GCGGTGGAGCATGTGGTTTAATTCGAAGCAACGCGAAGAACCTTACCAGGTCTTGACATCCTTTGACCACCTAAGAGA<br/> TTAGTTTTTCCCTTCGGGGACAAAGAGACAGGTGGTGCATGGCTGTCGTCAGCTCGTGTGAGATGTTGGGTAAAG<br/> TCCCGCAACGAGCGCAACCCTTGTTAATAGTTGCCAGCATTAAAGTTGGGCACTCTATTGAGACTGCCGGTGACAAACC<br/> GGAGGAAGGTGGGGATGACGTCAAGTCATCATGCCCTTATGACCTGGGCTACACACGTGCTACAATGGGCAGTACA<br/> ACGAGAAGCGAACCTGTGAAGGCAAGCGGATCTCTTAAAGCTGTTCTCAGTTCGGACTGTAGGCTGCAACTCGCTAC<br/> ACGAAGCTGGAATCGCTAGTAATCGCGGATCAGCACGCCGCGGTGAATACGTTCCCGGGCCTTGACACACCGCCCGT<br/> CACACCATGAGAGTTTGTAAACACCCAAAGTCGGTGAGGTAACCTTTGGAGCCAGCCGCCTAAGGTGGGACAGATGAT<br/> TAGGGTGAAGTCGTAACAAGAGCAGGCCCC</p> |
| <p><i>Lactobacillus<br/>helveticus</i></p> | <p>Al-Salhi-190</p>   | <p>GGGTGAGTAACACGTGGGGAACCTGCCCATAGTCTGGGATACCACTTGAAACAGGTGCTAATACCGGATAAGAAA<br/> GCAGATCGCATGATCAGCTTATAAAAGGCGGGCGTAAGCTGTCGCTATGGGATGGCCCCGCGGTGCATTAGCTAGTTGG<br/> TAAGGTAACGGCTTACCAAGGCAATGATGCATAGCCGAGTTGAGAGACTGATCGGCCACATTGGGACTGAGACACGG<br/> CCCAAACCTCCTACGGGAGGCAGCAGTAGGGAATCTTCCACAATGGACGCAAGTCTGATGGAGCAACGCCGCGTGAGT<br/> GAAGAAGTTTTTCGGATCGTAAAGCTCTGTTGTTGGTGAAGAAGGATAGAGGTAGTAACTGGCCTTTATTTGACGGTG<br/> ATCAACCAGAAAGTCACGGCTAACTACGTGCCAGCAGCCGCGTAATACGTAGGTGGCAAGCGTTGTCCGGATTTATT<br/> GGGCGTAAAGCGAGCGCAGGCGGAAGAATAAGTCTGATGTGAAAGCCCTCGGCTTAACCGAGGAACTGCATCGGAAA<br/> CTGTTTTTCTTGAGTGCAGAAGAGGAGAGTGGAATCCATGTGTAGCGGTGGAATGCGTAGATATATGGAAGAACACC<br/> AGTGCGAAGGCGACTCTCTGGTCTGCAACTGACGCTGAGGCTCGAAAGCATGGGTAGCGAACAGGATTAGATACCC<br/> TGGTAGTCCATGCCGTAACGATGAGTGCTAAGTGTGGGAGGTTTTCCGCCTCTCAGTGCTGCAGCTAACGCATTAAG<br/> CACTCCGCCTGGGGAGTACGACCGCAAGGTTGAAACTCAAAGGAATTGACGGGGGCCCGCACAAAGCGGTGGAGCATG</p>                                                                                                                                                                                                                                                                                                                                                                                                                                                                                                                                                                                                                                                                                                                          |



|           |                                                                                                                                                                                                                                                                                                                                                                                                                                                                                                                                                                                                                                                                                                                                                                                                                                                                                                                                                                                                                                                                                                                                                                                                                                                                                                                                                                                                                                                                                                                                                                                                                                                                                            |
|-----------|--------------------------------------------------------------------------------------------------------------------------------------------------------------------------------------------------------------------------------------------------------------------------------------------------------------------------------------------------------------------------------------------------------------------------------------------------------------------------------------------------------------------------------------------------------------------------------------------------------------------------------------------------------------------------------------------------------------------------------------------------------------------------------------------------------------------------------------------------------------------------------------------------------------------------------------------------------------------------------------------------------------------------------------------------------------------------------------------------------------------------------------------------------------------------------------------------------------------------------------------------------------------------------------------------------------------------------------------------------------------------------------------------------------------------------------------------------------------------------------------------------------------------------------------------------------------------------------------------------------------------------------------------------------------------------------------|
|           | TGGTTTAATTCGAAGCAACGCGAAGAACCTTACCAGGTCTTGACATC                                                                                                                                                                                                                                                                                                                                                                                                                                                                                                                                                                                                                                                                                                                                                                                                                                                                                                                                                                                                                                                                                                                                                                                                                                                                                                                                                                                                                                                                                                                                                                                                                                            |
| DSM 20075 | AAAGTTTGATTCTGGCTCAGGACGAACGCTGGCGGCGTGCCTAATACATGCAAGTCGAGCGAGCAGAACCAGCAGAT<br>TTACTTCGGTAATGACGCTGGGGACGCGAGCGGCGGATGGGTGAGTAACACGTGGGGAACCTGCCCCATAGTCTGGG<br>ATACCACTTGAAACAGGTGCTAATACCGGATAAGAAAGCAGATCGCATGATCAGCTTATAAAAGGCGGCGTAAGCT<br>GTCGCTATGGGATGGCCCCGCGGTGCATTAGCTAGTTGGTAAGGTAACGGCTTACCAAGGCAATGATGCATAGCCGAG<br>TTGAGAGACTGATCGGCCACATTGGGACTGAGACACGGCCAAACTCTACGGGAGGCAGCAGTAGGGAATCTTCCA<br>CAATGGACGCAAGTCTGATGGAGCAACGCCGCGTGAGTGAAGAAGGTTTTCCGGATCGTAAAGCTCTGTTGTTGGTGAA<br>GAAGGATAGAGGTAGTAAGTGGCCTTTATTTGACGGTAATCAACCAGAAAGTCACGGCTAACTACGTGCCAGCAGCC<br>GCGGTAATACGTAGGTGGCAAGCGTTGTCCGGATTTATTGGGCGTAAAGCGAGCGCAGGCGGAAGAATAAGTCTGAT<br>GTGAAAGCCCTCGGCTTAACCGAGGAACTGCATCGGAAACTGTTTTTCTTGAGTGCAGAAGAGGAGAGTGGAATTCCA<br>TGTGTAGCGGTGGAATGCGTAGATATATGGAAGAACACCAGTGCCGAAGGCGACTCTCTGGTCTGCAACTGACGCTG<br>AGGCTCGAAAGCATGGGTAGCGAACAGGATTAGATACCCTGGTAGTCCATGCCGTAACGATGAGTGCTAAGTGTG<br>GGAGGTTTTCCGCTCTCAGTGCTGCAGCTAACGCATTAAGCACTCCGCCTGGGGAGTACGACCGCAAGGTTGAAACTC<br>AAAGGAATTGACGGGGGCCCGCACAAAGCGGTGGAGCATGTGGTTAATTCGAAGCAACGCGAAGAACCTTACCAGGT<br>CTTGACATCTAGTGCCATCCTAAGAGATTAGGAGTTCCTTCCGGGACGCTAAGACAGGTGGTGCATGGCTGTCGTC<br>GCTCGTGTGAGATGTTGGGTTAAGTCCCGCAACGAGCGCAACCCTTGTTATTAGTTGCCAGCATTAAAGTTGGGCA<br>CTCTAATGAGACTGCCGGTGATAAACCAGGAGGAAGGTGGGGATGACGTCAAGTCATCATGCCCTTATGACCTGGGCT<br>ACACACGTGCTACAATGGACAGTACAACGAGAAGCGAGCCTGCGAAGGCAAGCGAATCTCTGAAAGCTGTTCTCAGT<br>TCGGACTGCAGTCTGCAACTCGACTGCACGAAGCTGGAATCGCTAGTAATCGCGGATCAGAACGCCGCGGTGAATAC<br>GTTCCCGGGCCTTGTACACACCGCCCGTCACACCATGGAAGTCTGCAATGCCCAAAGCCGGTGGCCTAACCTTCGGGA<br>AGGAGCCGTCTAAGGCAGGGCAGATGACTGGGGTGAAGTCGTAACAAGGTAGCCGTAGAGAACCTGCGGCTGGATCA<br>CCTCCT |
| KHI1      | GCAGTCGAGCGAGCAGAACCAGCAGATTTACTTCGGTAATGACGCTGGGGACGCGAGCGGCGGATGGGTGAGTAACA<br>CGTGGGGAACCTGCCCCATAGTCTAGGATACCACTTGAAACAGGTGCTAATACCGGATAATAAAGCAGATCGCATG<br>ATCAGCTTATAAAAGGCGGCGTAAGCTGTCGCTATGGGATGGCCCCGCGGTGCATTAGCTAGTTGGTAAGGTAACGGC<br>TTACCAAGGCAATGATGCATAGCCGAGTTGAGAGACTGAACGGCCACATTGGGACTGAGACACGGCCAAACTCCTA<br>CGGGAGGCAGCAGTAGGGAATCTTCCACAATGGACGCAAGTCTGATGGAGCAACGCCGCGTGAGTGAAGAAGGTTTT<br>CGGATCGTAAAGCTCTGTTGTTGGTGAAGAAGGATAGAGGTAGTAAGTGGCCTTTATTTGACGGTAATCAACCAGAAA<br>GTCACGGCTAACTACGTGCCAGCAGCCGCGGTAATACGTAGGTGGCAAGCGTTGTCCGGATTTATTGGGCGTAAAGCG<br>AGCGCAGGCGGAAGAATAAGTCTGATGTGAAAGCCCTCGGCTTAACCGAGGAATTGCATCGGAAACTGTTTTTCTTGA<br>GTGCAGAAGAGGAGAGTGGAAGTCCATGTGTAGCGGTGGAATGCGTAGATATATGGAAGAACACCAGTGCCGAAGG<br>CGGCTCTCTGGTCTGCAACTGACGCTGAGGCTCGAAAGCATGGGTAGCGAACAGGATTAGATACCCTGGTAGTCCATG<br>CCGTAACGATGAGTGCTAAGTGTGGGAGGTTTTCCGCCTCTCAGTGCTGCAGCTAACGCATTAAGCACTCCGCCTGG<br>GGAGTACGACCGCAAGGTTGAAACTCAAAGGAATTGACGGGGGCCCGCACAAAGCGGTGGAGCATGTGGTTAATTCG                                                                                                                                                                                                                                                                                                                                                                                                                                                                                                                                                                                                                                                                                 |

|  |            |                                                                                                                                                                                                                                                                                                                                                                                                                                                                                                                                                                                                                                                                                                                                                                                                                                                                                                                                                                                                                                                                                                                                                                                                                                                                                                                                                                                                                                                                                                                                                                                                                                                     |
|--|------------|-----------------------------------------------------------------------------------------------------------------------------------------------------------------------------------------------------------------------------------------------------------------------------------------------------------------------------------------------------------------------------------------------------------------------------------------------------------------------------------------------------------------------------------------------------------------------------------------------------------------------------------------------------------------------------------------------------------------------------------------------------------------------------------------------------------------------------------------------------------------------------------------------------------------------------------------------------------------------------------------------------------------------------------------------------------------------------------------------------------------------------------------------------------------------------------------------------------------------------------------------------------------------------------------------------------------------------------------------------------------------------------------------------------------------------------------------------------------------------------------------------------------------------------------------------------------------------------------------------------------------------------------------------|
|  |            | <p>AAGCAACGCGAAGAACCTTACCAGGTCTTGACATCTAGTGCCATCCTAAGAGATTAGGAGTTCCCTTCGGGGACGCTA<br/> AGACAGGTGGTGCATGGCTGTCGTCAGCTCGTGTGAGATGTTGGGTTAAGTCCCAGCAACGAGCGCAACCCTTATT<br/> ATTAGTTGCCAGCATTAAGTTGGGCACTCTAATGAGACTGCCGGTGACAAACCGGAGGAAGGTGGGGATGACGTCAA<br/> GTCATCATGCCCCTTATGACCTGGGCTACACACGTGCTACAATGGGCAGTACAACGAGAAGCGAGCCTGCGAAGGCA<br/> AGCGAATCTCTGAAAGCTGTTCTCAGTTCGGACTGCAGTCTGCAACTCGACTGCACGAAGCTGGAATCGCTAGTAATC<br/> GCGGATCAGAACGCCGCGGTGAATACGTTCCCGGGCCTTGTACACACCGCCCGTCACACCATGGAAGTCTGCAATGCC<br/> CAAAGCCGGTGGCCTAACCTTCGGGAAGGAGCCGTCTAAGGCAGGGCAGATGACTGGGGTGAAGTCGTAACA</p>                                                                                                                                                                                                                                                                                                                                                                                                                                                                                                                                                                                                                                                                                                                                                                                                                                                                                                                                                                                                                                                 |
|  | MJM60419-1 | <p>GGCAATGGCGGGGTGCTATACATGCAAGTCGAGCGAGCAGAACCAGCAGATTTACTTCGGTAATGACGCTGGGGACG<br/> CGAGCGGCGGATGGGTGAGTAACACGTGGGGAACCTGCCCATAGTCTAGGATACCACTTGAAACAGGTGCTAATA<br/> CCGGATAATAAAGCAGATCGCATGATCAGCTTATAAAAGGCGGCGTAAGCTGTGCTATGGGATGGCCCCGCGGTGC<br/> ATTAGCTAGTTGGTAAGGTAACGGCTTACCAAGGCAATGATGCATAGCCGAGTTGAGAGACTGAACGGCCACATTGG<br/> GACTGAGACACGGCCCAAACCTCTACGGGAGGCAGCAGTAGGGAATCTTCCACAATGGACGCAAGTCTGATGGAGCA<br/> ACGCCGCGTGAGTGAAGAAGGTTTTTCGGATCGTAAAGCTCTGTTGTTGGTGAAGAAGGATAGAGGTAGTAACTGGCCT<br/> TTATTTGACGGTAATCAACCAGAAAGTCACGGCTAACTACGTGCCAGCAGCCGCGGTAATACGTAGGTGGCAAGCGTT<br/> GTCCGATTTATTGGGCGTAAAGCGAGCGCAGGCGGAAGAATAAGTCTGATGTGAAAGCCCTCGGCTTAACCGAGGA<br/> ATTGCATCGGAAACTGTTTTTCTTGAGTGCAGAAGAGGAGAGTGGAACTCCATGTGTAGCGGTGGAATGCGTAGATAT<br/> ATGGAAGAACACCAGTGGCGAAGGCGGCTCTCTGGTCTGCAACTGACGCTGAGGCTCGAAAGCATGGGTAGCGAACA<br/> GGATTAGATAACCCTGGTAGTCCATGCCGTAACGATGAGTGCTAAGTGTGGGAGGTTTCCGCCTCTCAGTGCTGCAG<br/> CTAACGCATTAAGCACTCCGCCTGGGAGTACGACCAGCAAGGTTGAAACTCAAAGGAATTGACGGGGGCCCGCACAA<br/> GCGGTGGAGCATGTGGTTAATTCGAAGCAACGCGAAGAACCTTACCAGGTCTTGACATCTAGTGCCATCCTAAGAGA<br/> TTAGGAGTTCCCTTCGGGGACGCTAAGACAGGTGGTGCATGGCTGTCGTCAGCTCGTGTGAGATGTTGGGTTAAG<br/> TCCCGCAACGAGCGCAACCCTTATTATTAGTTGCCAGCATTAAAGTTGGGCACCTCTAATGAGACTGCCGGTGACAAAC<br/> CGGAGGAAGGTGGGGATGACGTCAAGTCATCATGCCCTTATGACCTGGGCTACACACGTGCTACAATGGGCAGTAC<br/> AACGAGAAGCGAGCCTGCGAAGGCAAGCGAATCTCTGAAAGCTGTTCTCAGTTCGGACTGCAGTCTGCAACTCGACT<br/> GCACGAAGCTGGAATCGCTAGTAATCGCGGATCAGAACGCCGCGGTGAATACGTTCCCGGGCCTTGTACACACCGCCC<br/> GTCACACCATGGAAGTCTGCAATGCCCAAAGCCGGTGGCCTAACCTTCGGGAAGGAGCCGTCTAAGCAGTCAGATGC<br/> CTG</p> |
|  | MJM60419-3 | <p>GGCAATGGCGGGGTGCTATACATGCAAGTCGAGCGAGCAGAACCAGCAGATTTACTTCGGTAATGACGCTGGGGACG<br/> CGAGCGGCGGATGGGTGAGTAACACGTGGGGAACCTGCCCATAGTCTAGGATACCACTTGAAACAGGTGCTAATA<br/> CCGGATAATAAAGCAGATCGCATGATCAGCTTATAAAAGGCGGCGTAAGCTGTGCTATGGGATGGCCCCGCGGTGC<br/> ATTAGCTAGTTGGTAAGGTAACGGCTTACCAAGGCAATGATGCATAGCCGAGTTGAGAGACTGAACGGCCACATTGG<br/> GACTGAGACACGGCCCAAACCTCTACGGGAGGCAGCAGTAGGGAATCTTCCACAATGGACGCAAGTCTGATGGAGCA<br/> ACGCCGCGTGAGTGAAGAAGGTTTTTCGGATCGTAAAGCTCTGTTGTTGGTGAAGAAGGATAGAGGTAGTAACTGGCCT<br/> TTATTTGACGGTAATCAACCAGAAAGTCACGGCTAACTACGTGCCAGCAGCCGCGGTAATACGTAGGTGGCAAGCGTT</p>                                                                                                                                                                                                                                                                                                                                                                                                                                                                                                                                                                                                                                                                                                                                                                                                                                                                                                                                                                                                                                              |

|                                           |                   |                                                                                                                                                                                                                                                                                                                                                                                                                                                                                                                                                                                                                                                                                                                                                                                                                                                                                                                                                                                                                                                                                                                                                                                                                                                                                                                                                                                                                                                                                                                                                                                                                                                            |
|-------------------------------------------|-------------------|------------------------------------------------------------------------------------------------------------------------------------------------------------------------------------------------------------------------------------------------------------------------------------------------------------------------------------------------------------------------------------------------------------------------------------------------------------------------------------------------------------------------------------------------------------------------------------------------------------------------------------------------------------------------------------------------------------------------------------------------------------------------------------------------------------------------------------------------------------------------------------------------------------------------------------------------------------------------------------------------------------------------------------------------------------------------------------------------------------------------------------------------------------------------------------------------------------------------------------------------------------------------------------------------------------------------------------------------------------------------------------------------------------------------------------------------------------------------------------------------------------------------------------------------------------------------------------------------------------------------------------------------------------|
|                                           |                   | <p>GTCCGGATTTATTGGGCGTAAAGCGAGCGCAGGCGGAAGAATAAGTCTGATGTGAAAGCCCTCGGCTTAACCGAGGA<br/> ATTGCATCGGAAACTGTTTTCTTGAGTGCAGAAGAGGAGAGTGGAACTCCATGTGTAGCGGTGGAATGCGTAGATAT<br/> ATGGAAGAACACCAGTGGCGAAGGCGGCTCTCTGGTCTGCAACTGACGCTGAGGCTCGAAAGCATGGGTAGCGAACA<br/> GGATTAGATACCCTGGTAGTCCATGCCGTAACGATGAGTGCTAAGTGTGGGAGGTTCCGCCTCTCAGTGCTGCAG<br/> CTAACGCATTAAGCACTCCGCCTGGGGAGTACGACCGCAAGGTTGAAACTCAAAGGAATTGACGGGGGCCGCACAA<br/> GCGGTGGAGCATGTGGTTAATTCGAAGCAACGCGAAGAACCTTACCAGGTCTTGACATCTAGTGCCATCCTAAGAGA<br/> TTAGGAGTTCCCTTCGGGGACGCTAAGACAGGTGGTGCATGGCTGTCGTCAGCTCGTGTGCTGAGATGTTGGGTAAAG<br/> TCCCGCAACGAGCGCAACCCTTATTATTAGTTGCCAGCATTAAAGTTGGGCACCTCTAATGAGACTGCCGGTGACAAAC<br/> CGGAGGAAGGTGGGGATGACGTCAAGTCATCATGCCCTTATGACCTGGGCTACACACGTGCTACAATGGGCAGTAC<br/> AACGAGAAGCGAGCCTGCGAAGGCAAGCGAATCTCTGAAAGCTGTTCTCAGTTCGGACTGCAGTCTGCAACTCGACT<br/> GCACGAAGCTGGAATCGCTAGTAATCGCGGATCAGAACGCCGCGGTGAATACGTTCCCGGGCCTTGTACACACCGCCC<br/> GTCACACCATGGAAGTCTGCAATGCCAAAGCCGGTGGCCTAACCTTCGGGAAGGAGCCGTCTAAGCAGTCAGATGC<br/> CTG</p>                                                                                                                                                                                                                                                                                                                                                                                                                                                                                                                                                                                                              |
| <p><i>Lactobacillus<br/>johnsonii</i></p> | <p>ATCC 33200</p> | <p>GGCGGCGTGCCTAATACATGCAAGTCGAGCGAGCTTGCCTAGATGATTTTAGTGCTTGCCTAAATGAAACTAGATAC<br/> AAGCGAGCGGCGGACGGGTGAGTAACACGTGGGTAACCTGCCAAGAGACTGGGATAACACCTGGAACAGATGCT<br/> AATACCGGATAACAACACTAGACGCATGTCTAGAGTTTGAAGATGGTTCTGCTATCACTCTTGGATGGACCTGCGGT<br/> GCATTAGCTAGTTGGTAAGGTAATGGCTTACCAAGGCGATGATGCATAGCCGAGTTGAGAGACTGATCGGCCACATTG<br/> GGACTGAGACACGGCCAAACTCCTACGGGAGGCAGCAGTAGGGAATCTCCACAATGGACGAAAGTCTGATGGAGC<br/> AACGCCGCGTGAGTGAAGAAGGTTTCGGCTCGTAAAGCTCTGTTGGTAGTGAAGAAAGATAGAGGTAGTAACTGGC<br/> CTTTATTTGACGGTAATTAAGTAAAGTACAGGCTAACTACGTGCCAGCAGCCGCGGTAATACGTAGGTGGCAAGCG<br/> TTGTCCGGATTTATTGGGCGTAAAGCGAGTGCAGGCGGTTCAATAAGTCTGATGTGAAACGCTTCGGCTCAACCGGAG<br/> AATTGCATCAGAACTGTTGAACTTGAGTGCAGAAGAGGAGAGTGGAACTCCATGTGTAGCGGTGGAATGCGTAGAT<br/> ATATGGAAGAACACCAGTGGCGAAGGCGGCTCTCTGGTCTGCAACTGACGCTGAGGCTCGAAAGCATGGGTAGCGAA<br/> CAGGATTAGATACCCTGGTAGTCCATGCCGTAACGATGAGTGCTAAGTGTGGGAGGTTCCGCCTCTCAGTGCTGC<br/> AGCTAACGCATTAAGCACTCCGCCTGGGGAGTACGACCGCAAGGTTGAAACTCAAAGGAATTGACGGGGGCCGCAC<br/> AAGCGGTGGAGCATGTGGTTAATTCGAAGCAACGCGAAGAACCTTACCAGGTCTTGACATCCAGTGCAAACCTAAG<br/> AGATTAGGTGTTCCCTTCGGGGACGCTGAGACAGGTGGTGCATGGCTGTCGTCAGCTCGTGTGATGAGATGTTGGGTT<br/> AAGTCCCGCAACGAGCGCAACCCTTGTCAATTAGTTGCCATCATTAAAGTTGGGCACTCTAATGAGACTGCCGGTGACAA<br/> ACCGGAGGAAGGTGGGGATGACGTCAAGTCATCATGCCCTTATGACCTGGGCTACACACGTGCTACAATGGACGGT<br/> ACAACGAGAAGCGAACCTGCGAAGGCAAGCGGATCTCTTAAAGCCGTTCTCAGTTCGGACTGTAGGCTGCAACTCGC<br/> CTACACGAAGCTGGAATCGCTAGTAATCGCGGATCAGCACGCCGCGGTGAATACGTTCCCGGGCCTTGTACACACCGC<br/> CCGTCACACCATGAGAGTCTGTAACACCCAAAGCCGGTGGGATAACCTTTATAGGAGTCAGCCGTCTAAGGTAGGAC<br/> AGATGATTAGGGTGAA</p> |
|                                           | <p>LJ_c1-2</p>    | <p>TACATGCAAGTCGAGCGAGCTTGCCTAGATGATTTTAGTGCTTGCCTAAATGAAACTAGATACAAGCGAGCGGCGGA</p>                                                                                                                                                                                                                                                                                                                                                                                                                                                                                                                                                                                                                                                                                                                                                                                                                                                                                                                                                                                                                                                                                                                                                                                                                                                                                                                                                                                                                                                                                                                                                                       |

|         |  |                                                                                                                                                                                                                                                                                                                                                                                                                                                                                                                                                                                                                                                                                                                                                                                                                                                                                                                                                                                                                                                                                                                                                                                                                                                                                                                                                                                                                                                                                                                      |
|---------|--|----------------------------------------------------------------------------------------------------------------------------------------------------------------------------------------------------------------------------------------------------------------------------------------------------------------------------------------------------------------------------------------------------------------------------------------------------------------------------------------------------------------------------------------------------------------------------------------------------------------------------------------------------------------------------------------------------------------------------------------------------------------------------------------------------------------------------------------------------------------------------------------------------------------------------------------------------------------------------------------------------------------------------------------------------------------------------------------------------------------------------------------------------------------------------------------------------------------------------------------------------------------------------------------------------------------------------------------------------------------------------------------------------------------------------------------------------------------------------------------------------------------------|
|         |  | <p>CGGGTGAGTAACACGTGGGTAACCTGCCAAGAGACTGGGATAACACCTGGAAACAGATGCTAATACCGGATAACAA<br/> CACTAGACGCATGTCTAGAGTTTGAAAGATGGTTCTGCTATCACTCTTGGATGGACCTGCGGTGCATTAGCTAGTTGGT<br/> AAGGTAACGGCTTACCAAGGCAATGATGCATAGCCGAGTTGAGAGACTGATCGGCCACATTGGGACTGAGACACGGC<br/> CCAAACTCCTACGGGAGGCAGCAGTAGGGAATCTTCCACAATGGACGAAAGTCTGATGGAGCAACGCCGCGTGAGTG<br/> AAGAAGGGTTTCGGCTCGTAAAGCTCTGTTGGTAGTGAAGAAAGATAGAGGTAGTAACTGGCCTTTATTTGACGGTAA<br/> TACTTAGAAAAGTACCGGCTAACTACGTGCCAGCAGCCGCGGTAATACGTAGGTGGCAAGCGTTGTCCGGATTTATTG<br/> GGCGTAAAGCGAGTGCAGGCGGTTCAATAAGTCTGATGTGAAAAGCCTTCGGCTCAACCGGAGAATTGCATCAGAAAC<br/> TGTTGAACTTGAGTGCAGAAGAGGAGAGTGGAACTCCATGTGTAGCGGTGGAATGCGTAGATATATGGAAGAACC<br/> AGTGCGAAGGCGGCTCTCTGGTCTGTAAGTACGCTGAGGCTCGAAAGCATGGGTAGCGAACAGGATTAGATACCC<br/> TGGTAGTCCATGCCGTAACGATGAGTGCTAAGTGTGGGAGGTTCCGCCTCTCAGTGCTGCAGCTAACGCATTAAG<br/> CACTCCGCCTGGGGAGTACGACCGCAAGGTTGAACTCAAAGGAATTGACGGGGGCCCGCACAAAGCGGTGGAGCATG<br/> TGGTTAATTCGAAGCAACGCGAAGAACCCTACCAGGTCTTGACATCCAGTGCAAACCTAAGAGATTAGGTGTTCCCT<br/> TCGGGGACGCTGAGACAGGTGGTGCATGGCTGTCGTCAGCTCGTGTCGTGAGATGTTGGGTTAAGTCCCGCAACGAGC<br/> GCAACCCTTGTCATTAGTTGCCATCATTAAGTTGGGCACTCTAATGAGACTGCCGGTGACAAACCGGAGGAAGGTGGG<br/> GATGACGTCAAGTCATCATGCCCTTATGACCTGGGCTACACACGTGCTACAATGGACGGTACAACGAGAAGCAAAC<br/> CTGCGAAGGCAAGCGGATCTCTTAAAGCCGTTCTCAGTTCGGACTGTAGGCTGCAACTCGCTACACGAAGCTGGAAT<br/> CGTAGTAATCGCGGATCAGCACGCCGCGGTGAATACGTTCCCGGGCCTTGTACACACCGCCCGTACACCATGAGAG<br/> TCTGTAACACCCAAAGCCGGTGGGATAACCTTTATAGGAGTCAG</p> |
| LJ_c3-4 |  | <p>GCGGCGTGCCTAATACATGCAAGTCGAGCGAGCTTGCCCTAGATGATTTTGTGCTTGCCTAAATGAACTAGATACA<br/> AGCGAGCGGCGGACGGGTGAGTAACACGTGGGTAACCTGCCAAGAGACTGGGATAACACCTGGAAACAGATGCTA<br/> ATACCGGATAACAACACTAGACGCATGTCTAGAGTTTGAAAGATGGTTCTGCTATCACTCTTGGATGGACCTGCGGTG<br/> CATTAGCTAGTTGGTAAGGTAACGGCTTACCAAGGCAATGATGCATAGCCGAGTTGAGAGACTGATCGGCCACATTGG<br/> GACTGAGACACGGCCCAAACCTCCTACGGGAGGCAGCAGTAGGGAATCTTCCACAATGGACGAAAGTCTGATGGAGCA<br/> ACGCCGCGTGAGTGAAGAAGGGTTTCGGCTCGTAAAGCTCTGTTGGTAGTGAAGAAAGATAGAGGTAGTAACTGGCC<br/> TTTATTTGACGGTAATTACTTAGAAAAGTACCGGCTAACTACGTGCCAGCAGCCGCGGTAATACGTAGGTGGCAAGCGT<br/> TGTCCGGATTTATTGGGCGTAAAGCGAGTGCAGGCGGTTCAATAAGTCTGATGTGAAAAGCCTTCGGCTCAACCGGAGA<br/> ATTGCATCAGAACTGTTGAACTTGAGTGCAGAAGAGGAGAGTGGAACTCCATGTGTAGCGGTGGAATGCGTAGATA<br/> TATGGAAGAACACCAGTGGCGAAGGCGGCTCTCTGGTCTGTAAGTACGCTGAGGCTCGAAAGCATGGGTAGCGAAC<br/> AGGATTAGATACCCTGGTAGTCCATGCCGTAACGATGAGTGCTAAGTGTGGGAGGTTTCCGCCTCTCAGTGCTGCA<br/> GCTAACGCATTAAGCACTCCGCCTGGGGAGTACGACCGCAAGGTTGAACTCAAAGGAATTGACGGGGGCCCGCACAA<br/> AGCGGTGGAGCATGTGGTTTAATTCGAAGCAACGCGAAGAACCCTACCAGGTCTTGACATCCAGTGCAAACCTAAGA<br/> GATTAGGTGTTCCCTTCGGGGACGCTGAGACAGGTGGTGCATGGCTGTCGTCAGCTCGTGTCGTGAGATGTTGGGTTA<br/> AGTCCCGCAACGAGCGCAACCCTTGTCATTAGTTGCCATCATTAAGTTGGGCACTCTAATGAGACTGCCGGTGACAAA<br/> CCGGAGGAAGGTGGGGATGACGTCAAGTCATCATGCCCTTATGACCTGGGCTACACACGTGCTACAATGGACGGTA</p>                                                                                                                                  |

|  |          |                                                                                                                                                                                                                                                                                                                                                                                                                                                                                                                                                                                                                                                                                                                                                                                                                                                                                                                                                                                                                                                                                                                                                                                                                                                                                                                                                                                                                                                                                                                                                                                      |
|--|----------|--------------------------------------------------------------------------------------------------------------------------------------------------------------------------------------------------------------------------------------------------------------------------------------------------------------------------------------------------------------------------------------------------------------------------------------------------------------------------------------------------------------------------------------------------------------------------------------------------------------------------------------------------------------------------------------------------------------------------------------------------------------------------------------------------------------------------------------------------------------------------------------------------------------------------------------------------------------------------------------------------------------------------------------------------------------------------------------------------------------------------------------------------------------------------------------------------------------------------------------------------------------------------------------------------------------------------------------------------------------------------------------------------------------------------------------------------------------------------------------------------------------------------------------------------------------------------------------|
|  |          | <p>CAACGAGAAGCGAACCTGCGAAGGCAAGCGGATCTCTTAAAGCCGTTCTCAGTTCGGACTGTAGGCTGCAACTCGCCT<br/> ACACGAAGCTGGAATCGCTAGTAATCGCGGATCAGCACGCCGCGGTGAATACGTTCCCAGGCGCTTGTACACACCGCCC<br/> GTCACACCATGAGAGTCTGTAACACCCAAAGCCGGTGGGATAACCTTTATAGGAGTCAGCCC</p>                                                                                                                                                                                                                                                                                                                                                                                                                                                                                                                                                                                                                                                                                                                                                                                                                                                                                                                                                                                                                                                                                                                                                                                                                                                                                                                                       |
|  | LJ_c3-6  | <p>TCGAGCGAGCTTGCCCTAGATGATTTTAGTGCTTGCACTAAATGAAACTAGATACAAGCGAGCGGCGGACGGGTGAGT<br/> AACACGTGGGTAACCTGCCCAAGAGACTGGGATAACACCTGGAAACAGATGCTAATACCGGATAACAACACTAGACG<br/> CATGTCTAGAGTTTGAAAGATGGTTCTGCTATCACTCTTGATGGACCTGCGGTGCATTAGCTAGTTGGTAAGGTAAC<br/> GGCTTACCAAGGCAATGATGCATAGCCGAGTTGAGAGACTGATCGGCCACATTGGGACTGAGACACGGCCCAAACCTC<br/> CTACGGGAGGCAGCAGTAGGGAATCTTCCACAATGGACGAAAGTCTGATGGAGCAACGCCGCGTGAGTGAAGAAGG<br/> GTTTCGGCTCGTAAAGCTCTGTTGGTAGTGAAGAAAGATAGAGGTAGTAACCTGGCCTTTATTTGACGGTAATTACTTA<br/> GAAAGTCACGGCTAACTACGTGCCAGCAGCCGCGGTAATACGTAGGTGGCAAGCGTTGTCCGGATTTATTGGGCGTAA<br/> AGCGAGTGCAGGCGGTTCAATAAGTCTGATGTGAAAGCCTTCGGCTCAACCGGAGAATTGCATCAGAACTGTTGAA<br/> CTTGAGTGCAGAAGAGGAGAGTGGAACTCCATGTGTAGCGGTGGAATGCGTAGATATATGGAAGAACACCAGTGGCG<br/> AAGGCGGCTCTCTGGTCTGCAACTGACGCTGAGGCTCGAAAGCATGGGTAGCGAACAGGATTAGATACCCTGGTAGT<br/> CCATGCCGTAACGATGAGTGCTAAGTGTGGGAGGTTCCGCCTCTCAGTGCTGCAGCTAACGCATTAAGCACTCCG<br/> CCTGGGGAGTACGACCGCAAGGTTGAAACTCAAAGGAATTGACGGGGGCCCCGCACAAGCGGTGGAGCATGTGGTTTA<br/> ATTCGAAGCAACGCGAAGAACCTTACCAGGTCTTGACATCCAGTGCAAACCTAAGAGATTAGGTGTTCCCTTCGGGGA<br/> CGCTGAGACAGGTGGTGCATGGCTGTCGTCAGCTCGTGTGAGATGTTGGGTTAAGTCCCGCAACGAGCGCAACCC<br/> TTGTCATTAGTTGCCATCATTAAAGTTGGGCACTCTAATGAGACTGCCGGTGACAAACCGGAGGAAGGTGGGGATGACG<br/> TCAAGTCATCATGCCCTTATGACCTGGGCTACACACGTGCTACAATGGACGGTACAACGAGAAGCAAACCTGCGAA<br/> GGCAAGCGGATCTCTTAAAGCCGTTCTCAGTTCGGACTGTAGGCTGCAACTCGCCTACACGAAGCTGGAATCGCTAGT<br/> AATCGCGGATCAGCACGCCGCGGTGAATACGTTCCCAGGCGCTTGTACACACCGCCGTCACACCATGAGAGTCTGTAA<br/> CACCCAAAGCCGGTGGGAT</p> |
|  | LJ_mika1 | <p>AGTCGAGCGAGCTTGCCCTAGATGATTTTGGTGCTTGCACTAAATGAAACTAGATACAAGCGAGCGGCGGACGGGTGA<br/> GTAACACGTGGGTAACCTGCCCAAGAGACTGGGATAACACCTGGAAACAGATGCTAATACCGGATAACAACACTAGA<br/> CGCATGTCTAGAGTTTGAAAGATGGTTCTGCTATCACTCTTGATGGACCTGCGGTGCATTAGCTAGTTGGTAAGGTA<br/> ACGGCTTACCAAGGCAATGATGCATAGCCGAGTTGAGAGACTGATCGGCCACATTGGGACTGAGACACGGCCCAAAC<br/> TCCTACGGGAGGCAGCAGTAGGGAATCTTCCACAATGGACGAAAGTCTGATGGAGCAACGCCGCGTGAGTGAAGAAG<br/> GGTTTCGGCTCGTAAAGCTCTGTTGGTAGTGAAGAAAGATAGAGGTAGTAACCTGGCCTTTATTTGACGGTAATTACTT<br/> AGAAAGTCACGGCTAACTACGTGCCAGCAGCCGCGGTAATACGTAGGTGGCAAGCGTTGTCCGGATTTATTGGGCGTA<br/> AAGCGAGTGCAGGCGGTTCAATAAGTCTGATGTGAAAGCCTTCGGCTCAACCGGAGAATTGCATCAGAACTGTTGA<br/> ACTTGAGTGCAGAAGAGGAGAGTGGAACTCCATGTGTAGCGGTGGAATGCGTAGATATATGGAAGAACACCAGTGGC<br/> GAAGGCGGCTCTCTGGTCTGCAACTGACGCTGAGGCTCGAAAGCATGGGTAGCGAACAGGATTAGATACCCTGGTAG<br/> TCCATGCCGTAACGATGAGTGCTAAGTGTGGGAGGTTCCGCCTCTCAGTGCTGCAGCTAACGCATTAAGCACTCC<br/> GCCTGGGGAGTACGACCGCAAGGTTGAAACTCAAAGGAATTGACGGGGGCCCCGCACAAGCGGTGGAGCATGTGGTTT</p>                                                                                                                                                                                                                                                                                                                                                                                                                                                                                                                                              |

|                                                     |            |                                                                                                                                                                                                                                                                                                                                                                                                                                                                                                                                                                                                                                                                                                                                                                                                                                                                                                                                                                                                                                                                                                                                                                                                                                                                                                                                                                                                                                                                                                                                                                                                                                                                                              |
|-----------------------------------------------------|------------|----------------------------------------------------------------------------------------------------------------------------------------------------------------------------------------------------------------------------------------------------------------------------------------------------------------------------------------------------------------------------------------------------------------------------------------------------------------------------------------------------------------------------------------------------------------------------------------------------------------------------------------------------------------------------------------------------------------------------------------------------------------------------------------------------------------------------------------------------------------------------------------------------------------------------------------------------------------------------------------------------------------------------------------------------------------------------------------------------------------------------------------------------------------------------------------------------------------------------------------------------------------------------------------------------------------------------------------------------------------------------------------------------------------------------------------------------------------------------------------------------------------------------------------------------------------------------------------------------------------------------------------------------------------------------------------------|
|                                                     |            | AATTCGAAGCAACGCGAAGAACCTTACCAGGTCTTGACATCCAGTGCAAACCTAAGAGATTAGGTGTTCCCTTCGGGG<br>ACGCTGAGACAGGTGGTGCATGGCTGTCGTCAGCTCGTGTGTCGTGAGATGTTGGGTTAAGTCCCGCAACGAGCGCAACC<br>CTTGTCATTAGTTGCCATCATTAAAGTTGGGCACCTAATGAGACTGCCGGTGACAAACCGGAGGAAGGTGGGGATGAC<br>GTCAAGTCATCATGCCCCTTATGACCTGGGCTACACACGTGCTACAATGGACGGTACAACGAGAAGCGAACCTGCGA<br>AGGCAAGCGGATCTCTTAAAGCCGTTCTCAGTTCGGACTGTAGGCTGCAACTCGCCTACACGAAGCTGGAATCGCTAG<br>TAATCGCGGATCAGCACGCCCGGTTGAATACGTTCCCGGGCCTTGTACACACCGCCCGTACACCATGAGAGTCTGTA<br>ACACCCAAAGCCGGTGGGAT                                                                                                                                                                                                                                                                                                                                                                                                                                                                                                                                                                                                                                                                                                                                                                                                                                                                                                                                                                                                                                                                                                                                                             |
| <i>Lactobacillus<br/>kefirano</i><br><i>faciens</i> | ATCC 43761 | AGAGTTTGATCATGGCTCAGGACGAACGCTGGCGGCGTGCCTAATACATGCAAGTCGAGCGAGCGGAACCAGCAGAA<br>TCACTTCGGTGAGGACGCTGGGAAAGCGAGCGGCGGATGGGTGAGTAACACGTGGGGAACCTGCCCTTAAGTCTGGG<br>ATACCACTTGAAACAGGTGCTAATACCGGATAAGAAAGCAGTTCGCATGAACAGCTTTTAAAAGGCGGCGCAAGCT<br>GTCGCTAAAGGATGGACCCGCGGTGCATTAGCTAGTTGGTAAGGTAACGGCCTACCAAGGCAGTGATGCATAGCCGA<br>GTTGAGAGACTGATCGGCCACATTGGGACTGAGACACGGCCCAAACCTCCTACGGGAGGCAGCAGTAGGGAATCTTCC<br>ACAATGGACGCAAGTCTGATGGAGCAACGCCGCGTGAGTGAAGAAGGTTTTCGGACCGTAAAGCTCTGTTGTTGGTG<br>AAGAAGGATAGAGGTAGTAACTGGCCTTTATTTGACGGTAATCAACCAGAAAGTCACGGCTAACTACGTGCCAGCAG<br>CCGCGGTAATACGTAGGTGGCAAGCGTTGTCCGGATTTATTGGGCGTAAAGCGAGCGCAGGCGGAAGAATAAGTCTG<br>ATGTGAAAGCCCTCGGCTTAACCGAGGAATTGCATCGGAAACTGTTTTTCTTGAGTGCAGAAGAGGAGAGTAGAACTC<br>CATGTGTAGCGGTGGAATGCGTAGATATATGGAAGAATACCAGTGGCGAAGGCGGCTCTCTGGTCTGCAACTGACGCT<br>GAGGCTCGAAAGCATGGGTAGCGAACAGGATTAGATACCCTGGTAGTCCATGCCGTAAACGATGAGTGCTAAGTGTT<br>GGGAGGCTTCCGCCTCTCAGTGCTGCAGCTAACGCATTAAGCACTCCGCCTGGGGAGTACGACCGCAAGGTTGAAACT<br>CAAAGGAATTGACGGGGGCCCCGACAAGCGGTGGAGCATGTGGTTTAATTCGAAGCAACGCGAAGAACCTTACCAGG<br>TCTTGACATCTAGTGCCATTTGTAGAGATACAAAGTTCCCTTCGGGGACGCTAAGACAGGTGGTGCATGGCTGTCGTC<br>AGCTCGTGTGTCGTGAGATGTTGGGTTAAGTCCCGCAACGAGCGCAACCCTTGTATTAGTTGCCAGCATTAAAGTTGGGC<br>ACTCTAATGAGACTGCCGGTGACAAACCGGAGGAAGGTGGGGATGACGTCAAGTCATCATGCCCTTATGACCTGGG<br>CTACACACGTGCTACAATGGGCAGCACAACGAGCAGCGAGCCTGCAAAGGCAAGCAAATCTCTGAAAGCTGTTCTCA<br>GTTTCGGACTGCAGTCTGCAACTCGACTGCACGAAGCTGGAATCGCTAGTAATCGCGGATCAGCACGCCGCGGTGAATA<br>CGTTCGCGGCTTGTACACACCGCCCGTACACCATGGGAGTCTGCAATGCCCAAAGCCGGTGGCCTAACCGCAAGG<br>AAGGAGCCGTCTAAGGCAGGGCAGATGACTGGGGTGAAGTCGTAACAAGGTAGCCGTAGGAGAACCTGCGGTTGGAT<br>CA |
|                                                     | LMG 19149  | GACGAACGCTGGCGGCGTGCCTAATACATGCAAGTCGAGCGAGCGGAACCAGCAGAATCACTTCGGTGAGGACGCTG<br>GGAAAGCGAGCGGCGGATGGGTGAGTAACACGTGGGGAACCTGCCCTTAAGTCTGGGATACCACTTGAAACAGGTG<br>CTAATACCGGATAAGAAAGCAGTTCGCATGAACAGCTTTTAAAAGGCGGCGCAAGCTGTCGCTAAAGGATGGACCCG<br>CGGTGCATTAGCTAGTTGGTAAGGTAACGGCCTACCAAGGCAGTGATGCATAGCCGAGTTGAGAGACTGATCGGCCA<br>CATTGGGACTGAGACACGGCCCAAACCTCCTACGGGAGGCAGCAGTAGGGAATCTCCACAATGGACGCAAGTCTGAT<br>GGAGCAACGCCGCGTGAGTGAAGAAGGTTTTTCGGACCGTAAAGCTCTGTTGTTGGTGAAGAAGGATAGAGGTAGTAA                                                                                                                                                                                                                                                                                                                                                                                                                                                                                                                                                                                                                                                                                                                                                                                                                                                                                                                                                                                                                                                                                                                                                                                           |

|  |                       |                                                                                                                                                                                                                                                                                                                                                                                                                                                                                                                                                                                                                                                                                                                                                                                                                                                                                                                                                                                                                                                                                                                                                                                                                                                                                                                                                                                                                                                                                                  |
|--|-----------------------|--------------------------------------------------------------------------------------------------------------------------------------------------------------------------------------------------------------------------------------------------------------------------------------------------------------------------------------------------------------------------------------------------------------------------------------------------------------------------------------------------------------------------------------------------------------------------------------------------------------------------------------------------------------------------------------------------------------------------------------------------------------------------------------------------------------------------------------------------------------------------------------------------------------------------------------------------------------------------------------------------------------------------------------------------------------------------------------------------------------------------------------------------------------------------------------------------------------------------------------------------------------------------------------------------------------------------------------------------------------------------------------------------------------------------------------------------------------------------------------------------|
|  |                       | <p>CTGGCCTTTATTTGACGGTAATCAACCAGAAAAGTCACGGCTAACTACGTGCCAGCAGCCGCGGTAATACGTAGGTGGC<br/> AAGCGTTGTCCGGATTTATTGGGCGTAAAGCGAGCGCAGGCGGAAGAATAAGTCTGATGTGAAAGCCCTCGGCTTAA<br/> CCGAGGAATTGCATCGGAAACTGTTTTTCTTGAGTGCAGAAGAGGAGAGTAGAACTCCATGTGTAGCGGTGGAATGC<br/> GTAGATATATGGAAGAATACCAGTGGCGAAGGCGGCTCTCTGGTCTGCAACTGACGCTGAGGCTCGAAAGCATGGGT<br/> AGCGAACAGGATTAGATACCCTGGTAGTCCATGCCGTAACGATGAGTGCTAAGTGTGGGAGGCTTCCGCCTCTCAG<br/> TGCTGCAGCTAACGCATTAAGCACTCCGCCTGGGGAGTACGACCGCAAGGTTGAAACTCAAAGGAATTGACGGGGGC<br/> CCGCACAAGCGGTGGAGCATGTGGTTTAAATTCGAAGCAACGCGAAGAACCTTACCAGGTCTTGACATCTAGTGCCATT<br/> TGTAGAGATACAAAGTTCCCTTCGGGGACGCTAAGACAGGTGGTGCATGGCTGTCGTCAGCTCGTGTGCTGAGATGTT<br/> GGGTTAAGTCCCGCAACGAGCGCAACCCCTTGTTATTAGTTGCCAGCATTAAAGTTGGGCACTCTAATGAGACTGCCGGT<br/> GACAAACCGGAGGAAGGTGGGGATGACGTCAAGTCATCATGCCCTTATGACCTGGGCTACACACGTGCTACAATGG<br/> GCAGACAACGAGCAGCGAGCCTGCAAAGGCAAGCAAATCTCTGAAAGCTGTTCTCAGTTCGGACTGCAGTCTGCAA<br/> CTCGACTGCACGAAGCTGGAATCGTAGTAATCGCGGATCAGCACGCCGCGGTGAATACGTTCCCGGGCCTTGTACAC<br/> ACCGCCCGTCACACCATGGGAGTCTGCAATGCCCAAAGCCGGTGGCCTAACCGCAAGGAAGGAGCCGTCTAAGGCAG<br/> GGCAGATGACTGGGGTGAAGTCGTAACAAGGTAGCCGTAGGAGAACC</p>                                                                                                                                                                                                                                                                                                               |
|  | <p>TMPC<br/>4D128</p> | <p>GTGCACCGGGCGGCGTGCTATACATGCAAGTCGAGCGAGCGGAACCAGCAGAATCACTTCGGTGAGGACGCTGGGAA<br/> AGCGAGCGGCGGATGGGTGAGTAACACGTGGGGAACCTGCCCTTAAGTCTGGGATACCCTTGGAACAGGTGCTAA<br/> TACCGGATAAGAAAGCAGTTCGCATGAACAGCTTTTAAAAGGCGGCGCAAGCTGTGCTAAAGGATGGACCCGCGGT<br/> GCATTAGCTAGTTGGTAAGGTAACGGCCTACCAAGGCAGTGATGCATAGCCGAGTTGAGAGACTGATCGGCCACATT<br/> GGGACTGAGACACGGCCCAAACCTCCTACGGGAGGCAGCAGTAGGGAATCTTCCACAATGGACGCAAGTCTGATGGAG<br/> CAACGCCGCGTGAGTGAAGAAGGTTTTTCGGACCGTAAAGCTCTGTTGTTGGTGAAGAAGGATAGAGGTAGTAACTGG<br/> CCTTTATTTGACGGTAATCAACCAGAAAAGTCACGGCTAACTACGTGCCAGCAGCCGCGGTAATACGTAGGTGGCAAGC<br/> GTTGTCCGGATTTATTGGGCGTAAAGCGAGCGCAGGCGGAAGAATAAGTCTGATGTGAAAGCCCTCGGCTTAACCGA<br/> GGAATTGCATCGGAAACTGTTTTTCTTGAGTGCAGAAGAGGAGAGTAGAACTCCATGTGTAGCGGTGGAATGCGTAG<br/> ATATATGGAAGAATAACCAGTGGCGAAGGCGGCTCTCTGGTCTGCAACTGACGCTGAGGCTCGAAAGCATGGGTAGCG<br/> AACAGGATTAGATACCCTGGTAGTCCATGCCGTAACGATGAGTGCTAAGTGTGGGAGGCTTCCGCCTCTCAGTGCT<br/> GCAGCTAACGCATTAAGCACTCCGCCTGGGGAGTACGACCGCAAGGTTGAAACTCAAAGGAATTGACGGGGGCCCGC<br/> ACAAGCGGTGGAGCATGTGGTTTAAATTCGAAGCAACGCGAAGAACCTTACCAGGTCTTGACATCTAGTGCCATTTGTA<br/> GAGATACAAAGTCCCTTCGGGGACGCTAGACAGGTGGTGCATGGCTGTCGTCAGCTCGTGTGCTGAGATGTGGGTAG<br/> TCCGCACGAGCGCACCCCTTGTATAGTGCAGCATAAGTGGGCCCTCTATGAGACTGCGGTGACACGGAGAGGTGGGGAT<br/> GACGTCAGTCATCATGCCCTTATGACTGGCTACCACGTGCTAAATGGCAGCCACAGCACGGACCTGCAGCAGCATCTG<br/> GAGCGTTTTAGTCGACGACGACTCACTGCAACTGAATCGTGAATCCGATACAACGCGCGGGAATCTTCGCTGTTACCT<br/> CCGCCGCTCACACTG</p> |
|  | <p>TMPC<br/>4D176</p> | <p>GTGCAAGGGCGGCGTGCTATACATGCAAGTCGAGCGAGTGGAACCAGCAGAATCACTTCGGTGAGGACGCTGGGAAA<br/> GCGAGCGGCGGATGGGTGAGTAACACGTGGGGAACCTGCCCTTAAGTCTGGGATACCCTTGGAACAGGTGCTAAT</p>                                                                                                                                                                                                                                                                                                                                                                                                                                                                                                                                                                                                                                                                                                                                                                                                                                                                                                                                                                                                                                                                                                                                                                                                                                                                                                                            |

|                                            |                                     |                                                                                                                                                                                                                                                                                                                                                                                                                                                                                                                                                                                                                                                                                                                                                                                                                                                                                                                                                                                                                                                                                                                                                                                                                                                                                                                                          |
|--------------------------------------------|-------------------------------------|------------------------------------------------------------------------------------------------------------------------------------------------------------------------------------------------------------------------------------------------------------------------------------------------------------------------------------------------------------------------------------------------------------------------------------------------------------------------------------------------------------------------------------------------------------------------------------------------------------------------------------------------------------------------------------------------------------------------------------------------------------------------------------------------------------------------------------------------------------------------------------------------------------------------------------------------------------------------------------------------------------------------------------------------------------------------------------------------------------------------------------------------------------------------------------------------------------------------------------------------------------------------------------------------------------------------------------------|
|                                            |                                     | <p>ACCGGATAAGAAAGCAGTTCGCATGAACAGCTTTTAAAAGGCGGCGCAAGCTGTCGCTAAAGGATGGACCCGCGGTG<br/> CATTAGCTAGTTGGTAAGGTAACGGCCTACCAAGGCAGTGATGCATAGCCGAGTTGAGAGACTGATCGGCCACATTG<br/> GGACTGAGACACGGCCAAACTCCTACGGGAGGCAGCAGTAGGGAATCTTCCACAATGGACGCAAGTCTGATGGAGC<br/> AACGCCGCGTGAGTGAAGAAGGTTTTTCGGACCGTAAAGCTCTGTTGTTGGTGAAGAAGGATAGAGGTAGTAACTGGC<br/> CTTTATTTGACGGTAATCAACCAGAAAAGTCACGGCTAACTACGTGCCAGCAGCCGCGGTAATACGTAGGTGGCAAGCG<br/> TTGTCCGGATTTATTGGGCGTAAAGCGAGCGCAGGCGGAAGAATAAGTCTGATGTGAAAGCCCTCGGCTTAACCGAG<br/> GAATTGCATCGGAAACTGTTTTCTTGAGTGCAGAAGAGGAGAGTAGAACTCCATGTGTAGCGGTGGAATGCGTAGAT<br/> ATATGGAAGAATACCAGTGGCGAAGGCGGCTCTCTGGTCTGCAACTGACGCTGAGGCTCGAAAGCATGGGTAGCGAA<br/> CAGGATTAGATACCCTGGTAGTCCATGCCGTAACGATGAGTGTAAAGTGTGGGAGGCTTCCGCCTCTCAGTGCTGC<br/> AGCTAACGCATTAAGCACTCCGCCTGGGGAGTACGACCGCAAGGTTGAAACTCAAAGGAATTGACGGGGGCCCGCAC<br/> AAGCGGTGGAGCATGTGGGTTAATTCGAAGCAACCGCAAGAACCTTACCAGGTCTTGACATCTAGTGCCATTTGTAG<br/> AGATACAAAGTTCCCTTCGGGGACGCTAAGACAGGTGTGCATGGCTGTCGTCAGCTCGTGTGAGATGTGGGTAAG<br/> TCCGCACGAGCGCAACCTGTATAGTGCAGCATAAGTGGCACTCTAATGAGAAGTGCCTGACAACGGAGAGGTGGATGA<br/> CGTCAGTCATCATGCCCTTATGACTGGCTACACACGTGCTACAATGGTACACAACAGGCAGCGAGCCTGCCAGGCAAG<br/> CCA</p>                                                                                                                    |
|                                            | <p>TMPC<br/>4D178</p>               | <p>AAAGCAAATTGCGGGCGTGCCTATACATGCAAGTCGAGCGAGCGGAACCAGCAGAATCACTTCGGTGAGGACGCTGG<br/> GAAAGCGAGCGGCGGATGGGTGAGTAACACGTGGGGAACCTGCCCTTAAGTCTGGGATACCACTTGGAACAGGTGC<br/> TAATACCGGATAAGAAAGCAGTTCGCATGAACAGCTTTTAAAAGGCGGCGCAAGCTGTCGCTAAAGGATGGACCCGC<br/> GGTGCATTAGCTAGTTGGTAAGGTAACGGCCTACCAAGGCAGTGATGCATAGCCGAGTTGAGAGACTGATCGGCCAC<br/> ATTGGGACTGAGACACGGCCAAACTCCTACGGGAGGCAGCAGTAGGGAATCTTCCACAATGGACGCAAGTCTGATG<br/> GAGCAACGCCGCGTGAGTGAAGAAGGTTTTTCGGACCGTAAAGCTCTGTTGTTGGTGAAGAAGGATAGAGGTAGTAAC<br/> TGGCCTTTATTTGACGGTAATCAACCAGAAAAGTCACGGCTAACTACGTGCCAGCAGCCGCGGTAATACGTAGGTGGCA<br/> AGCGTTGTCCGGATTTATTGGGCGTAAAGCGAGCGCAGGCGGAAGAATAAGTCTGATGTGAAAGCCCTCGGCTTAAC<br/> CGAGGAATTGCATCGGAAACTGTTTTCTTGAGTGCAGAAGAGGAGAGTAGAACTCCATGTGTAGCGGTGGAATGCGT<br/> AGATATATGGAAGAATACCAGTGGCGAAAGGCGGCTCTCTGGTCTGCAACTGACGCTGAGGCTCGAAAGCATGGGTA<br/> GCGAACAGGATTAGATACCCTGGTAGTCCATGCCGTAACGATGAGTGTAAAGTGTGGGAGGCTTCCGCCTCTCAGTG<br/> CTGCAGCTAACGCATTAAGCACTCCGCCTGGGAGTACGACCCGCAAGGTTGAAACTCAAAGGAATTGACGGGGCCCG<br/> CACCACCGGTGGAGCATGGGGTTTATTCCGAAGCAACCGCAAAAACCTTACCAGTCCTGACTTCTAGTGCCATTTGGA<br/> AATTACCAAAGTTCCCTTCGGACGCTCAAACACGAGGTGCATGGACTGTCTCCGCTCGAGTCAGCAAAATGTGGTTA<br/> ACTCCCGCACGAACGCAACCTCTGGTAATGATGTGCAGGATAAGTGGGCCATCTATGGAAACTGGCCGGTGAACATA<br/> CACCGGGAAGAATGGTGGCATGAACGCTCAAAGT</p> |
| <p><i>Lactobacillus<br/>ultunensis</i></p> | <p>Lactobacillus<br/>ultunensis</p> | <p>GTTTGATCCTGGCTCAGGACGAACGCTGGCGGCGTGCCTAATACATGCAAGTTCGAGCGAGCGGAACCAGCAGATCTG<br/> CTTCGGCAGTGACGCTGGGAAAGCGAGCGGCGGATGGGTGAGTAACACGTGGGGAACCTGCCCAAAGTCTGGGATA<br/> CCTTGGAAACAGGTGCTAATACCGGATAAGAAAGCAGATCGCATGATCAGCTTTTAAAAGGCGGCGTAAGCTGTC</p>                                                                                                                                                                                                                                                                                                                                                                                                                                                                                                                                                                                                                                                                                                                                                                                                                                                                                                                                                                                                                                                                                 |



|  |         |                                                                                                                                                                                                                                                                                                                                                                                                                                                                                                                                                                                                                                                                                                                                                                                                                                                                                                                                                                                                                                                                                                                                                                                                                                                                                                                                                                                                                                                                                    |
|--|---------|------------------------------------------------------------------------------------------------------------------------------------------------------------------------------------------------------------------------------------------------------------------------------------------------------------------------------------------------------------------------------------------------------------------------------------------------------------------------------------------------------------------------------------------------------------------------------------------------------------------------------------------------------------------------------------------------------------------------------------------------------------------------------------------------------------------------------------------------------------------------------------------------------------------------------------------------------------------------------------------------------------------------------------------------------------------------------------------------------------------------------------------------------------------------------------------------------------------------------------------------------------------------------------------------------------------------------------------------------------------------------------------------------------------------------------------------------------------------------------|
|  |         | <p>GCTATGGGATGGCCCCGCGGTGCATTAGCTAGTTGGTAGAGTAACGGCCTACCAAGGCAATGATGCATAGCCGAGTTG<br/> AGAGACTGATCGGCCACATTGGGACTGAGACACGGCCAACTCCTACGGGAGGCAGCAGTAGGGAATCTTCCACAA<br/> TGGACGCAAGTCTGATGGAGCAACGCCGCGTGAGTGAAGAAGGTTTTTCGGATCGTAAAGCTCTGTTGTTGGTGAAGA<br/> AGGATAGAGGTAGTAACCTGGCCTTTATTTGACGGTAATCAACCAGAAAGTCACGGCTAACTACGTGCCAGCAGCCGC<br/> GGTAATACGTAGGTGGCAAGCGTTGTCCGATTTATTGGGCGTAAAGCGAGCGCAGGCGGAAAAATAAGTCTAATGT<br/> GAAAGCCCTCGGCTTAACCGAGGAACTGCATCGGAAACTGTTTTTCTTGAGTGCAGAAGAGGAGAGTGGAACTCCAT<br/> GTGTAGCGGTGGAATGCGTAGATATATGGAAGAACACCAGTGGCGAAGGCGGCTCTCTGGTCTGCAACTGACGCTGA<br/> GGCTCGAAAGCATGGGTAGCGAACAGGATTAGATACCCTGGTAGTCCATGCCGTAACGATGAGTGCTAAGTGTTGG<br/> GAGGTTTCCGCCTCTCAGTGCTGCAGCTAACGCATTAAGCACTCCGCCTGGGGAGTACGACCGCAAGGTTGAAACTCA<br/> AAGGAATTGACGGGGGCCGCACAAGCGGTGGAGCATGTGGTTTAATTCGAAGCAACGCGAAGAACCTTACCAGGTC<br/> TTGACATCTAGTGCCATCTTCAGAGATGAAGAGTTCCCTTCGGGGACGCTAAGACAGGTGGTGCATGGCTGTCGTCAG<br/> CTCGTGTGTCGTGAGATGTTGGGTTAAGTCCCACAACGAGCGCAACCCTTGTTATTAGTTGCCAGCATTAAAGTTGGGCACT<br/> CTAATGAGACTGCCGGTGACAAACCGGAGGAAGGTGGGGATGACGTCAAGTCATCATGCCCTTATGACCTGGGCTA<br/> CACACGTGCTACAATGGGCAGTACAACGAGAAGCGAGCCTGCGAAGGCAAGCGAATCTCTGAAAGCTGTTCTCAGTT<br/> CGGACTGCAGTCTGCAACTCGACTGCACGAAGCTGGAATCGCTAGTAATCGCGGATCAGCACGCCGCGGTGAATACG<br/> TTCCCGAGCCTTGTACACACCGCCCGTACACCATGGGAGTCTGCAACGCCCAAAGCCGGTGGCCTAACCGAAAGGA<br/> AGGAGCCGTCTAAGGCAGGGCAGATGACTGGGGTGAAGTCGTAACAAGGTAGCCGTAGGAGAACCTGCGGCTGGATC<br/> ACCTC</p> |
|  | Kx146C1 | <p>GTTTGATCCTGGCTCAGGACGAACGCTGGCGGCGTGCCTAATACATGCAAGTCGAGCGAGCGGAACCAGCAGATCTG<br/> CTTCGGCAGTGACGCTGGGAAAGCGAGCGGCGGATGGGTGAGTAACACGTGGGGAACCTGCCCAAAGTCTGGGATA<br/> CCACTTGGAACAGGTGCTAATACCGGATAAGAAAGCAGATCGCATGATCAGCTTTTTAAAAGGCGGGCGTAAGCTGTC<br/> GCTATGGGATGGCCCCGCGGTGCATTAGCTAGTTGGTAGAGTAACGGCCTACCAAGGCAATGATGCATAGCCGAGTTG<br/> AGAGACTGATCGGCCACATTGGGACTGAGACACGGCCAACTCCTACGGGAGGCAGCAGTAGGGAATCTTCCACAA<br/> TGGACGCAAGTCTGATGGAGCAACGCCGCGTGAGTGAAGAAGGTTTTTCGGATCGTAAAGCTCTGTTGTTGGTGAAGA<br/> AGGATAGAGGTAGTAACCTGGCCTTTATTTGACGGTAATCAACCAGAAAGTCACGGCTAACTACGTGCCAGCAGCCGC<br/> GGTAATACGTAGGTGGCAAGCGTTGTCCGATTTATTGGGCGTAAAGCGAGCGCAGGCGGAAAAATAAGTCTAATGT<br/> GAAAGCCCTCGGCTTAACCGAGGAACTGCATCGGAAACTGTTTTTCTTGAGTGCAGAAGAGGAGAGTGGAACTCCAT<br/> GTGTAGCGGTGGAATGCGTAGATATATGGAAGAACACCAGTGGCGAAGGCGGCTCTCTGGTCTGCAACTGACGCTGA<br/> GGCTCGAAAGCATGGGTAGCGAACAGGATTAGATACCCTGGTAGTCCATGCCGTAACGATGAGTGCTAAGTGTTGG<br/> GAGGTTTCCGCCTCTCAGTGCTGCAGCTAACGCATTAAGCACTCCGCCTGGGGAGTACGACCGCAAGGTTGAAACTCA<br/> AAGGAATTGACGGGGGCCGCACAAGCGGTGGAGCATGTGGTTTAATTCGAAGCAACGCGAAGAACCTTACCAGGTC<br/> TTGACATCTAGTGCCATCTTCAGAGATGAAGAGTTCCCTTCGGGGACGCTAAGACAGGTGGTGCATGGCTGTCGTCAG<br/> CTCGTGTGTCGTGAGATGTTGGGTTAAGTCCCACAACGAGCGCAACCCTTGTTATTAGTTGCCAGCATTAAAGTTGGGCACT<br/> CTAATGAGACTGCCGGTGACAAACCGGAGGAAGGTGGGGATGACGTCAAGTCATCATGCCCTTATGACCTGGGCTA</p>                                                                                              |

|  |                       |                                                                                                                                                                                                                                                                                                                                                                                                                                                                                                                                                                                                                                                                                                                                                                                                                                                                                                                                                                                                                                                                                                                                                                                                                                                                                                                                                                                                                               |
|--|-----------------------|-------------------------------------------------------------------------------------------------------------------------------------------------------------------------------------------------------------------------------------------------------------------------------------------------------------------------------------------------------------------------------------------------------------------------------------------------------------------------------------------------------------------------------------------------------------------------------------------------------------------------------------------------------------------------------------------------------------------------------------------------------------------------------------------------------------------------------------------------------------------------------------------------------------------------------------------------------------------------------------------------------------------------------------------------------------------------------------------------------------------------------------------------------------------------------------------------------------------------------------------------------------------------------------------------------------------------------------------------------------------------------------------------------------------------------|
|  |                       | <p>CACACGTGCTACAATGGGCAGTACAACGAGAAGCGAGCCTGCGAAGGCAAGCGAATCTCTGAAAGCTGTTCTCAGTT<br/> CGGACTGCAGTCTGCAACTCGACTGCACGAAGCTGGAATCGCTAGTAATCGCGGATCAGCACGCCGCGGTGAATACG<br/> TTCCCGAGCCTTGTACACACCGCCCGTCACACCATGGGAGTCTGCAACGCCCAAAGCCGGTGGCCTAACCGAAAGGA<br/> AGGAGCCGTCTAAGGCAGGGCAGATGACTGGGGTGAAGTCGTAACAAGGTAGCCGTAGGAGAACCTGCGGCTGGATC<br/> ACCTC</p>                                                                                                                                                                                                                                                                                                                                                                                                                                                                                                                                                                                                                                                                                                                                                                                                                                                                                                                                                                                                                                                                      |
|  | <p>TMPC<br/>4D12A</p> | <p>GGCGTGCGGGAGCTATACATGCAGTCGAGCGAGCGGAACCAGCAGAATCACTTCCGGTGAAGGACGCTGGGAAAGCGA<br/> GCGGCGGATGGGTGAGTAACACGTGGGGAACCTGCCCTTAAGTCTGGGATACCACTTGAAACAGGTGCTAATACCG<br/> GATAAGAAAGCAGTTTCGCATGAACAGCTTTTAAAAGGCGGCGCAAGCTGTGCTAAAGGATGGACCCGCGGTGCATT<br/> AGCTAGTTGGTAAGGTAACGGCCTACCAAGGCAGTGATGCATAGCCGAGTTGAGAGACTGATCGGCCACATTGGGAC<br/> TGAGACACGGCCCAAACCTCCTACGGGAGGCAGCAGTAGGGAATCTTCCACAATGGACGCAAGTCTGATGGAGCAACG<br/> CCGCGTGAGTGAAGAAGGTTTTCGGACCGTAAAGCTCTGTTGTTGGTGAAGAAGGATAGAGGTAGTAACCTGGCCTTTA<br/> TTTGACGGTAATCAACCAGAAAGTCACGGCTAACTACGTGCCAGCAGCCGCGGTAATACGTAGGTGGCAAGCGTTGTC<br/> CGGATTTATTGGGCGTAAAGCGAGCGCAGGCGGAAGAATAAGTCTGATGTGAAAGCCCTCGGCTTAACCGAGGAATT<br/> GCATCGGAAACTGTTTTCTTGAGTGCAGAAGAGGAGAGTAGAACTCCATGTGTAGCGGTGGAATGCGTAGATATATG<br/> GAAGAATACCAGTGGCGAAGGCGGCTCTCTGGTCTGCAACTGACGCTGAGGCTCGAAAGCATGGGTAGCGAACAGGA<br/> TTAGATAACCTGGTAGTCCATGCCGTAACGATGAGTGCTAAGTGTGGGAGGCTTCCGCCTCTCAGTGCTGCAGCTA<br/> ACGCATTAAGCACTCCGCCTGGGGAGTACGACCGCAAGGTTGAAACTCAAAGGAATTGACGGGGGCCCGCACAAAGCG<br/> GTGGAGCATGTGGTTAATTGAAGCAACGCGAAGAACCTTACCAGGTCTTGACATCTAGTGCCATTTGTAGAGATA<br/> AAAGTTCCCTTCGGGGACGCTAAGAACAGGTGGTGCATGCTGTCGTCAGCTCGTGTGTCGTGAGATGTTGGGTAAGTCCG<br/> CACGAGCGCAACCCTTGTATTAGTTGCCAGCATAAGTACACTTCTATGAGACTGCCGGTGACAACGAGGAGGTGGGA<br/> TGACGTCAGTCATCATGCCTTATGACTGGCTCACACACGTGCTACATGGCCAGCACGAGGCACGAGACCTGCAAAGTC<br/> AAGCAATCTCTTAGAGGCGTGTCTCTCACAGA</p> |
|  | <p>TMPC<br/>46M11</p> | <p>CGGCATCGGCGCTATAATGCAGTCGAGCGAGCAGAACCAGCAGATTTACTTCGGTAATGACGCTGGGGACGCGAGCG<br/> GCGGATGGGTGATTAACACGTGGGGAACCTGCCCCATAGTCTAGGATACCACTTGAAACAGGTGCTAATACCGGAT<br/> AATAAAGCAGATCGCATGATCAGCTTATAAAAGGCGGCGTAAGCTGTGCTATGGGATGGCCCCGCGGTGCATTAGCT<br/> AGTTGGTAAGGTAACGGCTTACCAAGGCAATGATGCATAGCCGAGTTGAGAGACTGAACGGCCACATTGGGACTGAG<br/> ACACGGCCCAAACCTCCTACGGGAGGCAGCAGTAGGGAATCTTCCACAATGGACGCAAGTCTGATGGAGCAACGCCGC<br/> GTGAGTGAAGAAGGTTTTCGGATCGTAAAGCTCTGTTGTTGGTGAAGAAGGATAGAGGTAGTAACCTGGCCTTTATTTG<br/> ACGGTAATCAACCAGAAAGTCACGGCTAACTACGTGCCAGCAGCCGCGGTAATACGTAGGTGGCAAGCGTTGTCCGG<br/> ATTTATTGGGCGTAAAGCGAGCGCAGGCGGAAGAATAAGTCTGATGTGAAAGCCCTCGGCTTAACCGAGGAATTGCA<br/> TCGGAAACTGTTTTCTTGAGTGCAGAAGAGGAGAGTGGAACTCCATGTGTAGCGGTGGAATGCGTAGATATATGGAA<br/> GAACACCAGTGGCGAAGGCGGCTCTCTGGTCTGCAACTGACGCTGAGGCTCGAAAGCATGGGTAGCGAACAGGATTA<br/> GATAACCTGGTAGTCCATGCCGTAACGATGAGTGCTAAGTGTGGGAGGTTTTCCGCCTCTCAGTGCTGCAGCTAACG<br/> CATTAAAGCACTCCGCCTGGGGAGTACGACCGCAAGGGTTGAAACTCAAAGGAATTGACGGGGGCCCGCACAAAGCGGT</p>                                                                                                                                                                                                                                                                                                                                                                                     |

|             |                  |                                                                                                                                                                                                                                                                                                                                                                                                                                                                                                                                                                                                                                                                                                                                                                                                                                                                                                                                                                                                                                                                                                                                                                                                                                                                                                                                                                                   |
|-------------|------------------|-----------------------------------------------------------------------------------------------------------------------------------------------------------------------------------------------------------------------------------------------------------------------------------------------------------------------------------------------------------------------------------------------------------------------------------------------------------------------------------------------------------------------------------------------------------------------------------------------------------------------------------------------------------------------------------------------------------------------------------------------------------------------------------------------------------------------------------------------------------------------------------------------------------------------------------------------------------------------------------------------------------------------------------------------------------------------------------------------------------------------------------------------------------------------------------------------------------------------------------------------------------------------------------------------------------------------------------------------------------------------------------|
|             |                  | <p>GGAGCATGTGGGTTTAATTCGAAGCAACGCGAAGAACCCTTACCAGGTCTTGACATCTAGTGCATCCTAAGAGATTAGG<br/> AGTTCCCTTTTCGGGGACGCTAAGACAGGTGTGCATGACTGTCGTCAGCTCGTGTGAGATGTGGGTAGTCCGCACG<br/> AGCGCACCTATATAGTGCAGCATAGGTGGCACTCTATGAGACTGACGATGAACAACCGGAGG</p>                                                                                                                                                                                                                                                                                                                                                                                                                                                                                                                                                                                                                                                                                                                                                                                                                                                                                                                                                                                                                                                                                                                                      |
|             | <p>TMPC4D171</p> | <p>GGCAGGCACGGCTATACATGCAAGTTCGAGCGAGTGGAAACCAGCAGAATCACTTCCGGTGAGGACGCTGGGAAAGCGA<br/> GCGGCGGATGGGTGAGTAACACGTGGGGAACCTGCCCTTAAGTCTGGGATACCACTTGGAAACAGGTGCTAATACCG<br/> GATAAGAAAGCAGTTTCGCATGAACAGCTTTTAAAAGGCGGCGCAAGCTGTGCTAAAGGATGGACCCGCGGTGCATT<br/> AGCTAGTTGGTAAGGTAACGGCCTACCAAGGCAGTGATGCATAGCCGAGTTGAGAGACTGATCGGCCACATTGGGAC<br/> TGAGACACGGCCCAAACCTCCTACGGGAGGCAGCAGTAGGGAATCTTCCACAATGGACGCAAGTCTGATGGAGCAACG<br/> CCGCGTGAGTGAAGAAGGTTTTTCGGACCGTAAAGCTCTGTTGTTGGTGAAGAAGGATAGAGGTAGTAAGTGGCCTTTA<br/> TTTGACGGTAATCAACCAGAAAGTCACGGCTAACTACGTGCCAGCAGCCGCGGTAATACGTAGGTGGCAAGCGTTGTC<br/> CGGATTTATTGGGCGTAAAGCGAGCGCAGGCGGAAGAATAAGTCTGATGTGAAAGCCCTCGGCTTAACCGAGGAATT<br/> GCATCGGAAACTGTTTTCTTGAGTGCAGAAGAGGAGAGTAGAACTCCATGTGTAGCGGTGGAATGCGTAGATATATG<br/> GAAGAATACCAGTGGCGAAGGCGGCTCTCTGGTCTGCAACTGACGCTGAGGCTCGAAAGCATGGGTAGCGAACAGGA<br/> TTAGATAACCTGGTAGTCCATGCCGTAACGATGAGTGCTAAGTGTGGGAGGCTTCCGCCTCTCAGTGCTGCAGCTA<br/> ACGCATTAAGCACTCCGCCTGGGGAGTACGACCGCAAGGTTGAAACTCAAGGAATTGACGGGGGCCGCACAAGCGG<br/> TGGAGCATGTGGTTTAATTCGAGCACGCGAGATCTTACCAGGTCTTGACATCTAGTGCATTTGTAGAGATAACAAGTTC<br/> CTTCGGGACGCTAGACAGTGATGCATGCTGTCGTCAGCTCGTGTGAGATGTTGGGTAGTCCCGCACGAGCGCAAC<br/> CTTGTTATTAGTTG</p>                                                                                                                                               |
| <p>GS01</p> | <p>JCP8108</p>   | <p>GGATCTGACCAGCTTGCTGGTTGGTGAGAGTGGCGAACGGGTGAGTAATGCGTGACCAACCTGCCCATGCTCCAGAA<br/> TAGCTCTTGAAACGGGTGGTAATGCTGGATGCTCCAACCTTACGCATGTCTTGTGGGAAAGTGTTTAGTGGCATGG<br/> GATGGGGTCGCGTCCTATCAGCTTGTAGGCGGGTAATGGCCACCTAGGCTTCGACGGGTAGCCGGCCTGAGAGGG<br/> CGGACGGCCACATTGGGACTGAGATACGGCCAGACTCCTACGGGAGGCAGCAGTGGGGAATATTGCGCAATGGGGG<br/> GAACCCTGACGCAGCGACCGCGGTGCGGGATGAAGGCCTTCGGGTTGTAACCGCTTTTGATTGGGAGCAAGCGGG<br/> TGAGTGTACCTTTTGAATAAGCGCCGGCTAACTACGTGCCAGCAGCCGCGGTAATACGTAGGGCGCAAGCGTTATCCG<br/> GAATTATTGGGCGTAAAGAGCTTGTAGGCGGTTCTGTCGCGTCTGGTGTGAAAGCCATCGCTTAACGGTGGGTTTTCG<br/> CCGGGTACGGGCGGGCTAGAGTGCAGTAGGGGAGACTGGAATTCTCGGTGTAACGGTGGAAATGTGTAGATATCGGGA<br/> AGAACACCAATGGCGAAGGCAGGTCTCTGGGCTGTTACTGACGCTGAGAAGCGAAAGCGTGGGGAGCGAACAGGATT<br/> AGATAACCTGGTAGTCCACGCCGTAACGGTGGACGCTGGATGTGGGGCCCATTCACGGGTTCTGTGTGCGGAGCTAA<br/> CGCGTTAAGCGTCCCGCCTGGGGAGTACGGCCGCAAGGCTAAAACCTCAAAGAAATTGACGGGGGCCGCACAAGCGG<br/> CGGAGCATGCGGATTAATTCGATGCAACGCGAAGAACCCTTACCTGGGCTTGACATGTGCTGACGACTGCAGAGATGT<br/> GGTTTCCTTTTCGGGGCAGGTTACAGGTGGTGCATGGTCGTCGTCAGCTCGTGTGAGATGTTGGGTTAAGTCCCGC<br/> AACGAGCGCAACCCTCGCCCTGTGTTGCCAGCGGGTTATGCCGGGAACTCACGGGGGACC CGCGGGGTTAACTCGGA<br/> GGAAGGTGGGGATGACGTGAGATCATCATGCCCTTACGTCCAGGGCTTACGCATGCTACAATGGCCAGTACAACGG<br/> GTTGCTTCATGGTGACATGGTGCTAATCCCTTAAAACCTGGTCTCAGTTCGGATCGTAGTCTGCAACTCGACTACGTGAA</p> |

|  |            |                                                                                                                                                                                                                                                                                                                                                                                                                                                                                                                                                                                                                                                                                                                                                                                                                                                                                                                                                                                                                                                                                                                                                                                                                                                                                                                                                                                                                                                                                                                                                                                       |
|--|------------|---------------------------------------------------------------------------------------------------------------------------------------------------------------------------------------------------------------------------------------------------------------------------------------------------------------------------------------------------------------------------------------------------------------------------------------------------------------------------------------------------------------------------------------------------------------------------------------------------------------------------------------------------------------------------------------------------------------------------------------------------------------------------------------------------------------------------------------------------------------------------------------------------------------------------------------------------------------------------------------------------------------------------------------------------------------------------------------------------------------------------------------------------------------------------------------------------------------------------------------------------------------------------------------------------------------------------------------------------------------------------------------------------------------------------------------------------------------------------------------------------------------------------------------------------------------------------------------|
|  |            | <p>GGCGGAGTCGCTAGTAATCGCGAATCAGCAACGTCGCGGTGAATGCGTTCCCGGGCCTTGTACACACCGCCCGTCAAGTCATGAAAGTGGGCAGCACCCGAAGCCGGTGGCCTAACCCTTTTGGGATGGAGCCGTCTAAGGTGAGGCT</p>                                                                                                                                                                                                                                                                                                                                                                                                                                                                                                                                                                                                                                                                                                                                                                                                                                                                                                                                                                                                                                                                                                                                                                                                                                                                                                                                                                                                                           |
|  | UGent25.49 | <p>TGGAGGGTTCGATTCTGGCTCAGGATGAACGCTGGCGGGGTGCTTAACACATGCAAGTCGAACGGGATCTGACCAGCTTGCTGGTTGGTGAGAGTGGCGAACGGGTGAGTAATGCGTGACCAACCTGCCCATGCTCCAGAATAGCTCTTGAAACGGTGGTAATGCTGGATGCTCCAACCTGACGCATGTCTTGTGGGAAAGTGTTAGTGGCATGGGATGGGGTCGCGTCTATCAGCTTGTAGGCGGGTAATGGCCACCTAGGCTTCGACGGGTAGCCGGCCTGAGAGGGCGGACGGCCACATTGGGACTGAGATACGGCCCAGACTCCTACGGGAGGCAGCAGTGGGGAATATTGCGCAATGGGGGAAACCCTGACGCAGCGACGCCGCGTGCGGGATGAAGGCCTTCGGGTTGTAAACCGCTTTTGATTGGGAGCAAGCCTTTTGGGTGAGTGTACCTTCGAATAAGCGCCGGCTAACTACGTGCCAGCAGCCGCGTAATACGTAGGGCGCAAGCAGTTATCCGGAATTATTGGCGTAAAGAGCTTGTAGGCGGTTCTGTCGCGTCTGGTGTGAAAGCCATCGCTTAACGGTGGGTTTTCGCGCCGGGTACGGCGGGCTAGAGTGCAGTAGGGGAGACTGGAATTCTCGGTGTAACGGTGGAAATGTGTAGATATCGGGAAGAACACCAATGGCGAAGGCAGGTCTCTGGGCTGTTACTGACGCTGAGAAGCGAAAGCGTGGGGAGCGAACAGGATTAGATACCCTGTAGTCCACGCCGTAACCGGTGGACGCTGGATGTGGGGCCATTCCACGGGTTCTGTGTTCGGAGCTAACCGGTTAAGGTCCCCTGGGAGTACGGCCGCAAGGCTAAAACCTCAAAGAAATTGACGGGGGCCGCACAAGCGGCGGAGCATGGGATTAATTCGATGCAACGCGAAGAACCCTTACCTGGGCTTGACATGTGCCTGACGACTGCAGAGATGTGGTTTCCTTTTCGGGGCAGGTTACAGGTGGTGCATGGTCTGTCGTCAGCTCGTGTGTCGTGAGATGTTGGGTTAAGTCCCAGCAACGAGCGCAACCCTCGCCCTGTGTTGCCAGCGGGTTATGCCGGGAACCTCACGGGGGACCGCCGGGGTTAACTCGGAGGAAGGTGGGGATGACGTCAGATCATCATGCCCTTACGTCCAGGGCTTCACGCATGCTACAATGGCCAGTACAACGGGTTGCTTCAATGGTGACATGGTGTAACTCCCTTAAAACCTGGTCTCAGTTCGGATCGTAGTCTGCAACTCGACTACGTGAAGGCGGAGTCGCTAGTAATCGCGAATCAGCAACGTCGCGGTGAATGCGTTCCCGGGCCTTGTACACACCGCCCGTCAAGTCATGAAAGTGGGCAGCACCCGAAGCCGGTGGCCTAACCCTTTTGGGATGGAGCCGTCTAAGGTGAGGCTCGTGATTGGGACTAAGTTCGTAACAAGGTAGCCGTACCGGAAGGTGCGGCTGGATCACCTCCTTT</p> |
|  | UGent09.01 | <p>TGGAGGGTTCGATTCTGGCTCAGGATGAACGCTGGCGGGGTGCTTAACACATGCAAGTCGAACGGGATCTGACCAGCTTGCTGGTTGGTGAGAGTGGCGAACGGGTGAGTAATGCGTGACCAACCTGCCCATGCTCCAGAATAGCTCTTGAAACGGTGGTAATGCTGGATGCTCCAACCTGACGCATGTCTTGTGGGAAAGTGTTAGTGGCATGGGATGGGGTCGCGTCTATCAGCTTGTAGGCGGGTAATGGCCACCTAGGCTTCGACGGGTAGCCGGCCTGAGAGGGCGGACGGCCACATTGGGACTGAGATACGGCCCAGACTCCTACGGGAGGCAGCAGTGGGGAATATTGCGCAATGGGGGAAACCCTGACGCAGCGACGCCGCGTGCGGGATGAAGGCCTTCGGGTTGTAAACCGCTTTTGATTGGGAGCAAGCCTTTTGGGTGAGTGTACCTTCGAATAAGCGCCGGCTAACTACGTGCCAGCAGCCGCGTAATACGTAGGGCGCAAGCAGTTATCCGGAATTATTGGCGTAAAGAGCTTGTAGGCGGTTCTGTCGCGTCTGGTGTGAAAGCCATCGCTTAACGGTGGGTTTTCGCGCCGGGTACGGCGGGCTAGAGTGCAGTAGGGGAGACTGGAATTCTCGGTGTAACGGTGGAAATGTGTAGATATCGGGAAGAACACCAATGGCGAAGGCAGGTCTCTGGGCTGTTACTGACGCTGAGAAGCGAAAGCGTGGGGAGCGAACAGGATTAGATACCCTGTAGTCCACGCCGTAACCGGTGGACGCTGGATGTGGGGCCATTCCACGGGTTCTGTGTTCGGAGCTAACCGGTTAAGGTCCCCTGGGAGTACGGCCGCAAGGCTAAAACCTCAAAGAAATTGACGGGGGCCGCACAAGCGGCGGAGCATGGG</p>                                                                                                                                                                                                                                                                                                                                                                                                                                                                                                                                                                                                                        |

|  |                 |                                                                                                                                                                                                                                                                                                                                                                                                                                                                                                                                                                                                                                                                                                                                                                                                                                                                                                                                                                                                                                                                                                                                                                                                                                                                                                                                                                                                                                                                                                                                                                                                                                                                                                      |
|--|-----------------|------------------------------------------------------------------------------------------------------------------------------------------------------------------------------------------------------------------------------------------------------------------------------------------------------------------------------------------------------------------------------------------------------------------------------------------------------------------------------------------------------------------------------------------------------------------------------------------------------------------------------------------------------------------------------------------------------------------------------------------------------------------------------------------------------------------------------------------------------------------------------------------------------------------------------------------------------------------------------------------------------------------------------------------------------------------------------------------------------------------------------------------------------------------------------------------------------------------------------------------------------------------------------------------------------------------------------------------------------------------------------------------------------------------------------------------------------------------------------------------------------------------------------------------------------------------------------------------------------------------------------------------------------------------------------------------------------|
|  |                 | <p>GGATTAATTCGATGCAACGCGAAGAACCTTACCTGGGCTTGACATGTGCCTGACGACTGCAGAGATGTGGTTTCCTTT<br/> CGGGGCAGGTTACAGGTGGTGCATGGTCGTCGTCAGCTCGTGTCTGAGATGTTGGGTTAAGTCCCAGCAACGAGCGC<br/> AACCCCTCGCCCTGTGTTGCCAGCGGGTTATGCCGGGAACCTCACGGGGGACCGCCGGGGTTAACTCGGAGGAAGGTGG<br/> GGATGACGTCAGATCATCATGCCCTTACGTCCAGGGCTTCACGCATGCTACAATGGCCAGTACAACGGGTTGCTTCA<br/> TGGTGACATGGTGCTAATCCCTTAAAACTGGTCTCAGTTCGGATCGTAGTCTGCAACTCGACTACGTGAAGGCGGAGT<br/> CGCTAGTAATCGCGAATCAGCAACGTCGCGGTGAATGCGTTCGCCGGCCTTGTACACACCGCCCGTCAAGTCATGAAA<br/> GTGGGCAGCACCCGAAGCCGGTGGCCTAACCCCTTTGGGATGGAGCCGTCTAAGGTGAGGCTCGTGATTGGGACTAA<br/> GTCGTAACAAGGTAGCCGTACCGGAAGGTGCGGCTGGATCACCTCCTTT</p>                                                                                                                                                                                                                                                                                                                                                                                                                                                                                                                                                                                                                                                                                                                                                                                                                                                                                                                                                                                                                                   |
|  | UGent09.07      | <p>TGGAGGGTTCGATTCTGGCTCAGGATGAACGCTGGCGGGCTGCTTAACACATGCAAGTCGAACGGGATCTGACCAGCT<br/> TGCTGGTTGGTGAGAGTGGCGAACGGGTGAGTAATGCGTGACCAACCTGCCCATGCTCCAGAATAGCTCTTGAAAC<br/> GGTGGTAATGCTGGATGCTCCAACCTGACGCATGTCTTGTGGGAAAGTGTAGTGGCATGGGATGGGGTCGCGTC<br/> CTATCAGCTTGTAGGCGGGTAATGGCCACCTAGGCTTCGACGGGTAGCCGGCCTGAGAGGGCGGACGGCCACATT<br/> GGGACTGAGATACGGCCAGACTCCTACGGGAGGCAGCAGTGGGGAATATTGCGCAATGGGGGAAACCCCTGACGCAG<br/> CGACGCCGCGTGCGGGATGAAGGCCTTCGGGTTGTAAACCGCTTTTGATTGGGAGCAAGCCTTTTGGGTGAGTGTACC<br/> TTTCGAATAAGCGCCGGCTAACTACGTGCCAGCAGCCGCGGTAATACGTAGGGCGCAAGCGTTATCCGGAATTATTGG<br/> GCGTAAAGAGCTTGTAGGCGGTTCTGTCGCGTCTGGTGTGAAAGCCATCGCTTAACGGTGGGTTTTCGCCGGGTACGG<br/> GCGGGCTAGAGTGCAGTAGGGGAGACTGGAATTCTCGGTGTAACGGTGAATGTGTAGATATCGGGAAGAACAACCAA<br/> TGGCGAAGGCAGGTCTCTGGGCTGTTACTGACGCTGAGAAGCGAAAGCGTGGGGAGCGAACAGGATTAGATACCCTG<br/> GTAGTCCACGCCGTAACGGTGGACGCTGGATGTGGGGCCATTCCACGGGTTCTGTGTGCGGAGCTAACGCGTTAAGC<br/> GTCCCGCCTGGGGAGTACGGCCGCAAGGCTAAAACCTCAAAGAAATTGACGGGGGCCGCACAAGCGGCGGAGCATGC<br/> GGATTAATTCGATGCAACGCGAAGAACCTTACCTGGGCTTGACATGTGCCTGACGACTGCAGAGATGTGGTTTCCTTT<br/> CGGGGCAGGTTACAGGTGGTGCATGGTCGTCGTCAGCTCGTGTCTGAGATGTTGGGTTAAGTCCCAGCAACGAGCGC<br/> AACCCCTCGCCCTGTGTTGCCAGCGGGTTATGCCGGGAACCTCACGGGGGACCGCCGGGGTTAACTCGGAGGAAGGTGG<br/> GGATGACGTCAGATCATCATGCCCTTACGTCCAGGGCTTCACGCATGCTACAATGGCCAGTACAACGGGTTGCTTCA<br/> TGGTGACATGGTGCTAATCCCTTAAAACTGGTCTCAGTTCGGATCGTAGTCTGCAACTCGACTACGTGAAGGCGGAGT<br/> CGCTAGTAATCGCGAATCAGCAACGTCGCGGTGAATGCGTTCGCCGGCCTTGTACACACCGCCCGTCAAGTCATGAAA<br/> GTGGGCAGCACCCGAAGCCGGTGGCCTAACCCCTTTGGGATGGAGCCGTCTAAGGTGAGGCTCGTGATTGGGACTAA<br/> GTCGTAACAAGGTAGCCGTACCGGAAGGTGCGGCTGGATCACCTCCTTT</p> |
|  | ATCC14018<br>_2 | <p>TTTCGTGGAGGGTTCGATTCTGGCTCAGGATGAACGCTGGCGGCGTGCTTAACACATGCNAGTCGAACGGGATCTGAC<br/> CAGCTTGCTGGTTGGTGAGAGTGGCGAACGGGTGAGTAATGCGTGACCAACCTGCCCATGCTCCAGAATAGCTCTTG<br/> GAAACGGGTGGTAATGCTGGATGCTCCAACCTGACGCATGTCTTGTGGGAAAGTGTAGTGGCATGGGATGGGGTC<br/> GCGTCCTATCAGCTTGTAGGCGGGTAATGGCCACCTAGGCTTCGACGGGTAGCCGGCCTGAGAGGGCGGACGGCC<br/> ACATTGGGACTGAGATACGGCCAGACTNCTACGGGAGGCAGCAGTGGGGAATATTGCGCAATGGGGGAAACCCCTGA<br/> CGCAGCGACGNCGCGTGCGGGATGAAGGCCTTCGGGTTGTAAACCGCTTTTGATTGGGAGCAAGCCTTTTGGGTGAGT</p>                                                                                                                                                                                                                                                                                                                                                                                                                                                                                                                                                                                                                                                                                                                                                                                                                                                                                                                                                                                                                                                                                                                                                                                    |

|      |            |                                                                                                                                                                                                                                                                                                                                                                                                                                                                                                                                                                                                                                                                                                                                                                                                                                                                                                                                                                                                                                                                                                                                                                                                                                                                                                                                                                                                                                                                                                                                                                                                                                                                                                       |
|------|------------|-------------------------------------------------------------------------------------------------------------------------------------------------------------------------------------------------------------------------------------------------------------------------------------------------------------------------------------------------------------------------------------------------------------------------------------------------------------------------------------------------------------------------------------------------------------------------------------------------------------------------------------------------------------------------------------------------------------------------------------------------------------------------------------------------------------------------------------------------------------------------------------------------------------------------------------------------------------------------------------------------------------------------------------------------------------------------------------------------------------------------------------------------------------------------------------------------------------------------------------------------------------------------------------------------------------------------------------------------------------------------------------------------------------------------------------------------------------------------------------------------------------------------------------------------------------------------------------------------------------------------------------------------------------------------------------------------------|
|      |            | <p>GTACCTTTCGAATAAGCGCCGGCTAACTACGTGCCAGCAGCCGCGGTAATACGTAGGGGCGCAAGCGTTATCCGGAATT<br/> ATTGGGCGTAAAGAGCTTGTAGGCGGTTCTGTCGCGTCTGGTGTGAAAGCCCATCGCTTAAACGGTGGGNTTGCGCCGGG<br/> TACGGGCGGGCTAGAGTGCAGTAGGGGAGACTGGAATTCTCGGTGTAACGGTGGAAATGTGTAGATATCGGGAAGAAC<br/> ACCAATGGCGAAGGCAGGTCTCTGGGCTGTTACTGACGCTGAGAAGCGAAAGCGTGGGGAGCGAACAGGATTAGATA<br/> CCCTGGTAGTCCACGCCGTAAACGGTGGACGCTGGATGTGGGGCCCATTCCACGGGTTCTGTGTCCGAGCTAACCGT<br/> TAAGCGTCCCGCCTGGGGAGTACGGCCGCAAGGCTAAAACCTCAAAGAAATTGACGGGGGCCNGCACAAGCGGCGGA<br/> GCATGCGGATTAATTCGATGNAACGCGAAGAACCTTACCTGGGCTTGACATGTGCCTGACGACTGCAGAGATGTGGTT<br/> TCCNTTCGGGGCAGGTTACAGGTGGTGCATGGTCGTCTGTCAGCTCGTGTCTGTGAGATGTTGGGTTAAGTCCCGCAAC<br/> GAGCGCAACCCTCGCCCTGTGTTGCCAGCGGGTTATGCCGGGAACTCACGGGGGACCGCCGGGGTTACCNCGGAGGA<br/> AGTGGGNATGACGTCAGATCATCATGCCCTTACGTCCAGGGCTTACGCATGCTACAATGGCCAGTACAACGGGTT<br/> GCTTCATGGTGACATGGTGTAAATCCCTTAAAACCTNGTCTCAGTTCGGATCGTAGTCTGCAACTCGACTACGTGAAGG<br/> CGGAGTCGCTAGTAATCGCGAATCAGCAACGTCGCGGTGAATGCGTTCCCGGGCCTTGACACACCGCCCGTCAAGTC<br/> ATGAAAGTGGGCAGCACCCGAAGCCGGTGGCCTAACCTTTTGGGATGGAGCCGTCTAAGGTGAGGCTCGTGATTGG<br/> G</p>                                                                                                                                                                                                                                                                                                                                                                                                                                                                                                                                                               |
| GS02 | UGent21.28 | <p>TGGAGGGTTCGATTCTGGCTCAGGATGAACGCTGGCGGCGTGCTTAACACATGCAAGTCGAACGGGATCCGACCAGCT<br/> TGCTGGTTGGTGAAGTGGCGAACGGGTGAGTAATGCGTGACCAACCTGCCCATGCTCCAGAATAGCTCTTGAAAC<br/> GGGTGGTAATGCTGGATGCTCCAACCTGACGCATGTCTTGTGGGAAAGTGTAGTGGCATGGGATGGGGTTCGCGTC<br/> CTATCAGCTTGTAGGCGGGGTAATGGCCACCTAGGCTTCGACGGGTAGCCGGCCTGAGAGGGCGGACGGCCACATT<br/> GGGACTGAGATACGGCCAGACTCCTACGGGAGGCAGCAGTGGGGAATATTGCGCAATGGGGAAACCCTGACGCAG<br/> CGACGCCGCGTGCGGGATGAAGGCCTTCGGGTTGTAACCGCTTTTGATTGGGAGCAAGCTTTCGGGTGAGTGTACCT<br/> TTCGAATAAGCGCCGGCTAACTACGTGCCAGCAGCCGCGGTAATACGTAGGGGCGCAAGCGTTATCCGGAATTATTGGG<br/> CGTAAAGAGCTTGTAGGCGGTTTCGTGCGCTCTGGTGTGAAAGCCCATCGCTTAAACGGTGGGTTTGCGCCGGGTACGGG<br/> CGGGCTAGAGTGCAGTAGGGGAGACTGGAATTCGGGTGTAACGGTGGAAATGTGTAGATATCGGGAAGAACACCAAT<br/> GGCGAAGGCAGGTCTCTGGGCTGTTACTGACGCTGAGAAGCGAAAGCGTGGGGAGCGAACAGGATTAGATACCCTGG<br/> TAGTCCACGCCGTAAACGGTGGACGCTGGATGTGGGGCCATTCCACGGGTTCTGTGTCCGAGCTAACCGTAAAGCG<br/> TCCCGCCTGGGGAGTACGGCCGCAAGGCTAAAACCTCAAAGAAATTGACGGGGGCCCGCACAAAGCGGCGGAGCATGCG<br/> GATTAATTCGATGCAACGCGAAGAACCTTACCTGGGCTTGACATGTGCCTGTCGACTGCAGAGATGTGGTTTTCCCTTC<br/> GGGGCAGGTTACAGGTGGTGCATGGTCGTCTGTCAGCTCGTGTCTGTGAGATGTTGGGTTAAGTCCCGCAACGAGCGCA<br/> ACCCTCGCCCTGTGTTGCCAGCGGGTTATGCCGGGAACTCACGGGGGACCGCCGGGGTTAACTCGGAGGAAGGTGGG<br/> GATGACGTCAGATCATCATGCCCTTACGTCCAGGGCTTACGCATGCTACAATGGCCGGTACAACGGGATGCGACAT<br/> GGTGACATGGAGCGGATCCCTTAAAACCGGTCTCAGTTCGGATCGTAGTCTGCAACTCGACTACGTGAAGGCGGAGTC<br/> GCTAGTAATCGCGAATCAGCAACGTCGCGGTGAATGCGTTCCCGGGCCTTGACACACCGCCCGTCAAGTCATGAAAG<br/> TGGGCAGCACCCGAAGCCGGTGGCCTAACCTTTTGGGATGGAGCCGTCTAAGGTGAGGCTCGTGATTGGGACTAAGT<br/> CGTAAACAAGGTAGCCGTACCGGAAGGTGCGGCTGGATCACCTCCTTT</p> |

|      |           |                                                                                                                                                                                                                                                                                                                                                                                                                                                                                                                                                                                                                                                                                                                                                                                                                                                                                                                                                                                                                                                                                                                                                                                                                                                                                                                                                                                                                                                                                                                                                                                                                                                                                                             |
|------|-----------|-------------------------------------------------------------------------------------------------------------------------------------------------------------------------------------------------------------------------------------------------------------------------------------------------------------------------------------------------------------------------------------------------------------------------------------------------------------------------------------------------------------------------------------------------------------------------------------------------------------------------------------------------------------------------------------------------------------------------------------------------------------------------------------------------------------------------------------------------------------------------------------------------------------------------------------------------------------------------------------------------------------------------------------------------------------------------------------------------------------------------------------------------------------------------------------------------------------------------------------------------------------------------------------------------------------------------------------------------------------------------------------------------------------------------------------------------------------------------------------------------------------------------------------------------------------------------------------------------------------------------------------------------------------------------------------------------------------|
|      | UGent1801 | <p>GTGAGTGTACCTTTCGAATAAGCGCCGGCTAACTACGTGCCAGCAGCCGCGGTAATACGTAGGGCGCAAGCGTTATCC<br/> GGAATTATTGGGCGTAAAGAGCTTGTAGGCCGTTTCGTTCGCGTCTGGTGTGAAAGCCCATCGCTTAACGGTGGGTTTGC<br/> GCCGGGTACGGGCGGGCTAGAGTGCAGTAGGGGAGACTGGAATTCCTGGTGTAAACGGTGGAAATGTGTAGATATCGGG<br/> AAGAACACCAATGGCGAAGGCAGGTCTCTGGGCTGTTACTGACGCTGAGAAGCGAAAGCGTGGGGAGCGAACAGGA<br/> TTAGATACCCTGGTAGTCCACGCCGTAACGGTGGACGCTGGATGTGGGGCCCATTCCACGGGTTCTGTGTTCGGAGCT<br/> AACGCGTTAAGCGTCCCGCTGGGGAGTACGGCCGCAAGGCTAAAACCTCAAAGAAATTGACGGGGGCCCCGCACAAGC<br/> GGCGGAGCATGCGGATTAATTCGATGCAACGCGAAGAACCTTACCTGGGCTTGACATGTGCCTGTCGACTGCAGAGAT<br/> GTGGTTTCCCTTCGGGGCAGGTTACAGGTGGTGCATGGTCGTCGTCAGCTCGTGTGTCGTGAGATGTTGGGTAAAGTCCC<br/> GCAACGAGCGCAACCCTCGCCCTGTGTTGCCAGCGGGTTATGCCGGGAACTCACGGGGGACCGCCGGGGTTAACTCG<br/> GAGGAAGGTGGGGATGACGTCAGATCATCATGCCCTTACGTCCAGGGCTTCACGCATGCTACAATGGCCGGTACAAC<br/> GGGATGCGACATGTTGACATGGAGCGGATCCCTTAAACCGGTCTCAGTTCGGATCGTAGTCTGCAACTCGACTACGT<br/> GAAGGCGGAGTCGCTAGTAATCGCGAATCAGCAACGTCGCGGTGAATGCGTTCCCGGGCCTTGACACACCGCCCGTC<br/> AAGTCATGAAAGTGGGCAGCACCCGAAGCCGGTGGCCTAACCTTTTTGGGATGGAGCCGTCTAAGGTGAGGCTCGTG<br/> ATTGGGACTAAGTCGTAACAAGGTAGCCGTACCGGAAGGTGCGGCTGGATCACCTCCTT</p>                                                                                                                                                                                                                                                                                                                                                                                                                                                                                                        |
| GS03 | GS9838    | <p>TGGAGGGTTCGATTCTGGCTCAGGATGAACGCTGGCGGCGTGCTTAACACATGCAAGTCGAACGGGATCTAGTCAGCT<br/> TGCTGACTGGTGTAGAGTGGCGAACGGGTGAGTAATGCGTGACCAACCTGCCCATGCTCCAGAATAGCTCTTGAAAC<br/> GGGTGGTAATGCTGGATGCTCCAACCTGACGCATGTCTTGTGGGAAAGTGTTTAGTGGCATGGGATGGGGTTCGCGTC<br/> CTATCAGCTTGTAGGCGGGGTAATGGCCACCTAGGCTTCGACGGGTAGCCGGCCTGAGAGGGCGGACGGCCACATT<br/> GGGACTGAGATACGGCCCAGACTCCTACGGGAGGCAGCAGTGGGGAATATTGCGCAATGGGGGAAACCCTGACGCAG<br/> CGACGCCGCGTGCGGGATGAAGGCCTTCGGGTTGTAACCGCTTTTGATTGGGAGCAAGCCTTCGGGTGAGTGTACCT<br/> TTCGAATAAGCGCCGGCTAACTACGTGCCAGCAGCCGCGGTAATACGTAGGGCGCAAGCGTTATCCGGAATTATTGGG<br/> CGTAAAGAGCTTGTAGGCGGTTTCGTTCGCGTCTGGTGTGAAAGCCCATCGCTTAACGGTGGGTCTGCGCCGGGTACGGG<br/> CGGGCTAGAGTGCAGTAGGGGAGACTGGAATTCCTGGTGTAAACGGTGGAAATGTGTAGATATCGGGAAGAACACCAAT<br/> GGCGAAGGCAGGTCTCTGGGCTGTTACTGACGCTGAGAAGCGAAAGCGTGGGGAGCGAACAGGATTAGATACCCTGG<br/> TAGTCCACGCCGTAAACGGTGGACGCTGGATGTGGGGCCCATTCCACGGGTTCCGTGTCGGAGCTAACCGTTAAGCG<br/> TCCCGCCTGGGGAGTACGGCCGCAAGGCTAAAACCTCAAAGAAATTGACGGGGGCCCCGCACAAGCGGCGGAGCATGCG<br/> GATTAATTCGATGCAACGCGAAGAACCTTACCTGGGCTTGACATGTGCCTGTCGACTGCAGAGATGTGGTTTCCCTTC<br/> GGGGCAGGTTACAGGTGGTGCATGGTCGTCGTCAGCTCGTGTGTCGTGAGATGTTGGGTAAAGTCCCGCAACGAGCGCA<br/> ACCCTCGCCCTGTGTTGCCAGCGGGTTATGCCGGGAACTCACGGGGGACCGCCGGGGTTAACTCGGAGGAAGGTGGG<br/> GATGACGTCAGATCATCATGCCCTTACGTCCAGGGCTTCACGCATGCTACAATGGCCGGTACAACGGGATGCGACAT<br/> GGTGACATGGAGCGGATCCCTTAAACCGGTCTCAGTTCGGATCGTAGTCTGCAACTCGACTACGTGAAGGCGGAGTC<br/> GCTAGTAATCGCGAATCAGCAACGTCGCGGTGAATGCGTTCCCGGGCCTTGACACACCGCCCGTCAAGTCATGAAAG<br/> TGGGCAGCACCCGAAGCCGGTGGCCTAACCTTTTTGGGATGGAGCCGTCTAAGGTGAGGCTCGTGATTGGGACTAAGT<br/> CGTAACAAGGTAGCCGTACCGGAAGGTGCGGCTGGATCACCTCCTT</p> |

|  |            |                                                                                                                                                                                                                                                                                                                                                                                                                                                                                                                                                                                                                                                                                                                                                                                                                                                                                                                                                                                                                                                                                                                                                                                                                                                                                                                                                                                                                                                                                                                                                                                                                                                                                               |
|--|------------|-----------------------------------------------------------------------------------------------------------------------------------------------------------------------------------------------------------------------------------------------------------------------------------------------------------------------------------------------------------------------------------------------------------------------------------------------------------------------------------------------------------------------------------------------------------------------------------------------------------------------------------------------------------------------------------------------------------------------------------------------------------------------------------------------------------------------------------------------------------------------------------------------------------------------------------------------------------------------------------------------------------------------------------------------------------------------------------------------------------------------------------------------------------------------------------------------------------------------------------------------------------------------------------------------------------------------------------------------------------------------------------------------------------------------------------------------------------------------------------------------------------------------------------------------------------------------------------------------------------------------------------------------------------------------------------------------|
|  | UGent06.41 | <p>TGGAGGGTTCGATTCTGGCTCAGGATGAACGCTGGCGGGCGTGCTTAACACATGCAAGTCGAACGGGATCTAGTCAGCT<br/> TGCTGACTGGTGAGAGTGGCGAACGGGTGAGTAATGCGTGACCAACCTGCCCATGCTCCAGAATAGCTCTTGAAAC<br/> GGTGGTAATGCTGGATGCTCCAACCTGACGCATGTCTTGTGGGAAAGTGTTAGTGGCATGGGATGGGGTCGCGTC<br/> CTATCAGCTTGTAGGCGGGTAATGGCCACCTAGGCTTCGACGGGTAGCCGGCCTGAGAGGGCGGACGGCCACATT<br/> GGGACTGAGATACGGCCCAGACTCCTACGGGAGGCAGCAGTGGGGAATATTGCGCAATGGGGGAAACCCTGACGCAG<br/> CGACGCCGCGTGCGGGATGAAGGCCTTCGGGTTGTAAACCGCTTTTGATTGGGAGCAAGCCTTTTGGGTGAGTGTACC<br/> TTTCGAATAAGCGCCGGCTAACTACGTGCCAGCAGCCGCGGTAATACGTAGGGCGCAAGCGTTATCCGGAATTATTGG<br/> GCGTAAAGAGCTTGTAGGCGGTTTCGTCGCGTCTGGTGTGAAAGCCCATCGCTTAACGGTGGGTCTGCGCCGGGTACGG<br/> GCGGGCTAGAGTGCAGTAGGGGAGACTGGAATTCCCAGTGTAAACGGTGGAAATGTGTAGATATCGGGAAGAACACCAA<br/> TGGCGAAGGCAGGTCTCTGGGCTGTTACTGACGCTGAGAAGCGAAAGCGTGGGAGCGAACAGGATTAGATACCCTG<br/> GTAGTCCACGCCGTAACGGTGGACGCTGGATGTGGGGCCATTCCACGGGTTCCGTGTGCGAGCTAACCGGTTAAGC<br/> GTCCCGCCTGGGGAGTACGGCCGCAAGGCTAAAACCTCAAAGAAATTGACGGGGGCCCGCACAAAGCGGCGGAGCATGC<br/> GGATTAATTCGATGCAACGCGAAGAACCTTACCTGGGCTTGACATGTGCCTGTCGACTGCAGAGATGTGGTTCCCTT<br/> CGGGCAGGTTACAGGTGGTGCATGGTCGTCGTCAGCTCGTGTGAGATGTTGGGTTAAGTCCCGCAACGAGCGC<br/> AACCTCGCCCTGTGTTGCCAGCGGGTTATGCCGGAACTCACGGGGACC CGCGGGGTTAACTCGGAGGAAGGTGG<br/> GGATGACGTCAGATCATCATGCCCTTACGTCCAGGGCTTCACGCATGCTACAATGGCCGGTACAACGGGATGCGACA<br/> TGGTGACATGGAGCGGATCCCTTAAACCGGTCTCAGTTCGGATCGTAGTCTGCAACTCGACTACGTGAAGGCGGAGT<br/> CGCTAGTAATCGGAATCAGCAACGTCGCGGTGAATGCGTTCCCGGGCCTTGTACACACCGCCCGTCAAGTCATGAAA<br/> GTGGGCAGCACCCGAAGCCGGTGGCCTAACCTTTTGGGATGGAGCCGTCTAAGGTGAGGCTCGTGATTGGGACTAA<br/> GTCGTAACAAGGTAGCCGTACCGGAAGGTGCGGCTGGATCACCTCCTTT</p> |
|  | UGent09.48 | <p>TGGAGGGTTCGATTCTGGCTCAGGATGAACGCTGGCGGGCGTGCTTAACACATGCAAGTCGAACGGGATCTAGTCAGCT<br/> TGCTGACTGGTGAGAGTGGCGAACGGGTGAGTAATGCGTGACCAACCTGCCCATGCTCCAGAATAGCTCTTGAAAC<br/> GGTGGTAATGCTGGATGCTCCAACCTGACGCATGTCTTGTGGGAAAGTGTTAGTGGCATGGGATGGGGTCGCGTC<br/> CTATCAGCTTGTAGGCGGGTAATGGCCACCTAGGCTTCGACGGGTAGCCGGCCTGAGAGGGCGGACGGCCACATT<br/> GGGACTGAGATACGGCCCAGACTCCTACGGGAGGCAGCAGTGGGGAATATTGCGCAATGGGGGAAACCCTGACGCAG<br/> CGACGCCGCGTGCGGGATGAAGGCCTTCGGGTTGTAAACCGCTTTTGATTGGGAGCAAGCCTTCGGGTGAGTGTACCT<br/> TTCGAATAAGCGCCGGCTAACTACGTGCCAGCAGCCGCGGTAATACGTAGGGCGCAAGCGTTATCCGGAATTATTGGG<br/> CGTAAAGAGCTTGTAGGCGGTTTCGTCGCGTCTGGTGTGAAAGCCCATCGCTTAACGGTGGGTCTGCGCCGGGTACGGG<br/> CGGGCTAGAGTGCAGTAGGGGAGACTGGAATTCCCAGTGTAAACGGTGGAAATGTGTAGATATCGGGAAGAACACCAAT<br/> GGCGAAGGCAGGTCTCTGGGCTGTTACTGACGCTGAGAAGCGAAAGCGTGGGAGCGAACAGGATTAGATACCCTGG<br/> TAGTCCACGCCGTAACGGTGGACGCTGGATGTGGGGCCATTCCACGGGTTCCGTGTGCGAGCTAACCGGTTAAGCG<br/> TCCCGCCTGGGGAGTACGGCCGCAAGGCTAAAACCTCAAAGAAATTGACGGGGGCCCGCACAAAGCGGCGGAGCATGCG<br/> GATTAATTCGATGCAACGCGAAGAACCTTACCTGGGCTTGACATGTGCCTGTCGACTGCAGAGATGTGGTTTCCCTTC<br/> GGGCGAGGTTACAGGTGGTGCATGGTCGTCGTCAGCTCGTGTGAGATGTTGGGTTAAGTCCCGCAACGAGCGCA</p>                                                                                                                                                                                                                                                                                                                                                                                                                                                                                  |



|      |         |                                                                                                                                                                                                                                                                                                                                                                                                                                                                                                                                                                                                                                                                                                                                                                                                                                                                                                                                                                                                                                                                                                                                                                                                                                                                                                                                                                                                                                                                                                                                                                           |
|------|---------|---------------------------------------------------------------------------------------------------------------------------------------------------------------------------------------------------------------------------------------------------------------------------------------------------------------------------------------------------------------------------------------------------------------------------------------------------------------------------------------------------------------------------------------------------------------------------------------------------------------------------------------------------------------------------------------------------------------------------------------------------------------------------------------------------------------------------------------------------------------------------------------------------------------------------------------------------------------------------------------------------------------------------------------------------------------------------------------------------------------------------------------------------------------------------------------------------------------------------------------------------------------------------------------------------------------------------------------------------------------------------------------------------------------------------------------------------------------------------------------------------------------------------------------------------------------------------|
|      |         | <p>ACCCTCGCCCTGTGTTGCCAGCGGGTTATGCCGGGAACTCACGGGGGACCGCCGGGGTTAACTCGGAGGAAGGTGGG<br/> GATGACGTCAGATCATCATGCCCTTACGTCCAGGGCTTACGCATGCTACAATGGCCGGTACAACGGGATGCGACAT<br/> GGTGACATGGAGCGGATCCCTTAAAACCGGTCTCAGTTCGGATCGTAGTCTGCAACTCGACTACGTGAAGGCGGAGTC<br/> GCTAGTAATCGCGAATCAGCAACGTTCGCGGTGAATGCGTTCCCGGGCCTTGTACACACCGCCCGTCAAGTCATGAAAG<br/> TGGGCAGCACCCGAAGCCGGTGGCCTAACCTTTTGGGATGGAGCCGTCTAAGGTGAGGCTCGTGATTGGGACTAAGT<br/> CGTAAACAAGGTAGCCGTACCGGAAGGTGCGGCTGGATCACCTCCTT</p>                                                                                                                                                                                                                                                                                                                                                                                                                                                                                                                                                                                                                                                                                                                                                                                                                                                                                                                                                                                                                                                                                   |
| GS04 | JCP8481 | <p>ATGCAAGTCGAACGGGATCCGACCAGCTTGCTGGTTGGTGAGAGTGGCGAACGGGTGAGTAATGCGTGACCAACCTG<br/> CCCCATGCTCCAGAATAGCTCTTGGAAACGGGTGGTAATGCTGGATGCTCCAACCTGACGCATGTCTTGTGGGAAAG<br/> TGTTTAGTGGCATGGGATGGGGTCGCGTCTATCAGCTTGTAGGCGGGGTAATGGCCACCTAGGCTTCGACGGGTAG<br/> CCGGCCTGAGAGGGCGGACGGCCACATTGGGACTGAGATACGGCCCAGACTCCTACGGGAGGCAGCAGTGGGGAATA<br/> TTGCGCAATGGGGGAAACCCTGACGCAGCGACGCCGCGTTCGGGATGAAGGCCTTCGGGTTGTAAACCGCTTTTATT<br/> GGGAGCAAGCTTTCGGGTGAGTGTACCTTTCGAATAAGCGCCGGTAACTACGTGCCAGCAGCCGCGGTAATACGTAG<br/> GGCGAAGCGTTATCCGGAATTATTGGGCGTAAAGAGCTTGTAGGCGGTTTCGTTCGCGTCTGGTGTGAAAGCCCATCGC<br/> TTAACGGTGGGTTTTCGCGGGGTACGGGCGGGCTAGAGTGCAGTAGGGGAGACTGGAATTCCCGGTGTAACGGTGGG<br/> ATGTGTAGATATCGGGAAGAACACCAATGGCGAAGGCAGGTCTCTGGGCTGTTACTGACGCTGAGAAGCGAAAGCGT<br/> GGGAGCGAACAGGATTAGATACCCTGGTAGTCCACGCCGTAAACGGTGGACGCTGGATGTGGGGCCCATTCCACGG<br/> GTTCTGTGTTCGGAGCTAACGCGTTAAGCGTCCCGCCTGGGGAGTACGGCCGCAAGGCTAAACTCAAAGAAATTGAC<br/> GGGGCCCCGCACAAGCGGCGGAGCATGCGGATTAATTCGATGCAACGCGAAGAACCCTTACCTGGGCTTGACATGTGC<br/> CTGTGACTGCAGAGATGTGGTTTCCCTTCGGGGCAGGTTACAGGTGGTGCATGGTTCGTCGTCAGCTCGTGTGCTGA<br/> GATGTTGGGTAAAGTCCCACAACGAGCGCAACCCTCGCCCTGTGTTGCCAGCGGGTATGCCGGGAACTCACGGGGGA<br/> CCGCCGGGTAACTCGGAGGAAGGTGGGGATGACGTCAGATCATCATGCCCTTACGTCCAGGGCTTCACGCATGCT<br/> ACAATGGCCGGTACAACGGGATGCGACATGGTGACATGGAGCGGATCCCTTAAAACCGGTCTCAGTTCGGATCGTAG<br/> TCTGCAACTCGACTACGTGAAGGCGGAGTCGCTAGTAATCGCGAATCAGCAACGTTCGCGGTGAATGCGTTCCCGGGCC<br/> TTGTACACACCGCCCGTCAAGTCATGAAAGTGGGCAGCACCCGAAGCCGGTGGCCTAACCTTTTGGGATGGAGCCGT<br/> CTAAGGTGAGG</p> |
| GS05 | UMB1686 | <p>TGGAGGGTTCGATTCTGGCTCAGGATGAACGCTGGCGGCGTGCTTAACACATGCAAGTCGAACGGGATCTAGTCAGCT<br/> TGCTGACTGGTGAGAGTGGCGAACGGGTGAGTAATGCGTGACCAACCTGCCCATGCTCCAGAATAGCTCTTGGAAAC<br/> GGGTGGTAATGCTGGATGCTCCAACCTGACGCATGTCTTGTGGGAAAGTGTTTAGTGGCATGGGATGGGGTCGCGTC<br/> CTATCAGCTTGTAGGCGGGGTAATGGCCACCTAGGCTTCGACGGGTAGCCGGCCTGAGAGGGCGGACGGCCACATT<br/> GGGACTGAGATACGGCCCAGACTCCTACGGGAGGCAGCAGTGGGGAATATTGCGCAATGGGGGAAACCCTGACGCAG<br/> CGACGCCGCGTTCGGGATGAAGGCCTTCGGGTTGTAAACCGCTTTTATTGGGAGCAAGCCTTCGGGTGAGTGTACCT<br/> TTCGAATAAGCGCCGGTAACTACGTGCCAGCAGCCGCGGTAATACGTAGGGCGCAAGCGTTATCCGGAATTATTGGG<br/> CGTAAAGAGCTTGTAGGCGGTTTCGTTCGCGTCTGGTGTGAAAGCCCATCGCTTAAACGGTGGGTCTGCGCCGGGTACGGG<br/> CGGGCTAGAGTGCAGTAGGGGAGACTGGAATTCCCGGTGTAACGGTGGAAATGTGTAGATATCGGGAAGAACACCAAT</p>                                                                                                                                                                                                                                                                                                                                                                                                                                                                                                                                                                                                                                                                                                                                                                                         |

|      |          |                                                                                                                                                                                                                                                                                                                                                                                                                                                                                                                                                                                                                                                                                                                                                                                                                                                                                                                                                                                                                                                                                                                                                                                                                                                                                                                                                                                                                                                                                                                                                                                                |
|------|----------|------------------------------------------------------------------------------------------------------------------------------------------------------------------------------------------------------------------------------------------------------------------------------------------------------------------------------------------------------------------------------------------------------------------------------------------------------------------------------------------------------------------------------------------------------------------------------------------------------------------------------------------------------------------------------------------------------------------------------------------------------------------------------------------------------------------------------------------------------------------------------------------------------------------------------------------------------------------------------------------------------------------------------------------------------------------------------------------------------------------------------------------------------------------------------------------------------------------------------------------------------------------------------------------------------------------------------------------------------------------------------------------------------------------------------------------------------------------------------------------------------------------------------------------------------------------------------------------------|
|      |          | GGCGAAGGCAGGTCTCTGGGCTGTTACTGACGCTGAGAAGCGAAAGCGTGGGGAGCGAACAGGATTAGATACCCTGG TAGTCCACGCCGTAAACGGTGGACGCTGGATGTGGGGCCCATTCCACGGGTTCGGTGTGGAGCTAACGCGTAAAGCG TCCCGCCTGGGGAGTACGGCCGCAAGGCTAAAACTCAAAGAAATTGACGGGGGGCCCGCACAAAGCGGCGGAGCATGCG GATTAATTCGATGCAACGCGAAGAACCTTACCTGGGCTTGACATGTGCCTGACAGCTGCAGAGATGTGGTTTTCCCTTC GGGGCAGGTTACAGGTGGTGCATGGTCGTCGTCAGCTCGTGTGAGATGTTGGGTTAAGTCCCGCAACGAGCGCA ACCCTCGCCCTGTGTTGCCAGCGGGTATGCCGGGAACTCACGGGGGACCGCCGGGGTTAACTCGGAGGAAGGTGGG GATGACGTCAGATCATCATGCCCTTACGTCCAGGGCTTACGCATGCTACAATGGCCGGTACAACGGGATGCGACAT GGTGACATGGAGCGGATCCCTTAAAACCGGTCTCAGTTCGGATCGTAGTCTGCAACTCGACTACGTGAAGGCGGAGTC GCTAGTAATCGCGAATCAGCAACGTCGCGGTGAATGCGTTCCCGGGCCTTGTACACACCGCCCGTCAAGTCATGAAAG TGGGCAGCACCCGAAGCCGGTGGCCTAACCTTTTGGGATGGAGCCGTCTAAGGTGAGGCTCGTGATTGGGACTAAGT CGTAACAAGGTAGCCGTACCGGAAGGTGCGGCTGGATCACCTCCTTT                                                                                                                                                                                                                                                                                                                                                                                                                                                                                                                                                                                                                                                                                                                                   |
|      | 6119V5   | TGGAGGGTTCGATTCTGGCTCAGGATGAACGCTGGCGGCGTGCTTAACACATGCAAGTCGAACGGGATCTAGTCAGCT TGCTGACTGGTGAGAGTGGCGAACGGGTGAGTAATGCGTGACCAACCTGCCCATGCTCCAGAATAGCTCTTGAAAC GGGTGGTAATGCTGGATGCTCCAACCTTGACGCATGTCTTGTTGGGAAAGTGTTTAGTGGCATGGGATGGGGTTCGCGTC CTATCAGCTTGTAGGCGGGGTAATGGCCACCTAGGCTTCGACGGGTAGCCGGCCTGAGAGGGCGGACGGCCACATT GGGACTGAGATACGGCCAGACTCCTACGGGAGGCAGCAGTGGGGAATATTGCGCAATGGGGGAAACCTGACGCAG CGACGCCGCGTGCGGGATGAAGGCCTTCGGGTTGTAACCGCTTTTGATTGGGAGCAAGCTTTCGGGTGAGTGTACCT TTCGAATAAGCGCCGGCTAACTACGTGCCAGCAGCCGCGTAATACGTAGGGCGCAAGCGTTATCCGGAATTATTGGG CGTAAAGAGCTTGTAGGCGGTTTCGTCGCGTCTGGTGTGAAAGCCCATCGCTTAACGGTGGGTCTGCGCCGGGTACGGG CGGGCTAGAGTGCAGTAGGGGAGACTGGAATTCCCGGTGTAAACGGTGGAAATGTGTAGATATCGGGAAGAACACCAAT GGCGAAGGCAGGTCTCTGGGCTGTTACTGACGCTGAGAAGCGAAAGCGTGGGGAGCGAACAGGATTAGATACCCTGG TAGTCCACGCCGTAAACGGTGGACGCTGGATGTGGGGCCCATTCCACGGGTTCGGTGTGGAGCTAACGCGTAAAGCG TCCCGCCTGGGGAGTACGGCCGCAAGGCTAAAACTCAAAGAAATTGACGGGGGGCCCGCACAAAGCGGCGGAGCATGCG GATTAATTCGATGCAACGCGAAGAACCTTACCTGGGCTTGACATGTGCCTGACAGCTGCAGAGATGTGGTTTTCCCTTC GGGGCAGGTTACAGGTGGTGCATGGTCGTCGTCAGCTCGTGTGAGATGTTGGGTTAAGTCCCGCAACGAGCGCA ACCCTCGCCCTGTGTTGCCAGCGGGTATGCCGGGAACTCACGGGGGACCGCCGGGGTTAACTCGGAGGAAGGTGGG GATGACGTCAGATCATCATGCCCTTACGTCCAGGGCTTACGCATGCTACAATGGCCGGTACAACGGGATGCGACAT GGTGACATGGAGCGGATCCCTTAAAACCGGTCTCAGTTCGGATCGTAGTCTGCAACTCGACTACGTGAAGGCGGAGTC GCTAGTAATCGCGAATCAGCAACGTCGCGGTGAATGCGTTCCCGGGCCTTGTACACACCGCCCGTCAAGTCATGAAAG TGGGCAGCACCCGAAGCCGGTGGCCTAACCTTTTGGGATGGAGCCGTCTAAGGTGAGGCTCGTGATTGGGACTAAGT CGTAACAAGGTAGCCGTACCGGAAGGTGCGGCTGGATCACCTCCTTT |
| GS06 | GED7760B | TGGAGGGTTCGATTCTGGCTCAGGATGAACGCTGGCGGCGTGCTTAACACATGCAAGTCGAACGGGATCCGACCAGCT TGCTGGTTGGTGAGAGTGGCGAACGGGTGAGTAATGCGTGACCAACCTGCCCATGCTCCAGAATAGCTCTTGAAAC GGGTGGTAATGCTGGATGCTCCAACCTTGACGCATGTCTTGTTGGGAAAGTGTTTAGTGGCATGGGATGGGGTTCGCGTC                                                                                                                                                                                                                                                                                                                                                                                                                                                                                                                                                                                                                                                                                                                                                                                                                                                                                                                                                                                                                                                                                                                                                                                                                                                                                                                                                   |

|      |          |                                                                                                                                                                                                                                                                                                                                                                                                                                                                                                                                                                                                                                                                                                                                                                                                                                                                                                                                                                                                                                                                                                                                                                                                                                                                                                                                                                                                                                                                                  |
|------|----------|----------------------------------------------------------------------------------------------------------------------------------------------------------------------------------------------------------------------------------------------------------------------------------------------------------------------------------------------------------------------------------------------------------------------------------------------------------------------------------------------------------------------------------------------------------------------------------------------------------------------------------------------------------------------------------------------------------------------------------------------------------------------------------------------------------------------------------------------------------------------------------------------------------------------------------------------------------------------------------------------------------------------------------------------------------------------------------------------------------------------------------------------------------------------------------------------------------------------------------------------------------------------------------------------------------------------------------------------------------------------------------------------------------------------------------------------------------------------------------|
|      |          | <p>CTATCAGCTTGTAGGCGGGGTAATGGCCACCTAGGCTTCGACGGGTAGCCGGCCTGAGAGGGCGGACGGCCACATT<br/> GGGACTGAGATACGGCCCAGACTCCTACGGGAGGCAGCAGTGGGGAATATTGCGCAATGGGGGAAACCCTGACGCAG<br/> CGACGCCGCGTGCGGGATGAAGGCCTTCGGGTTGTAAACCGCTTTTGATTGGGAGCAAGCTTTCGGGTGAGTGTACCT<br/> TTCGAATAAGCGCCGGCTAACTACGTGCCAGCAGCCGCGGTAATACGTAGGGCGCAAGCGTTATCCGGAATTATTGGG<br/> CGTAAAGAGCTTGTAGGCGGTTTCGTCGCGTCTGGTGTGAAAGCCCATCGCTTAACGGTGGGTTTTCGCGCCGGGTACGGG<br/> CGGGCTAGAGTGCAGTAGGGGAGACTGGAATTCGCGGTGTAACGGTGGAAATGTGTAGATATCGGGAAGAACACCAAT<br/> GGCGAAGGCAGGTCTCTGGGCTGTTACTGACGCTGAGAAGCGAAAGCGTGGGGAGCGAACAGGATTAGATACCCTGG<br/> TAGTCCACGCCGTAAACGGTGGACGCTGGATGTGGGGCCATTCCACGGGTTCTGTGTCTGGAGCTAACGCGTTAAGCG<br/> TCCCGCCTGGGGAGTACGGCCGCAAGGCTAAACTCAAAGAAATTGACGGGGGCCCGCACAAAGCGGCGGAGCATGCG<br/> GATTAATTCGATGCAACCGGAAGAACCTTACCTGGGCTTGACATGTGCCTGACGACTGCAGAGATGTGGTTTCCCTTC<br/> GGGGCAGGTTACAGGTGGTGCATGGTCGTCGTCAGCTCGTGTCTGTGAGATGTTGGGTTAAGTCCCGCAACGAGCGCA<br/> ACCCTCGCCCTGTGTTGCCAGCGGGTTATGCCGGGAACTCACGGGGGACCGCCGGGGTTAACTCGGAGGAAGGTGGG<br/> GATGACGTCAGATCATCATGCCCTTACGTCCAGGGCTTCACGCATGCTACAATGGCCGGTACAACGGGATGCGACAT<br/> GGTGACATGGAGCGGATCCCTTAAAACCGGTCTCAGTTCGGATCGTAGTCTGCAACTCGACTACGTGAAGGCGGAGTC<br/> GCTAGTAATCGGAATCAGCAACGTTCGCGGTGAATGCGTTCCCGGGCCTTGTACACACCGCCCGTCAAGTCATGAAAG<br/> TGGGCAGCACCCGAAGCCGGTGGCCTAACCTTTTGGGATGGAGCCGTCTAAGGTGAGGCTCGTGATTGGGACTAAGT<br/> CGTAAACAAGGTAGCCGTACCGGAAGGTGCGGCTGGATCACCTCCTTT</p>                               |
| GS07 | CMW7778B | <p>TGGAGGGTTCGATTCTGGCTCAGGATGAACGCTGGCGGCGTGCTTAACACATGCAAGTCGAACGGGATCTGACCAGCT<br/> TGCTGGTTGGTGTAGAGTGGCGAACGGGTGAGTAATGCGTGACCAACCTACCCTATGCTCCAGAATAGCTCCTGGAAAC<br/> GGGTGGTAATGCTGGATGCTCCAACCTGACGCATGTTTTGTTGGGAAAGTGTTTAGCGGCATGGGATGGGGTTCGCGTC<br/> CTATCAGCTTGTAGGCGGGGTAATGGCCACCTAGGCTTCGACGGGTAGCCGGCCTGAGAGGGCGGACGGCCACATT<br/> GGGACTGAGATACGGCCCAGACTCCTACGGGAGGCAGCAGTGGGGAATATTGCGCAATGGGGGAAACCCTGACGCAG<br/> CGACGCCGCGTGCGGGATGAAGGCCTTCGGGTTGTAAACCGCTTTTGATTGGGAGCAAGCCTTCGGGTGAGTGTACCT<br/> TTCGAATAAGCGCCGGCTAACTACGTGCCAGCAGCCGCGGTAATACGTAGGGCGCAAGCGTTATCCGGATTTATTGGG<br/> CGTAAAGAGCTTGTAGGCGGTTTCGTCGCGTCTGGTGTGAAAGCCCATCGCTTAACGGTGGGTCTGCGCCGGGTACGGG<br/> CGGGCTAGAGTGCAGTAGGGGAAACTGGAATTCGCGGTGTAACGGTGGAAATGTGTAGATATCGGGAAGAACACCAAT<br/> GGCGAAGGCAGGTTTCTGGGCTGTTACTGACGCTGAGAAGCGAAAGCGTGGGGAGCGAACAGGATTAGATACCCTGG<br/> TAGTCCACGCCGTAAACGGTGGACGCTGGATGTGGGGCCATTCCACGGGTTCCGTGTCTGGAGCTAACGCGTTAAGCG<br/> TCCCGCCTGGGGAGTACGGCCGCAAGGCTAAACTCAAAGAAATTGACGGGGGCCCGCACAAAGCGGCGGAGCATGCG<br/> GATTAATTCGATGCAACCGGAAGAACCTTACCTGGGCTTGACATGTGCCTGATGACTGCAGAGATGTGGTTTCCCTTC<br/> GGGGCAGGTTACAGGTGGTGCATGGTCGTCGTCAGCTCGTGTCTGTGAGATGTTGGGTTAAGTCCCGCAACGAGCGCA<br/> ACCCTCGCCCTGTGTTGCCAGCGGGTTATGCCGGGAACTCACGGGGGACCGCCGGGGTTAACTCGGAGGAAGGTGGG<br/> GATGACGTCAGATCATCATGCCCTTACGTCCAGGGCTTCACGCATGCTACAATGGCCGGTACAACGGGGTGCACAT<br/> GGTGACATGGAGCTAATCCCTTAAAACCGGTCTCAGTTCGGATCGTAGTCTGCAACTCGACTACGTGAAGGCGGAGTC</p> |

|      |        |                                                                                                                                                                                                                                                                                                                                                                                                                                                                                                                                                                                                                                                                                                                                                                                                                                                                                                                                                                                                                                                                                                                                                                                                                                                                                                                                                                                                                                                                                                                                                                                                                                                                  |
|------|--------|------------------------------------------------------------------------------------------------------------------------------------------------------------------------------------------------------------------------------------------------------------------------------------------------------------------------------------------------------------------------------------------------------------------------------------------------------------------------------------------------------------------------------------------------------------------------------------------------------------------------------------------------------------------------------------------------------------------------------------------------------------------------------------------------------------------------------------------------------------------------------------------------------------------------------------------------------------------------------------------------------------------------------------------------------------------------------------------------------------------------------------------------------------------------------------------------------------------------------------------------------------------------------------------------------------------------------------------------------------------------------------------------------------------------------------------------------------------------------------------------------------------------------------------------------------------------------------------------------------------------------------------------------------------|
|      |        | GCTAGTAATCGCGAATCAGCAACGTCGCGGTGAATGCGTTCCCGGGCCTTGTACACACCGCCCGTCAAGTCATGAAAAG<br>TGGGCAGCACCCGAAGCCGGTGGCCTGACCTTTTTGGAGGGAGCCGTCTAAGGTGAGGCTCGTGATTGGGACTAAGTC<br>GTAACAAGGTAGCCGTACCGGAAGGTGCGGCTGGATCACCTCCTTT                                                                                                                                                                                                                                                                                                                                                                                                                                                                                                                                                                                                                                                                                                                                                                                                                                                                                                                                                                                                                                                                                                                                                                                                                                                                                                                                                                                                                                              |
| GS08 | KA0025 | TGGAGGGTTCGATTCTGGCTCAGGATGAACGCTGGCGGGCTGCTTAACACATGCAAGTCGAACGGGATCTGACCAGCT<br>TGCTGGTTGGTGAGAGTGGCGAACGGGTGAGTAATGCGTGACCAACCTACCCCATGCTCCAGAATAGCTCCTGGAAAC<br>GGGTGGTAATGCTGGATGCTCCAACCTGACGCATGTTTTGTTGGGAAAGTGTTTAGCGGCATGGGATGGGGTCGCGTC<br>CTATCAGCTTGTAGGCGGGGTAATGGCCACCTAGGCTTCGACGGGTAGCCGGCCTGAGAGGGCGGACGGCCACATT<br>GGGACTGAGATACGGCCCAGACTCCTACGGGAGGCAGCAGTGGGGAATATTGCGCAATGGGGGAAACCCTGACGCAG<br>CGACGCCGCGTGCGGGATGAAGGCCTTCGGGTTGTAAACCGCTTTTGATTGGGAGCAAGCTTTCGGGTGAGTGTACCT<br>TTCGAATAAGCGCCGGTAACACTACGTGCCAGCAGCCGCGTAATACGTAGGGCGCAAGCGTTATCCGGAATTATTGGG<br>CGTAAAGAGCTTGTAGGCGGTTTCGTCGCGTCTGGTGTGAAAGCCCATCGCTTAACGGTGGGTCTGCGCCGGGTACGGG<br>CGGGCTAGAGTGCAGTAGGGGAAACTGGAATTCTCGGTGTAAACGGTGGAAATGTGTAGATATCGGGAAGAACAACCAAT<br>GGCGAAGGCAGGTTTCTGGGCTGTTACTGACGCTGAGAAGCGAAAGCGTGGGGAGCGAACAGGATTAGATACCCTGG<br>TAGTCCACGCCGTAAACGGTGGACGCTGGATGTGGGGCCCATTCCACGGGTTCCGTGTCGGAGCTAACGCGTTAAGCG<br>TCCCGCCTGGGGAGTACGGCCGCAAGGCTAAACTCAAAGAAATTGACGGGGGCCCGCACAAAGCGCGGAGCATGCG<br>GATTAATTCGATGCAACGCGAAGAACCTTACCTGGGCTTGACATGTGCCTGACGACTGCAGAGATGTGGTTTCCTTTC<br>GGGGCAGGTTACAGGTGGTGCATGGTCGTCGTCAGCTCGTGTGTCGTGAGATGTTGGGTTAAGTCCCGCAACGAGCGCA<br>ACCCTCGCCCTGTGTTGCCAGCGGGTATGCCGGGAACTCACGGGGGACCGCCGGGGTTAACTCGGAGGAAGGTGGG<br>GATGACGTCAGATCATCATGCCCTTACGTCCAGGGCTTACGCATGCTACAATGGCCAGTACAACGGGTTGCGACAT<br>GGTGACATGGAGCTAATCCCTTAAACTGGTCTCAGTTCGGATCGTAGTCTGCAACTCGACTACGTGAAGGCGGAGTC<br>GCTAGTAATCGCGAATCAGCAACGTCGCGGTGAATGCGTTCCCGGGCCTTGTACACACCGCCCGTCAAGTCATGAAAAG<br>TGGGCAGCACCCGAAGCCGGTGGCCTAACCTTTTTGGGATGGAGCCGTCTAAGGTGAGGCTCGTGATTGGGACTAAGT<br>CGTAAACAAGGTAGCCGTACCGGAAGGTGCGGCTGGATCACCTCCTTT |
| GS   |        | NR010TGGAGGGTTCGATTCTGGCTCAGGATGAACGCTGGCGGGCTGCTTAACACATGCAAGTCGAACGGGATCTGAC<br>CAGCTTGCTGGTTGGTGAGAGTGGCGAACGGGTGAGTAATGCGTGACCAACCTGCCCATGCTCCAGAATAGCTCTTG<br>GAAACGGGTGGTAATGCTGGATGCTCCAACCTGACGCATGTCTTGTGGGAAAGTGTTTAGTGGCATGGGATGGGGTC<br>GCGTCCTATCAGCTTGTAGGCGGGGTAATGGCCACCTAGGCTTCGACGGGTAGCCGGCCTGAGAGGGCGGACGGCC<br>ACATTGGGACTGAGATACGGCCCAGACTCCTACGGGAGGCAGCAGTGGGGAATATTGCGCAATGGGGGAAACCCTGA<br>CGCAGCGACGCCGCGTGCGGGATGAAGGCCTTCGGGTTGTAAACCGCTTTTGATTGGGAGCAAGCTTTCGGGTGAGTG<br>TACCTTTCGAATAAGCGCCGGTAACACTACGTGCCAGCAGCCGCGTAATACGTAGGGCGCAAGCGTTATCCGGAATTA<br>TTGGGCGTAAAGAGCTTGTAGGCGGTTTCGTCGCGTCTGGTGTGAAAGCCCATCGCTTAACGGTGGGTCTGCGCCGGGT<br>ACGGGCGGGCTAGAGTGCAGTAGGGGAGACTGGAATTCGGGTGTAAACGGTGGAAATGTGTAGATATCGGGAAGAACA<br>CCAATGGCGAAGGCAGGTCTCTGGGCTGTTACTGACGCTGAGAAGCGAAAGCGTGGGGAGCGAACAGGATTAGATAC<br>CCTGGTAGTCCACGCCGTAAACGGTGGACGCTGGATGTGGGGCCCATTCCACGGGTTCCGTGTCGGAGCTAACGCGTT                                                                                                                                                                                                                                                                                                                                                                                                                                                                                                                                                                                                                                                                                                                                    |

|  |  |                                                                                                                                                                                                                                                                                                                                                                                                                                                                                                                                                                                                                                                                                                                               |
|--|--|-------------------------------------------------------------------------------------------------------------------------------------------------------------------------------------------------------------------------------------------------------------------------------------------------------------------------------------------------------------------------------------------------------------------------------------------------------------------------------------------------------------------------------------------------------------------------------------------------------------------------------------------------------------------------------------------------------------------------------|
|  |  | AAGCGTCCCGCCTGGGGAGTACGGCCGCAAGGCTAAAACCTCAAAGAAATTGACGGGGGCCCCGCACAAGCGGCGGAG<br>CATGCGGATTAATTCGATGCAACGCGAAGAACCTTACCTGGGCTTGACATGTGCCTGTCGACTGCAGAGATGTGGTTT<br>CCCTTCGGGGCAGGTTACAGGTGGTGCATGGTCGTCGTCAGCTCGTGTGAGATGTTGGGTAAAGTCCCGCAACG<br>AGCGCAACCCTTGCCCTGTGTTGCCAGCGGGTTATGCCGGGAACTCACGGGGGACCGCCGGGGTAACTCGGAGGAA<br>GGTGGGGATGACGTCAGATCATCATGCCCTTACGTCCAGGGCTTCACGCATGCTACAATGGCCAGTACAACGGGTTG<br>CGACATGGTGACATGGAGCTAATCCCTTAAAACCTGGTCTCAGTTCGGATCGTAGTCTGCAACTCGACTACGTGAAGGC<br>GGAGTCGCTAGTAATCGCGAATCAGCAACGTCGCGGTGAATGCGTTCCCGGGCCTTGTACACACCGCCCGTCAAGTCA<br>TGAAAGTGGGCAGCACCCGAAGCCGGTGGCCTGACCTTTTTGGAGGGAGCCGTCTAAGGTGAGGCTCGTGATTGGGA<br>CTAAGTCGTAACAAGGTAGCCGTACCGGAAGGTGCGGCTGGATCACCTCCTT |
|--|--|-------------------------------------------------------------------------------------------------------------------------------------------------------------------------------------------------------------------------------------------------------------------------------------------------------------------------------------------------------------------------------------------------------------------------------------------------------------------------------------------------------------------------------------------------------------------------------------------------------------------------------------------------------------------------------------------------------------------------------|
